# Supplementary material
Source: Research Square preprint supplement (doi:10.21203/rs.3.rs-10385059/v1)
Supplement: Supplementary file 1 [file b08729a3c31cc52b9488db8b.docx]

**Supplementary Information A. PRISMA**

**Table S 1. Preferred Reporting Items for Systematic reviews and Meta-Analysis (PRISMA) 2020 Checklist**

| **Section and Topic** | **Item #** | **Checklist item** | **Location where item is reported** |
| --- | --- | --- | --- |
| **TITLE** | | |  |
| Title | 1 | Identify the report as a systematic review. | 1 |
| **ABSTRACT** | | |  |
| Abstract | 2 | See the PRISMA 2020 for Abstracts checklist. | Supplementary Information A |
| **INTRODUCTION** | | |  |
| Rationale | 3 | Describe the rationale for the review in the context of existing knowledge. | Pg.1 |
| Objectives | 4 | Provide an explicit statement of the objective(s) or question(s) the review addresses. | Pg. 2 |
| **METHODS** | | |  |
| Eligibility criteria | 5 | Specify the inclusion and exclusion criteria for the review and how studies were grouped for the syntheses. | Pg. 3 |
| Information sources | 6 | Specify all databases, registers, websites, organizations, reference lists and other sources searched or consulted to identify studies. Specify the date when each source was last searched or consulted. | Pg. 3 |
| Search strategy | 7 | Present the full search strategies for all databases, registers and websites, including any filters and limits used. | Pg. 3 |
| Selection process | 8 | Specify the methods used to decide whether a study met the inclusion criteria of the review, including how many reviewers screened each record and each report retrieved, whether they worked independently, and if applicable, details of automation tools used in the process. | Pg. 4 |
| Data collection process | 9 | Specify the methods used to collect data from reports, including how many reviewers collected data from each report, whether they worked independently, any processes for obtaining or confirming data from study investigators, and if applicable, details of automation tools used in the process. | Pg. 3 |
| Data items | 10a | List and define all outcomes for which data were sought. Specify whether all results that were compatible with each outcome domain in each study were sought (e.g. for all measures, time points, analyses), and if not, the methods used to decide which results to collect. | Pg. 3 |
| 10b | List and define all other variables for which data were sought (e.g. participant and intervention characteristics, funding sources). Describe any assumptions made about any missing or unclear information. | Pg. 3 |
| Study risk of bias assessment | 11 | Specify the methods used to assess risk of bias in the included studies, including details of the tool(s) used, how many reviewers assessed each study and whether they worked independently, and if applicable, details of automation tools used in the process. | Pg. 4 |
| Effect measures | 12 | Specify for each outcome the effect measure(s) (e.g. risk ratio, mean difference) used in the synthesis or presentation of results. | Pg. 4 |
| Synthesis methods | 13a | Describe the processes used to decide which studies were eligible for each synthesis (e.g. tabulating the study intervention characteristics and comparing against the planned groups for each synthesis (item #5)). | N/A |
| 13b | Describe any methods required to prepare the data for presentation or synthesis, such as handling of missing summary statistics, or data conversions. | Pg. 4 |
| 13c | Describe any methods used to tabulate or visually display results of individual studies and syntheses. | Pg. 4 |
| 13d | Describe any methods used to synthesize results and provide a rationale for the choice(s). If meta-analysis was performed, describe the model(s), method(s) to identify the presence and extent of statistical heterogeneity, and software package(s) used. | Pg. 4 |
| 13e | Describe any methods used to explore possible causes of heterogeneity among study results (e.g. subgroup analysis, meta-regression). | Pg. 4 |
| 13f | Describe any sensitivity analyses conducted to assess robustness of the synthesized results. | N/A |
| Reporting bias assessment | 14 | Describe any methods used to assess risk of bias due to missing results in a synthesis (arising from reporting biases). | Pg. 3 |
| Certainty assessment | 15 | Describe any methods used to assess certainty (or confidence) in the body of evidence for an outcome. | Pg. 3 |
| **RESULTS** | | |  |
| Study selection | 16a | Describe the results of the search and selection process, from the number of records identified in the search to the number of studies included in the review, ideally using a flow diagram. | Pg. 4 |
| 16b | Cite studies that might appear to meet the inclusion criteria, but which were excluded, and explain why they were excluded. | Pg. 5 |
| Study characteristics | 17 | Cite each included study and present its characteristics. | Pg. 5 |
| Risk of bias in studies | 18 | Present assessments of risk of bias for each included study. | Pg. 5 |
| Results of individual studies | 19 | For all outcomes, present, for each study: (a) summary statistics for each group (where appropriate) and (b) an effect estimate and its precision (e.g. confidence/credible interval), ideally using structured tables or plots. | Pg. 5 |
| Results of syntheses | 20a | For each synthesis, briefly summarise the characteristics and risk of bias among contributing studies. | Pg. 6 |
| 20b | Present results of all statistical syntheses conducted. If meta-analysis was done, present for each the summary estimate and its precision (e.g. confidence/credible interval) and measures of statistical heterogeneity. If comparing groups, describe the direction of the effect. | Pg. 6-8 |
| 20c | Present results of all investigations of possible causes of heterogeneity among study results. | Pg. 6-8 |
| 20d | Present results of all sensitivity analyses conducted to assess the robustness of the synthesized results. | Pg. 6-8 |
| Reporting biases | 21 | Present assessments of risk of bias due to missing results (arising from reporting biases) for each synthesis assessed. | Pg. 6-8 |
| Certainty of evidence | 22 | Present assessments of certainty (or confidence) in the body of evidence for each outcome assessed. |  |
| **DISCUSSION** | | |  |
| Discussion | 23a | Provide a general interpretation of the results in the context of other evidence. | Pg. 10 |
| 23b | Discuss any limitations of the evidence included in the review. | Pg. 11 |
| 23c | Discuss any limitations of the review processes used. | Pg. 11-12 |
| 23d | Discuss implications of the results for practice, policy, and future research. | Pg. 12 |
| **OTHER INFORMATION** | | |  |
| Registration and protocol | 24a | Provide registration information for the review, including register name and registration number, or state that the review was not registered. | N/A |
| 24b | Indicate where the review protocol can be accessed, or state that a protocol was not prepared. | N/A |
| 24c | Describe and explain any amendments to information provided at registration or in the protocol. | N/A |
| Support | 25 | Describe sources of financial or non-financial support for the review, and the role of the funders or sponsors in the review. | N/A |
| Competing interests | 26 | Declare any competing interests of review authors. | Pg. 13 |
| Availability of data, code and other materials | 27 | Report which of the following are publicly available and where they can be found: template data collection forms; data extracted from included studies; data used for all analyses; analytic code; any other materials used in the review. | Supplementary document |

*From:*  Page MJ, McKenzie JE, Bossuyt PM, Boutron I, Hoffmann TC, Mulrow CD, et al. The PRISMA 2020 statement: an updated guideline for reporting systematic reviews. BMJ 2021;372:n71. doi: 10.1136/bmj.n71

**Supplementary Information B. Search Strategy**

**Table S 2. Full Search Strings**

| Database | Search strategies | Results |
| --- | --- | --- |
| Scopus | (TITLE-ABS-KEY("Landscape" OR "Recreation" OR "Green*" OR "Park*" OR "Parkland" OR "Wilderness" OR "Forest*" OR "Garden" OR "Vegetation*" OR "Vegetated Area*" OR "Nature" OR "Natural" OR "Natural Element" OR "Natural Environment*" OR "Natural Outdoor Environment*" OR "Natural Surrounding*" OR "Natural Space*" OR "Natural Area*" OR "Natural Land" OR "NDVI" OR "Normalized Difference Vegetation Index" OR "Open Space*" OR "Open Land*" OR "Open Area*" OR "Tree*" OR "Grass*" OR "Shrub*" OR "Woodland*" OR "Wild*" OR "Wild Land" OR "Wild Area" OR "Urban Green" OR "Walkable Area" OR "Walkability" OR "Vegetated Area*" OR "Public Space*" OR "Public Area*" OR "Public Land*" OR "Morphology" OR "Typology" OR "Shape" OR "Spatial*" OR "Structure" OR "Distribution" OR "Pattern" OR "Character*" OR "Connect*" OR "Fragment*" OR "Size*") AND TITLE-ABS-KEY("physical activity" OR "Motor Activity*" OR "Sport*" OR "Physical Fitness" OR "Physical Exertion" OR "Physical Activity*" OR "Physical Inactivity" OR "Sedentary Behavior*" OR "Sedentary Behaviour*" OR "Sedentary Lifestyle*" OR "Inactive Lifestyle*" OR "Exercise*" OR "Active Living" OR "Active Lifestyle*" OR "Outdoor Activity*" OR "Walk*" OR "Bike" OR "Biking" OR "Bicycle" OR "Bicycling" OR "Cycling" OR "Stroll" OR "Strolling")) AND ( LIMIT-TO ( SUBJAREA,"SOCI" ) OR LIMIT-TO ( SUBJAREA,"AGRI" ) OR LIMIT-TO ( SUBJAREA,"ENVI" ) OR LIMIT-TO ( SUBJAREA,"HEAL" ) OR LIMIT-TO ( SUBJAREA,"PSYC" ) OR LIMIT-TO ( SUBJAREA,"ARTS" ) OR LIMIT-TO ( SUBJAREA,"MULT" ) OR LIMIT-TO ( SUBJAREA,"DECI" ) ) AND ( LIMIT-TO ( DOCTYPE,"ar" ) ) AND ( EXCLUDE ( EXACTKEYWORD,"Animals" ) OR EXCLUDE ( EXACTKEYWORD,"Animal" ) OR EXCLUDE ( EXACTKEYWORD,"Gait" ) OR EXCLUDE ( EXACTKEYWORD,"Demography" ) OR EXCLUDE ( EXACTKEYWORD,"Skeletal Muscle" ) OR EXCLUDE ( EXACTKEYWORD,"Rat" ) OR EXCLUDE ( EXACTKEYWORD,"Animal Model" ) OR EXCLUDE ( EXACTKEYWORD,"Unclassified Drug" ) OR EXCLUDE ( EXACTKEYWORD,"Animal Tissue" ) OR EXCLUDE ( EXACTKEYWORD,"Nutrient Cycling" ) OR EXCLUDE ( EXACTKEYWORD,"Mouse" ) OR EXCLUDE ( EXACTKEYWORD,"Rats" ) OR EXCLUDE ( EXACTKEYWORD,"Mice" ) ) AND ( LIMIT-TO ( LANGUAGE,"English" ) ) AND ( EXCLUDE ( EXACTSRCTITLE,"Soil Biology And Biochemistry" ) OR EXCLUDE ( EXACTSRCTITLE,"Plant And Soil" ) OR EXCLUDE ( EXACTSRCTITLE,"Biogeochemistry" ) OR EXCLUDE ( EXACTSRCTITLE,"Peerj" ) OR EXCLUDE ( EXACTSRCTITLE,"Applied Soil Ecology" ) OR EXCLUDE ( EXACTSRCTITLE,"ACS Sustainable Chemistry And Engineering" ) OR EXCLUDE ( EXACTSRCTITLE,"Revista Brasileira De Medicina Do Esporte" ) OR EXCLUDE ( EXACTSRCTITLE,"Geoderma" ) OR EXCLUDE ( EXACTSRCTITLE,"Water Research" ) OR EXCLUDE ( EXACTSRCTITLE,"Journal Of Chemical Education" ) OR EXCLUDE ( EXACTSRCTITLE,"Marine Chemistry" ) OR EXCLUDE ( EXACTSRCTITLE,"Chemsuschem" ) OR EXCLUDE ( EXACTSRCTITLE,"Animals" ) OR EXCLUDE ( EXACTSRCTITLE,"Retos" ) OR EXCLUDE ( EXACTSRCTITLE,"Oecologia" ) OR EXCLUDE ( EXACTSRCTITLE,"Leisure Studies" ) OR EXCLUDE ( EXACTSRCTITLE,"Chemosphere" ) OR EXCLUDE ( EXACTSRCTITLE,"Marine Ecology Progress Series" ) OR EXCLUDE ( EXACTSRCTITLE,"Medicina Dello Sport" ) OR EXCLUDE ( EXACTSRCTITLE,"Pm And R" ) OR EXCLUDE ( EXACTSRCTITLE,"Estuarine Coastal And Shelf Science" ) OR EXCLUDE ( EXACTSRCTITLE,"Soil Science Society Of America Journal" ) OR EXCLUDE ( EXACTSRCTITLE,"Undefined" ) ) | 23,315 |
| PubMed | 1 AND 2   1. "Landscape" OR "Recreation" OR "Green*" OR "Park*" OR "Parkland" OR "Wilderness" OR "Forest*" OR "Garden" OR "Vegetation*" OR "Vegetated Area*" OR "Nature" OR "Natural" OR "Natural Element" OR "Natural Environment*" OR "Natural Outdoor Environment*" OR "Natural Surrounding*" OR "Natural Space*" OR "Natural Area*" OR "Natural Land" OR "NDVI" OR "Normalized Difference Vegetation Index" OR "Open Space*" OR "Open Land*" OR "Open Area*" OR "Tree*" OR "Grass*" OR "Shrub*" OR "Woodland*" OR "Wild*" OR "Wild Land" OR "Wild Area" OR "Urban Green" OR "Walkable Area" OR "Walkability" OR "Vegetated Area*" OR "Public Space*" OR "Public Area*" OR "Public Land*" OR "Morphology" OR "Typology" OR "Shape" OR "Spatial*" OR "Structure" OR "Distribution" OR "Pattern" OR "Character*" OR "Connect*" OR "Fragment*" OR "Size*" 2. "physical activity" OR "Motor Activity*" OR "Sport*" OR "Physical Fitness" OR "Physical Exertion" OR "Physical Activity*" OR "Physical Inactivity" OR "Sedentary Behavior*" OR "Sedentary Behaviour*" OR "Sedentary Lifestyle*" OR "Inactive Lifestyle*" OR "Exercise*" OR "Active Living" OR "Active Lifestyle*" OR "Outdoor Activity*" OR "Walk*" OR "Bike" OR "Biking" OR "Bicycle" OR "Bicycling" OR "Cycling" OR "Stroll" OR "Strolling"   Filters: Full text, Humans, English | 4,956 |
| Medline via  EBSCOhost | S1 AND S2   1. S1   "Landscape" OR "Recreation" OR "Green*" OR "Park*" OR "Parkland" OR "Wilderness" OR "Forest*" OR "Garden" OR "Vegetation*" OR "Vegetated Area*" OR "Nature" OR "Natural" OR "Natural Element" OR "Natural Environment*" OR "Natural Outdoor Environment*" OR "Natural Surrounding*" OR "Natural Space*" OR "Natural Area*" OR "Natural Land" OR "NDVI" OR "Normalized Difference Vegetation Index" OR "Open Space*" OR "Open Land*" OR "Open Area*" OR "Tree*" OR "Grass*" OR "Shrub*" OR "Woodland*" OR "Wild*" OR "Wild Land" OR "Wild Area" OR "Urban Green" OR "Walkable Area" OR "Walkability" OR "Vegetated Area*" OR "Public Space*" OR "Public Area*" OR "Public Land*" OR "Morphology" OR "Typology" OR "Shape" OR "Spatial*" OR "Structure" OR "Distribution" OR "Pattern" OR "Character*" OR "Connect*" OR "Fragment*" OR "Size*"   1. S2   "physical activity" OR "Motor Activity*" OR "Sport*" OR "Physical Fitness" OR "Physical Exertion" OR "Physical Activity*" OR "Physical Inactivity" OR "Sedentary Behavior*" OR "Sedentary Behaviour*" OR "Sedentary Lifestyle*" OR "Inactive Lifestyle*" OR "Exercise*" OR "Active Living" OR "Active Lifestyle*" OR "Outdoor Activity*" OR "Walk*" OR "Bike" OR "Biking" OR "Bicycle" OR "Bicycling" OR "Cycling" OR "Stroll" OR "Strolling" | 1,838 |
| SPORTDiscus via  EBSCOhost | ( 1. "Landscape" OR "Recreation" OR "Green*" OR "Park*" OR "Parkland" OR "Wilderness" OR "Forest*" OR "Garden" OR "Vegetation*" OR "Vegetated Area*" OR "Nature" OR "Natural" OR "Natural Element" OR "Natural Environment*" OR "Natural Outdoor Environment*" OR "Natural Surrounding*" OR "Natural Space*" OR "Natural Area*" OR "Natural Land" OR "NDVI" OR "Normalized Difference Vegetation Index" OR "Open Space*" OR "Open Land*" OR "Open Area*" OR "Tree*" OR "Grass*" OR "Shrub*" OR "Woodland*" OR "Wild*" OR "Wild Land" OR "Wild Area" OR "Urban Green" OR "Walkable Area" OR "Walkability" OR "Vegetated Area*" OR "Public Space*" OR "Public Area*" OR "Public Land*" OR "Morphology" OR "Typology" OR "Shape" OR "Spatial*" OR "Structure" OR "Distribution" OR "Pattern" OR "Character*" OR "Connect*" OR "Fragment*" OR "Size*" ) AND ( 2. "physical activity" OR "Motor Activity*" OR "Sport*" OR "Physical Fitness" OR "Physical Exertion" OR "Physical Activity*" OR "Physical Inactivity" OR "Sedentary Behavior*" OR "Sedentary Behaviour*" OR "Sedentary Lifestyle*" OR "Inactive Lifestyle*" OR "Exercise*" OR "Active Living" OR "Active Lifestyle*" OR "Outdoor Activity*" OR "Walk*" OR "Bike" OR "Biking" OR "Bicycle" OR "Bicycling" OR "Cycling" OR "Stroll" OR "Strolling" ) | 8,137 |
| GreenLIFE via  EBSCOhost | ("Landscape" OR "Recreation" OR "Green*" OR "Park*" OR "Parkland" OR "Wilderness" OR "Forest*" OR "Garden" OR "Vegetation*" OR "Vegetated Area*" OR "Nature" OR "Natural" OR "Natural Element" OR "Natural Environment*" OR "Natural Outdoor Environment*" OR "Natural Surrounding*" OR "Natural Space*" OR "Natural Area*" OR "Natural Land" OR "NDVI" OR "Normalized Difference Vegetation Index" OR "Open Space*" OR "Open Land*" OR "Open Area*" OR "Tree*" OR "Grass*" OR "Shrub*" OR "Woodland*" OR "Wild*" OR "Wild Land" OR "Wild Area" OR "Urban Green" OR "Walkable Area" OR "Walkability" OR "Vegetated Area*" OR "Public Space*" OR "Public Area*" OR "Public Land*" OR "Morphology" OR "Typology" OR "Shape" OR "Spatial*" OR "Structure" OR "Distribution" OR "Pattern" OR "Character*" OR "Connect*" OR "Fragment*" OR "Size*") AND ("physical activity" OR "Motor Activity*" OR "Sport*" OR "Physical Fitness" OR "Physical Exertion" OR "Physical Activity*" OR "Physical Inactivity" OR "Sedentary Behavior*" OR "Sedentary Behaviour*" OR "Sedentary Lifestyle*" OR "Inactive Lifestyle*" OR "Exercise*" OR "Active Living" OR "Active Lifestyle*" OR "Outdoor Activity*" OR "Walk*" OR "Bike" OR "Biking" OR "Bicycle" OR "Bicycling" OR "Cycling" OR "Stroll" OR "Strolling") | 2,320 |
| Google Scholar  by:  Publish or Prish | |Landscape|Recreation|Green*|Park*|Parkland|Wilderness|Forest*|Garden|Vegetation*|Vegetated Area*|Nature|Natural|Natural Element|Natural Environment*|Natural Outdoor Environment*|Natural Surrounding*|Natural Space*|Natural Area*|Natural Land|NDVI|Normalized Difference Vegetation Index|Open Space*|Open Land*|Open Area*|Tree*|Grass*|Shrub*|Woodland*|Wild*|Wild Land|Wild Area|Urban Green|Walkable Area|Walkability|Vegetated Area*|Public Space*|Public Area*|Public Land*|Morphology|Typology|Shape|Spatial*|Structure|Distribution|Pattern|Character*|Connect*|Fragment*|Size*  AND  |physical activity|Motor Activity*|Sport*|Physical Fitness|Physical Exertion|Physical Activity*|Physical Inactivity|Sedentary Behavior*|Sedentary Behaviour*|Sedentary Lifestyle*|Inactive Lifestyle*|Exercise*|Active Living|Active Lifestyle*|Outdoor Activity*|Walk*|Bike|Biking|Bicycle|Bicycling|Cycling|Stroll|Strolling | 108 |

**Supplementary Information C. Risk of Bias Assessment**

Risk of bias for included studies was assessed using the ROBINS-E (Risk Of Bias In Non-randomized Studies of Exposures) tool. The assessment covered seven domains: confounding (covariate control), selection of participants, exposure measurement, outcome measurement, missing data, selective reporting, and analytical quality (spatial/statistical methods). Each domain, as well as overall study-level risk of bias, was rated as low, moderate, serious, or unclear.

Risk-of-bias assessments were conducted independently by two reviewers, with discrepancies resolved through discussion and consensus. To improve transparency and interpretability, results are presented both as detailed study-level assessments (Supplementary Information C1) and as aggregated summaries by exposure family (Supplementary Information C2).

**Supplementary Information C1. Study-level risk of bias assessment**

Study-level risk-of-bias assessments are presented using traffic-light plots, where each study is evaluated across all ROBINS-E domains. These visualizations allow comparison of methodological quality across studies within each exposure family.


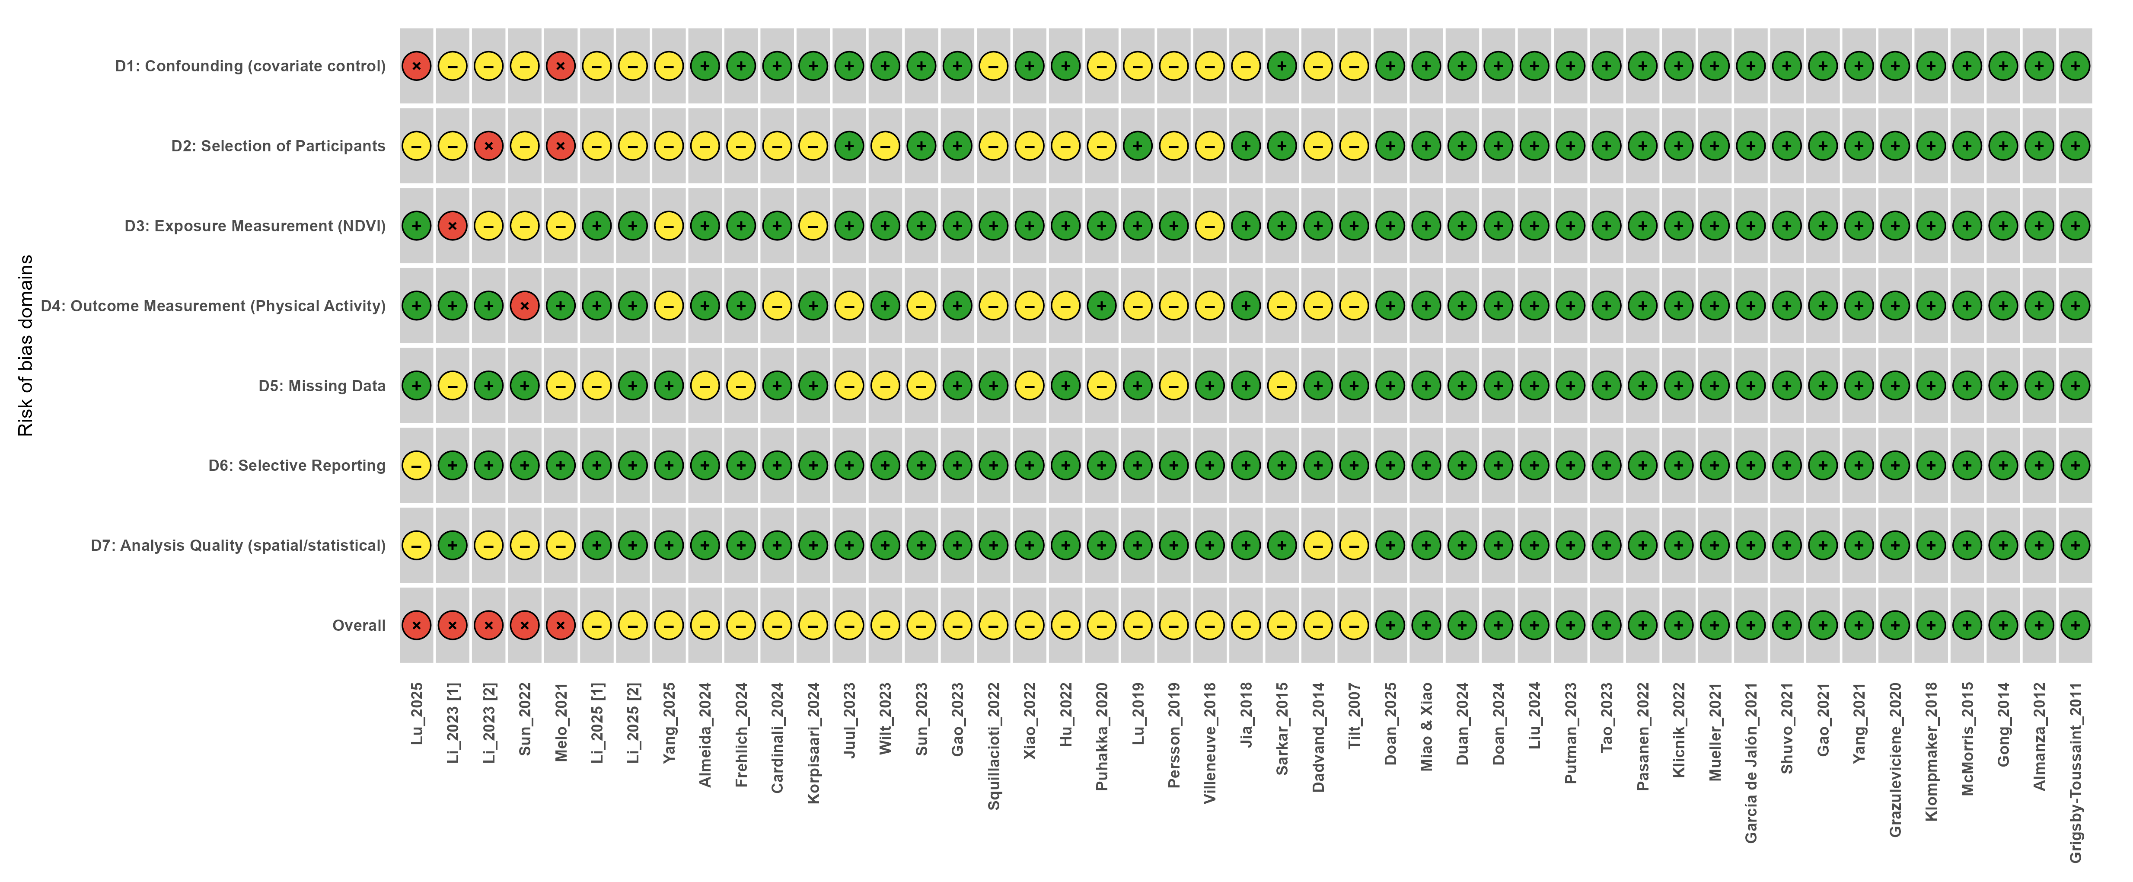


Figure C1. Risk of bias assessment for NDVI studies: Traffic-light plot showing domain-level and overall risk-of-bias assessments for studies examining satellite-derived greenness (NDVI) and physical activity. Each column represents an individual study, and each row corresponds to a ROBINS-E domain. Green indicates low risk, yellow indicates moderate risk, red indicates serious risk, and blue indicates unclear risk of bias.


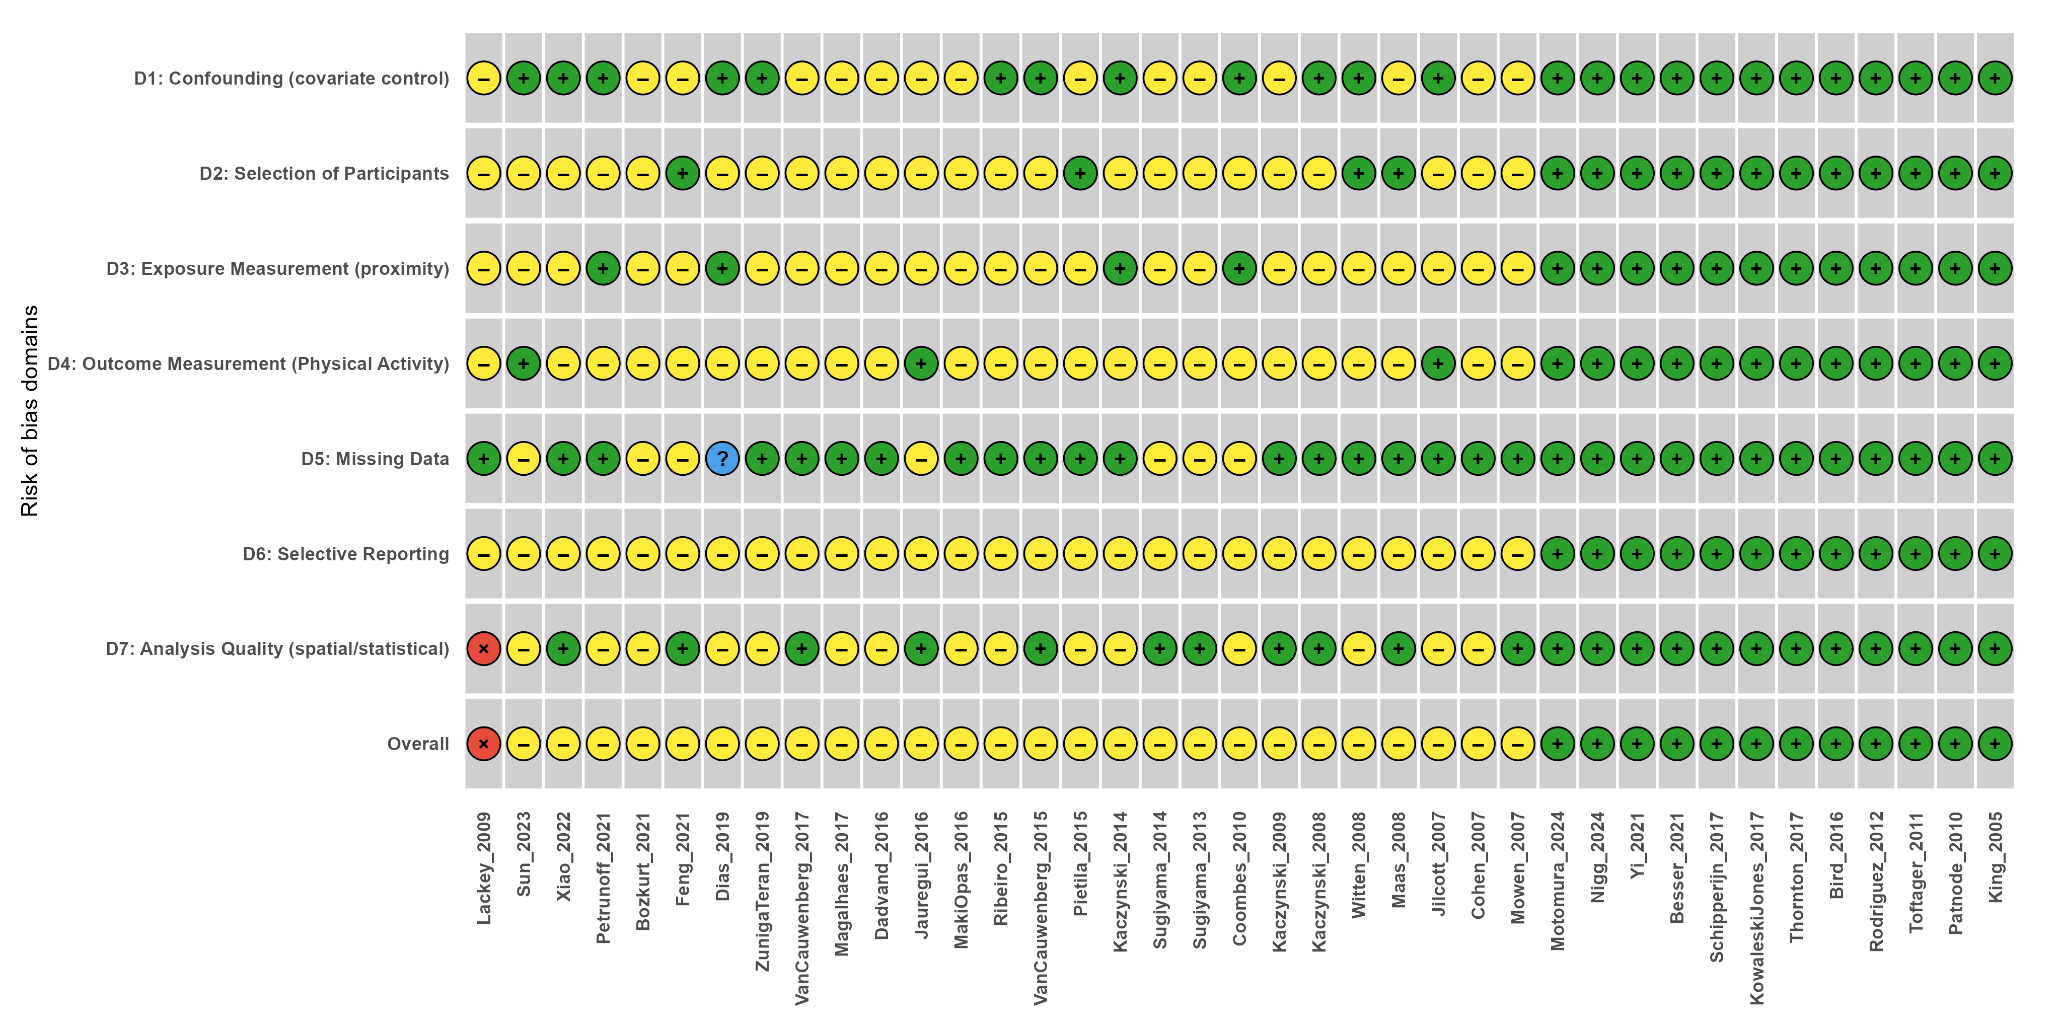


Figure C2. Risk of bias assessment for proximity studies: Traffic-light plot showing domain-level and overall risk-of-bias assessments for studies examining greenspace proximity and physical activity. Each column represents an individual study, and each row corresponds to a ROBINS-E domain. Colors indicate levels of risk of bias as defined by the ROBINS-E framework.


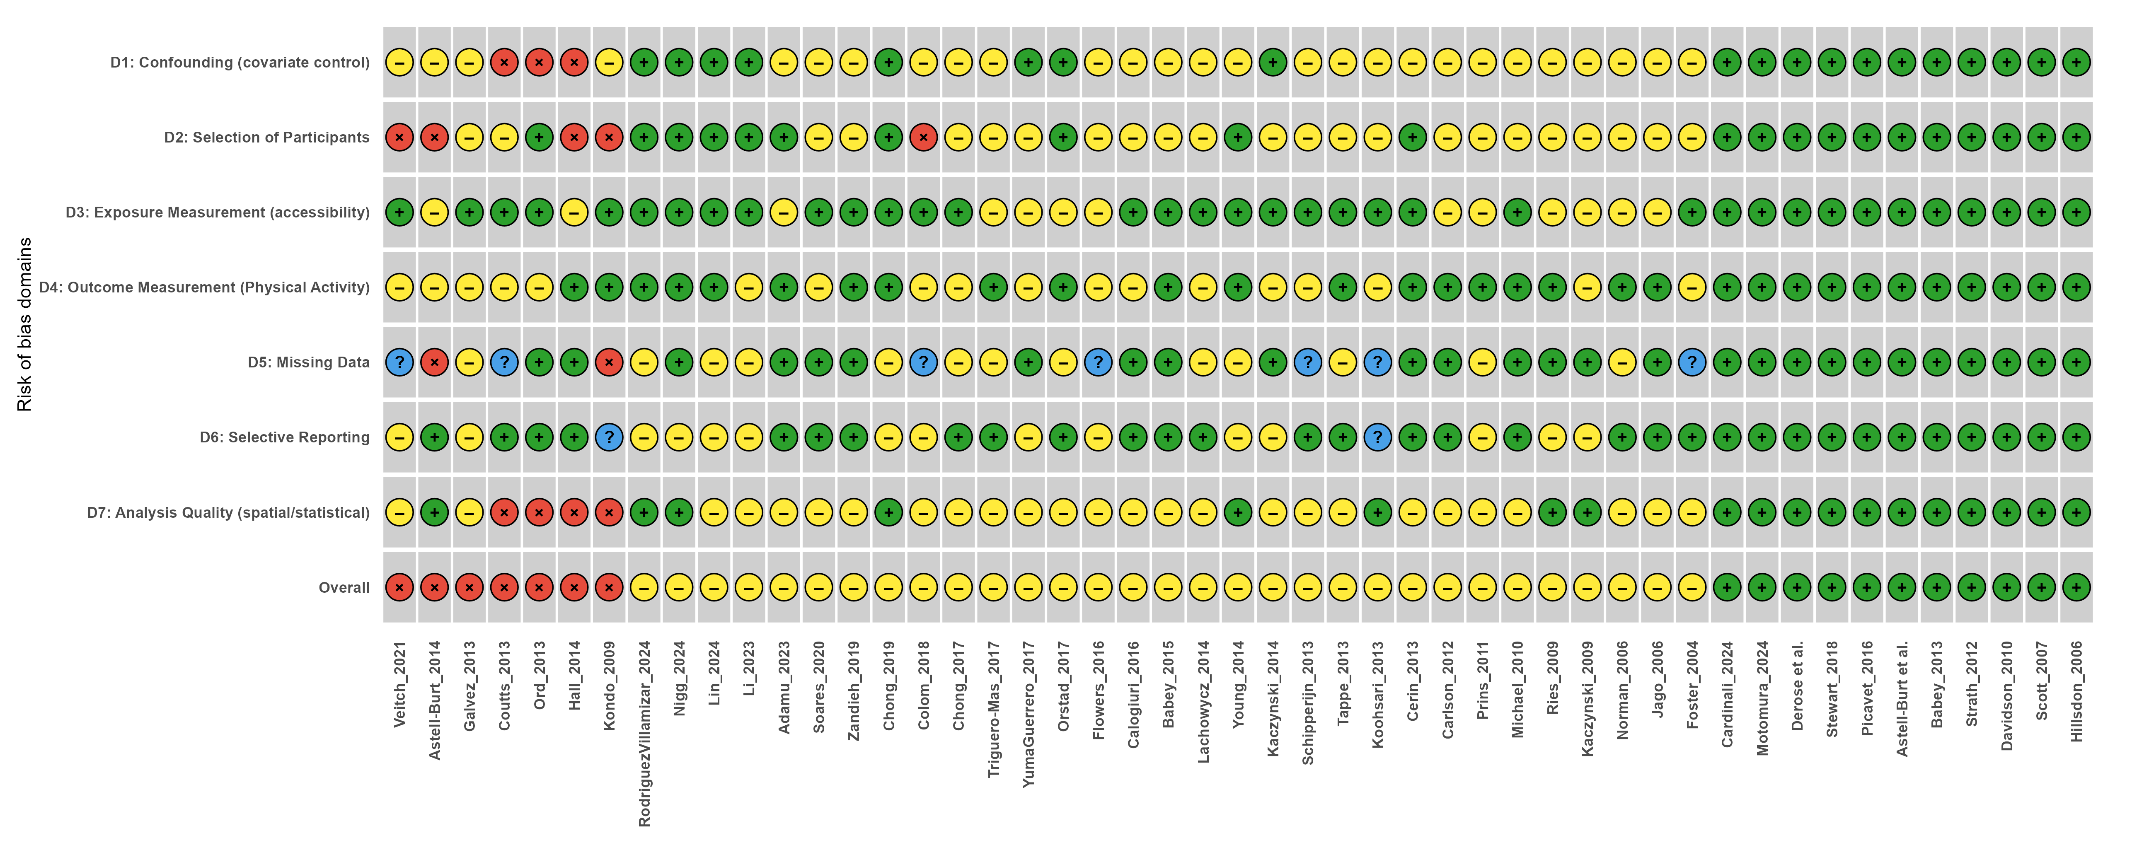


Figure C3. Risk of bias assessment for accessibility studies: Traffic-light plot showing domain-level and overall risk-of-bias assessments for studies examining greenspace accessibility and physical activity. Each column represents an individual study, and each row corresponds to a ROBINS-E domain. Colors indicate levels of risk of bias as defined by the ROBINS-E framework.


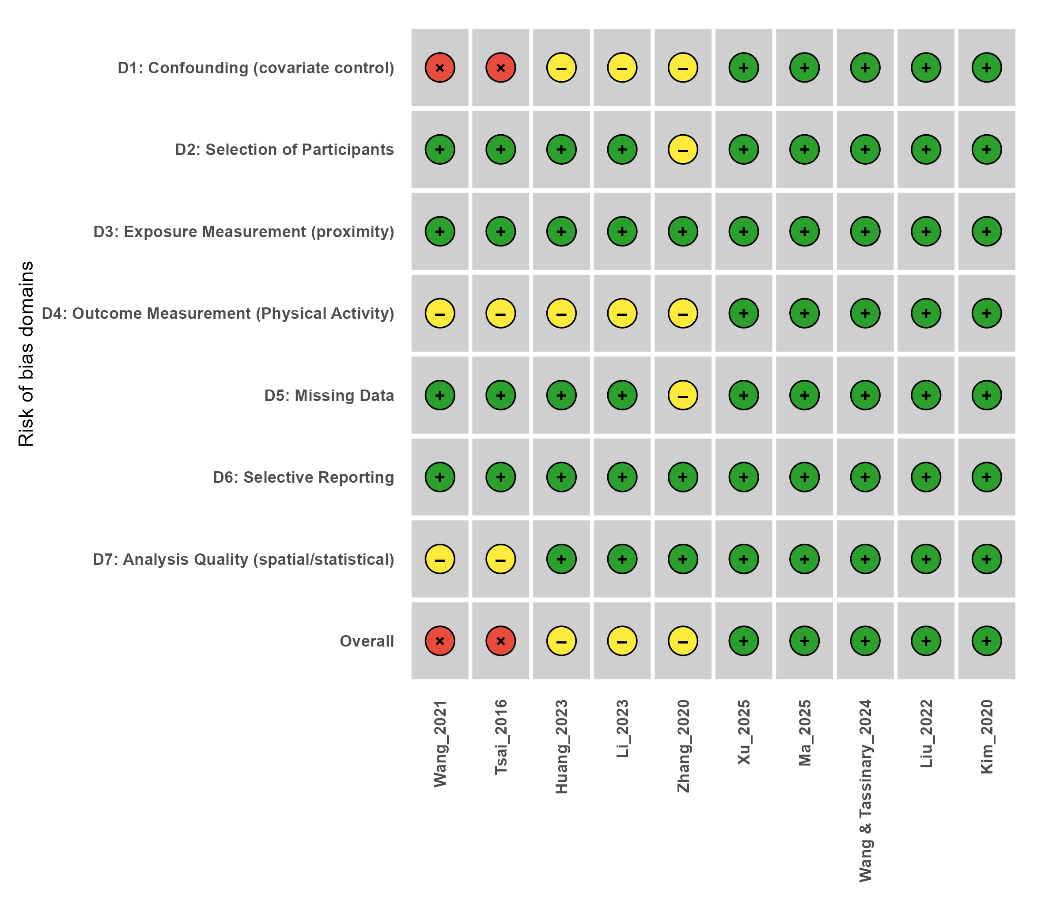


Figure C4. Risk of bias assessment for morphology studies: Traffic-light plot showing domain-level and overall risk-of-bias assessments for studies examining greenspace morphology and physical activity. Each column represents an individual study, and each row corresponds to a ROBINS-E domain. Colors indicate levels of risk of bias as defined by the ROBINS-E framework.

**Supplementary Information C2. Summary of risk of bias across studies**

To provide an overview of methodological quality across exposure families, aggregated distributions of risk-of-bias ratings are presented for each ROBINS-E domain. These summaries illustrate the proportion of studies rated as low, moderate, serious, or unclear risk of bias.


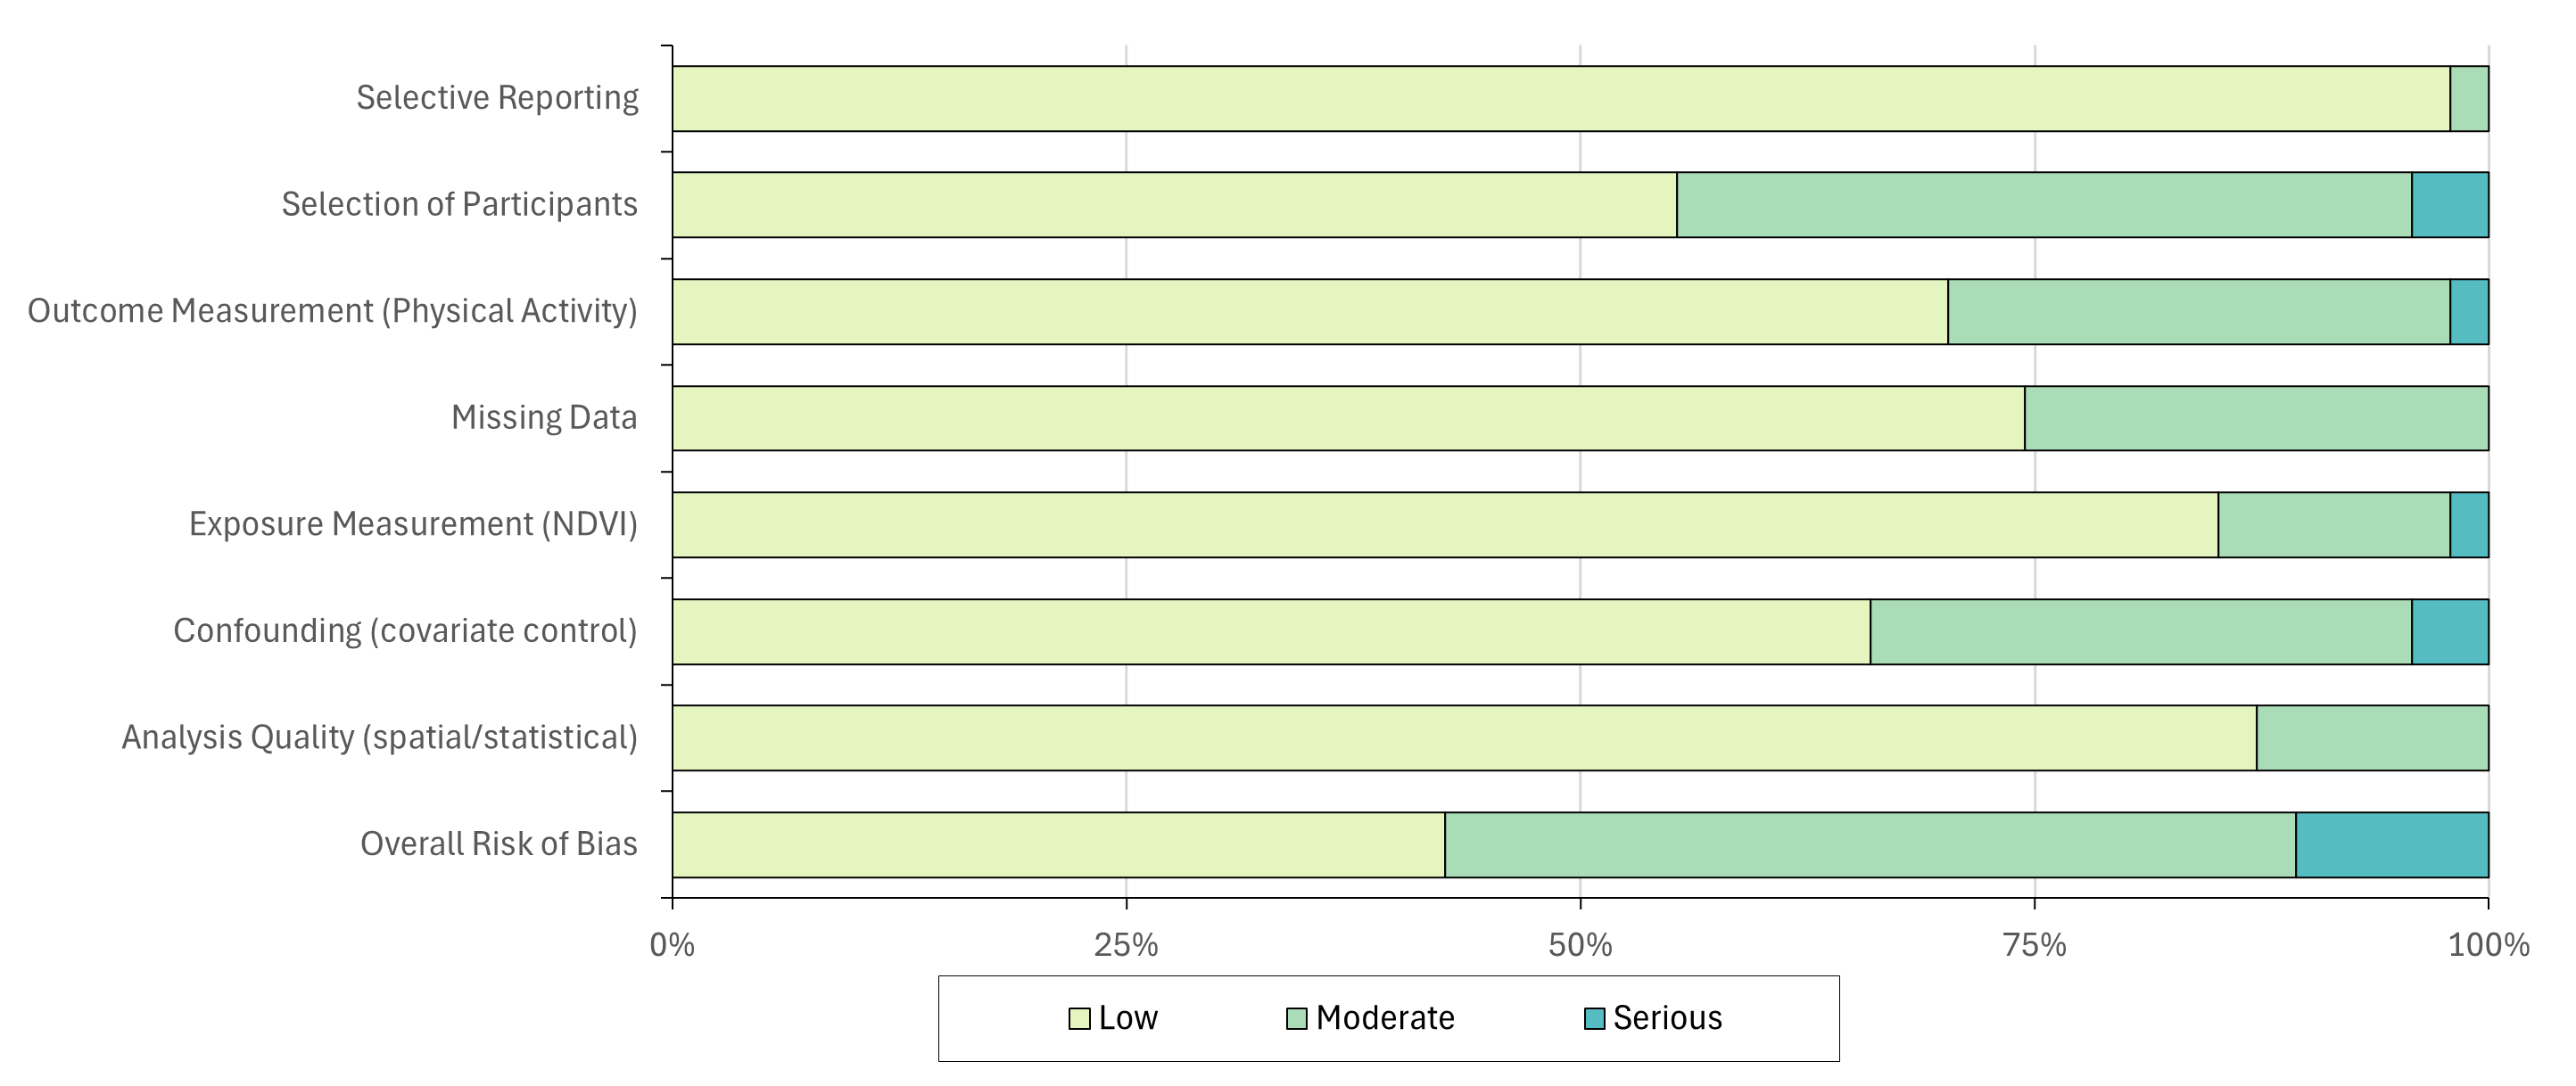


Figure C5. Summary risk of bias for NDVI studies: Stacked bar chart showing the proportion of studies rated as low, moderate, serious, and unclear risk of bias across ROBINS-E domains for studies examining NDVI and physical activity.


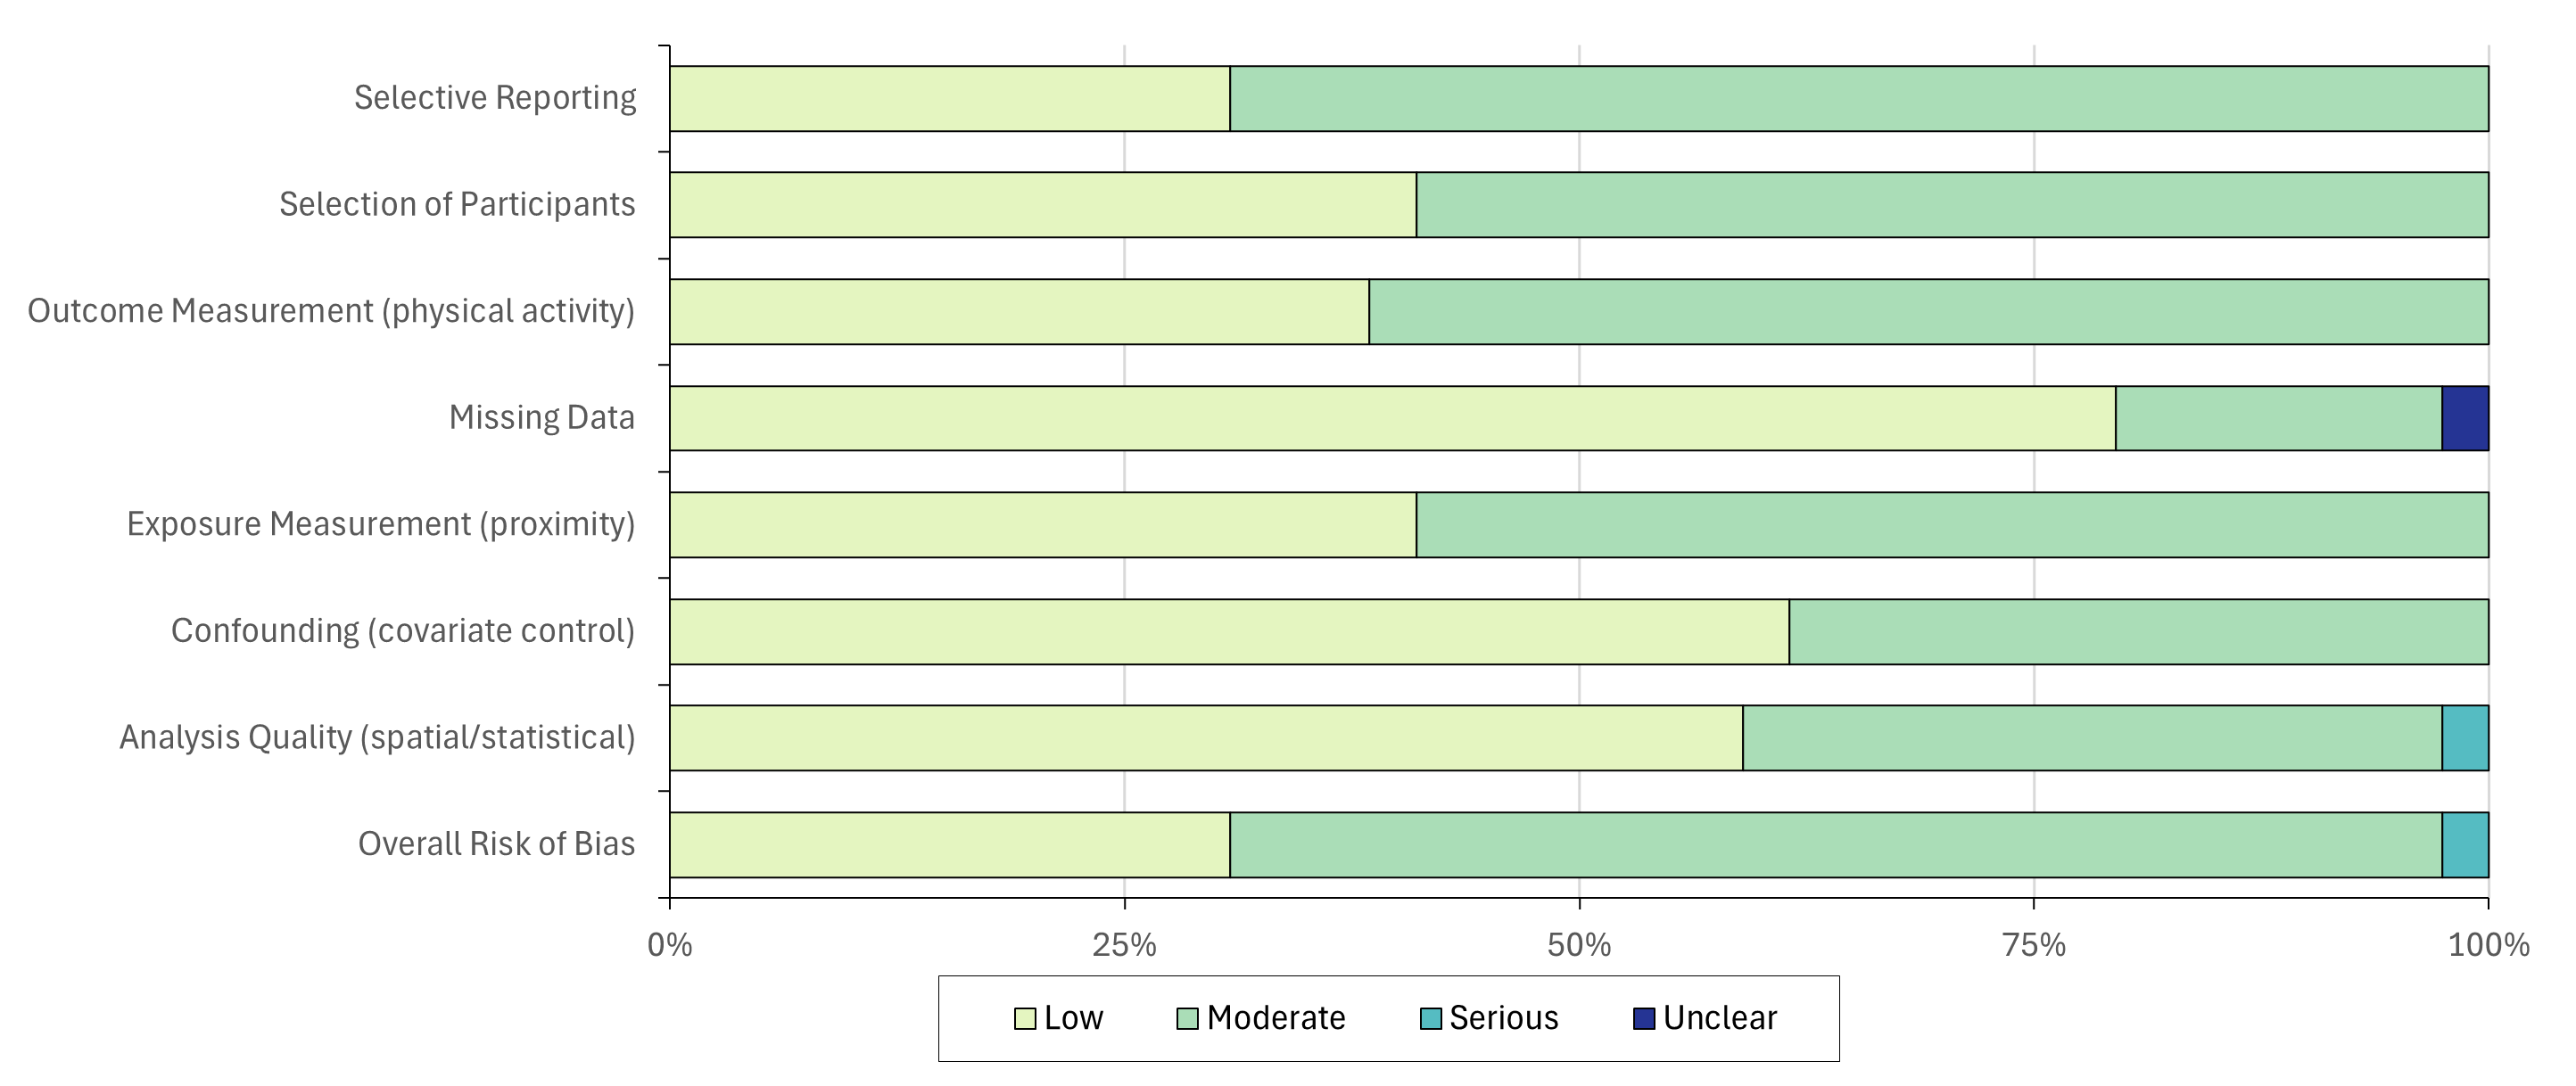


Figure C6. Summary risk of bias for proximity studies: Stacked bar chart showing the distribution of risk-of-bias ratings across ROBINS-E domains for studies examining greenspace proximity and physical activity.

**
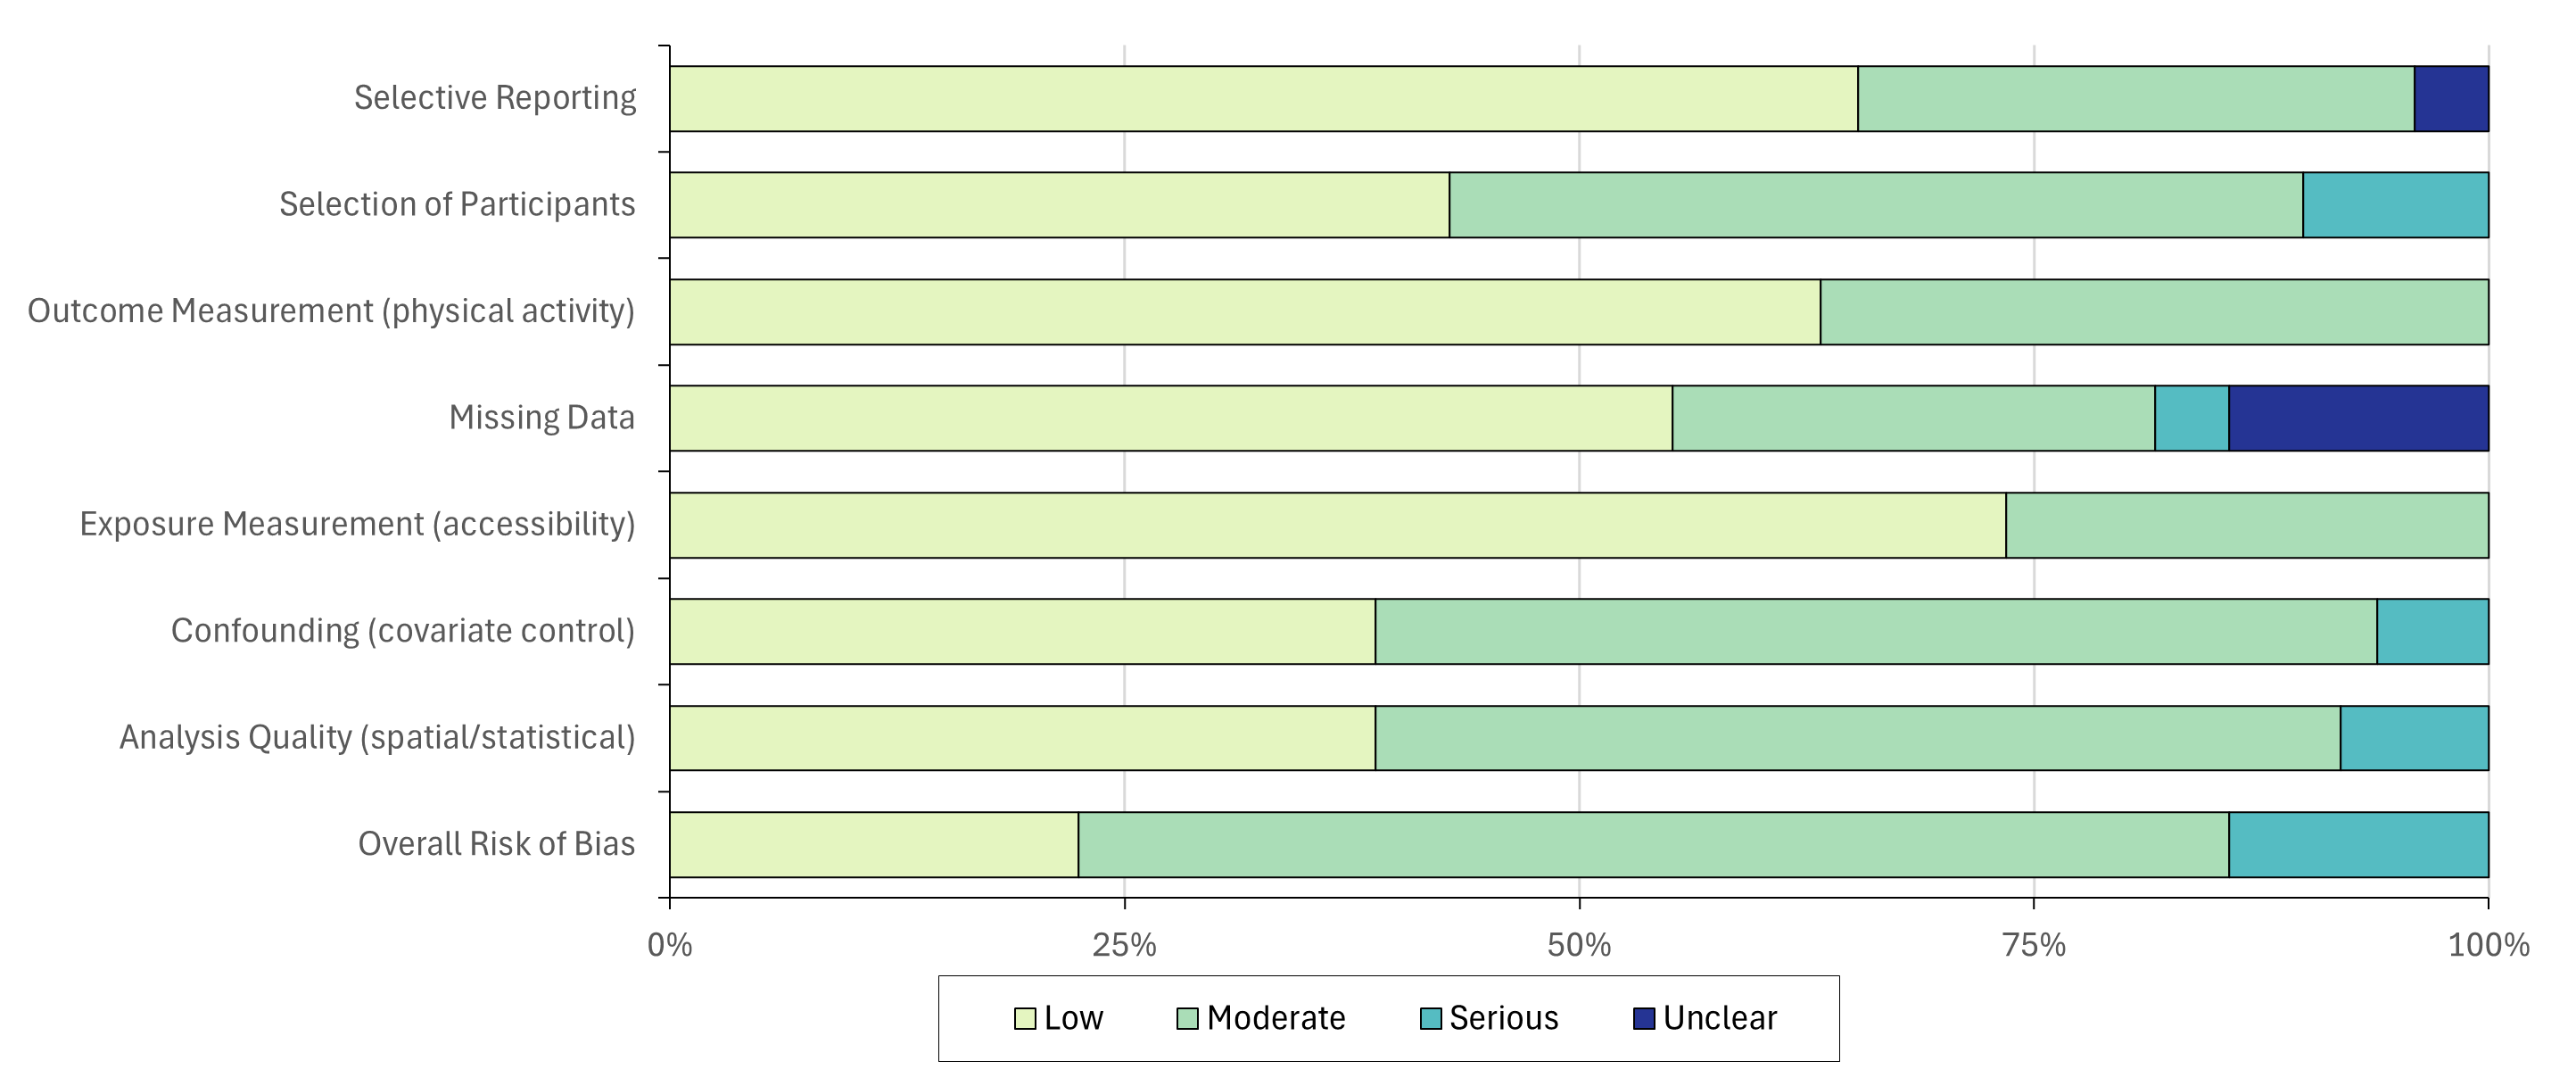
**

Figure C7. Summary risk of bias for accessibility studies: Stacked bar chart showing the distribution of risk-of-bias ratings across ROBINS-E domains for studies examining greenspace accessibility and physical activity.


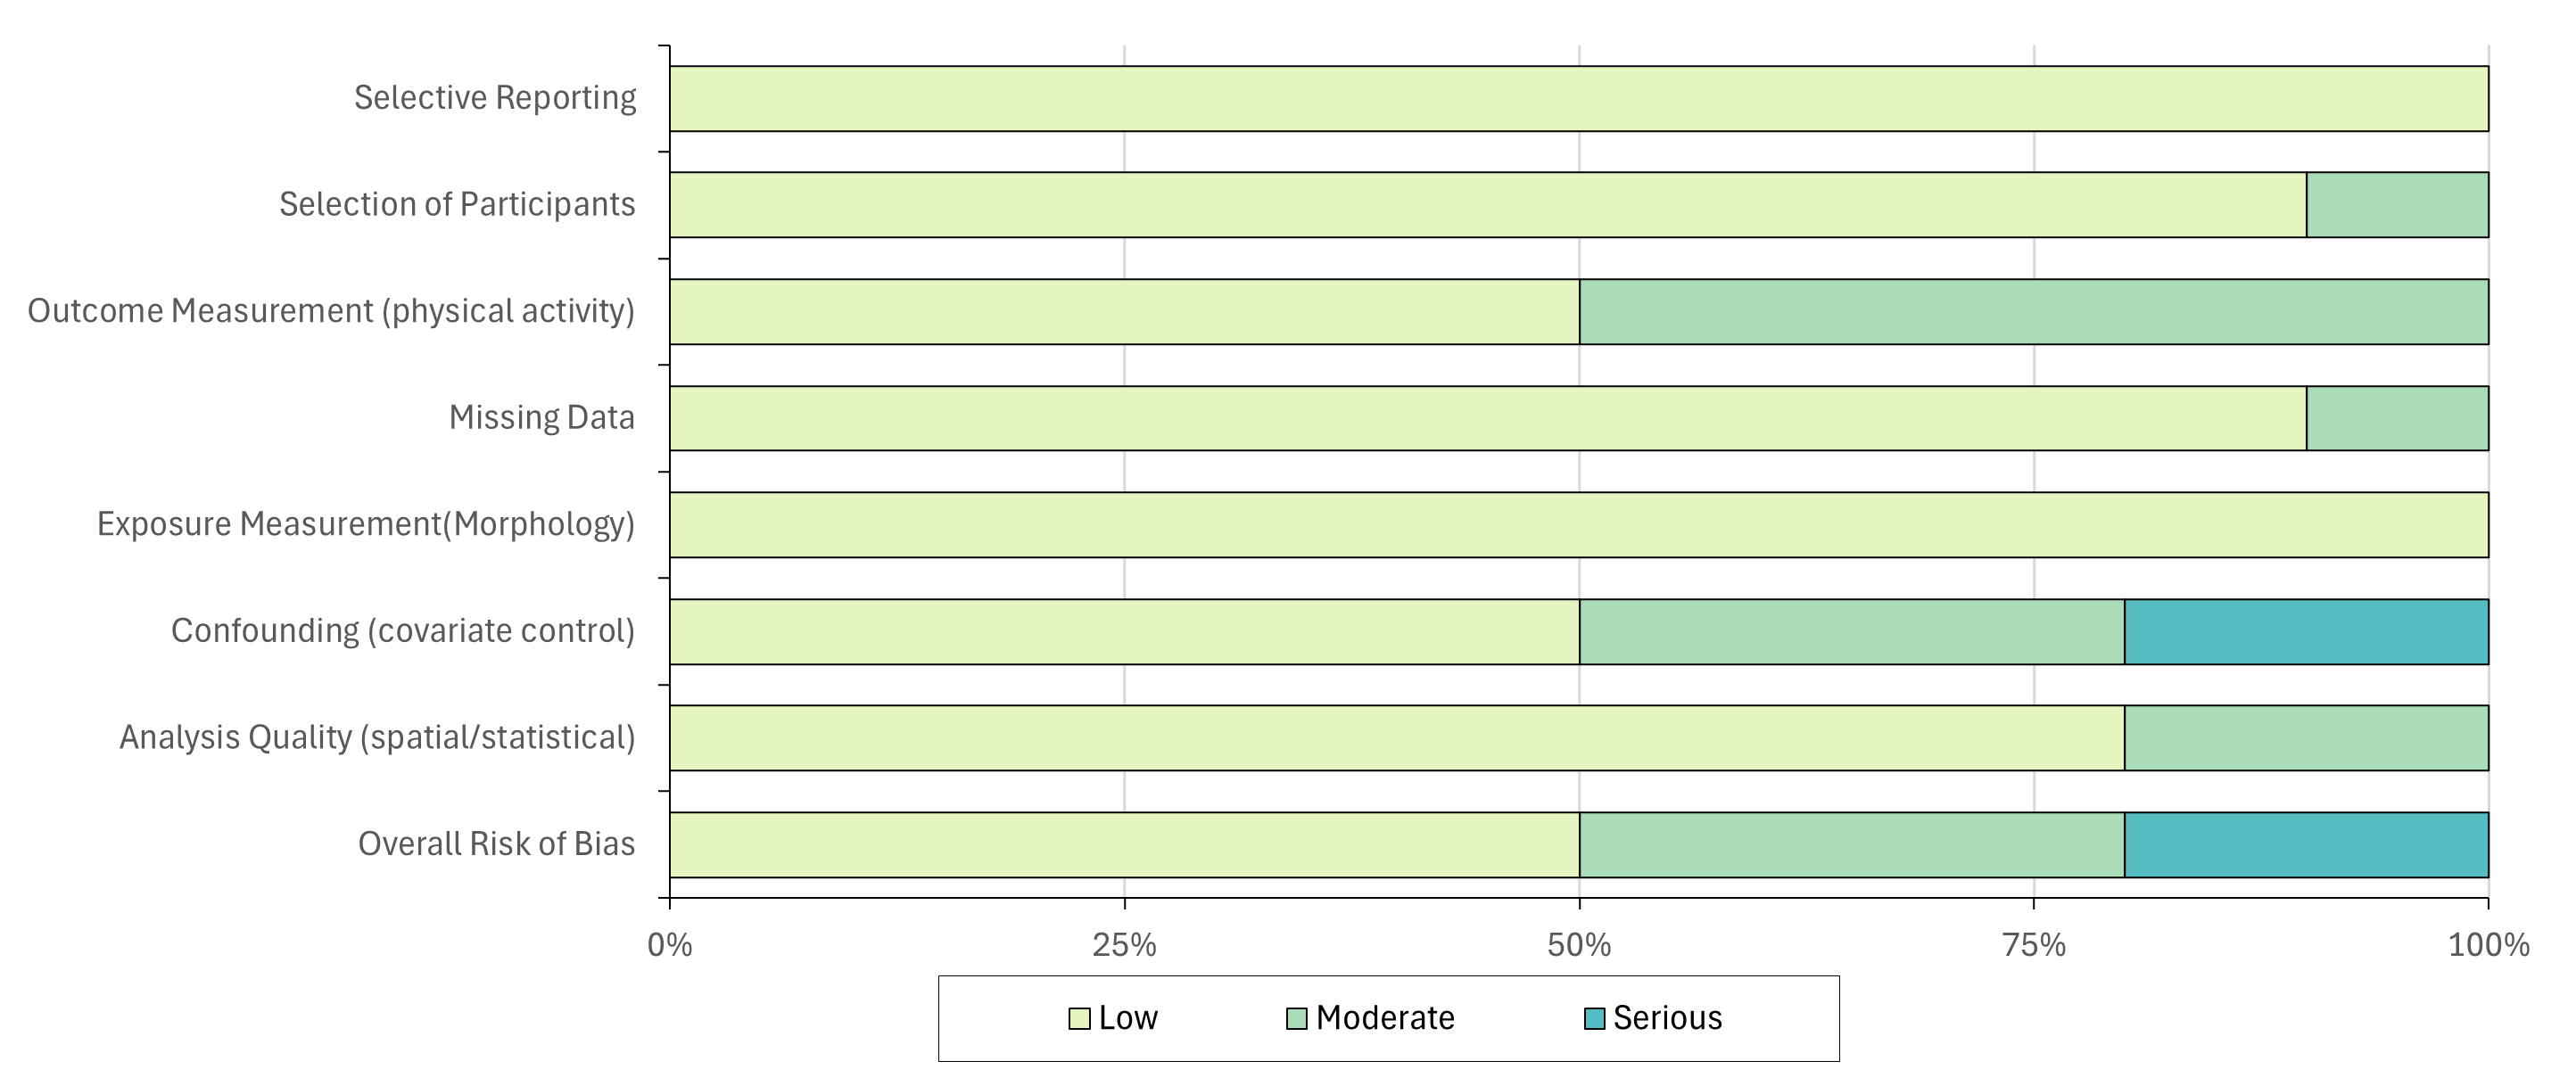


Figure C8. Summary risk of bias for morphology studies: Stacked bar chart showing the distribution of risk-of-bias ratings across ROBINS-E domains for studies examining greenspace morphology and physical activity.

**Supplementary Information D. Data Extraction Table**

Detailed characteristics of all included studies are presented in this appendix. To improve clarity and consistency with the analytical framework, studies are grouped by greenspace exposure family: satellite-derived greenness (NDVI), proximity, accessibility, and landscape morphology.

For each study, we report key information including study location, population, study design, exposure definition, spatial scale, physical activity outcome, and effect direction. This structured presentation supports transparency and enables comparison across heterogeneous measurement approaches.

**Table D1. NDVI studies (n = 47)**

| **Study Identification & General Info** | | **Study Design & Population** | | | **Greenness / NDVI Exposure Details** | | | **Physical Activity (PA) Outcome Details** | | **Statistical Analysis & Results** | | | | | | |
| --- | --- | --- | --- | --- | --- | --- | --- | --- | --- | --- | --- | --- | --- | --- | --- | --- |
| Study | Country / Region | Study Design | Sample Size | Population | NDVI Source  (MODIS, Landsat, Sentinel) | Spatial Resolution | Buffer Size | PA Outcome Type | Measurement Method  (self-reported questionnaire, accelerometer, pedometer, GPS) | Statistical Model | Covariates Adjusted For | Effect Estimate Type | Effect Estimate | 95% Confidence  Interval / Standard Error | p-value | Direction of Association  (positive, negative, null) |
| Almanza et al.  2012 | USA | Cross-sectional | 208 | Children  8-14 years | Landsat 5  Thematic Mapper | 30 m | 500 m | Moderate-to-vigorous  physical activity (MVPA) | Accelerometer  (Actigraph GT2M) + GPS (BT-335) | Generalized linear mixed model (logistic regression for momentary analysis);  Negative binomial GLM (individual-level analysis) | Gender,  age,  income,  race,  BMI,  leisure time,  community design,  NDVI × community design interaction,  MVPA kernel density | Odds ratio (momentary);  Multiplicative effect on daily min MVPA (individual-level) | OR=1.34 (conventional) & OR=1.39 (smart growth)  per 10th–90th percentile NDVI increase;  4.72× MVPA for >20 min/day greener space exposure | 1.30–1.38 (conventional),  1.36–1.44 (smart growth);  3.09–7.20 for >20 min/day greener exposure | <0.001 for NDVI association;  p=0.04 for NDVI × community interaction | Positive |
| Grigsby-Toussaint et al.  2011 | USA | Cross-sectional | 365 | Preschool children  2-5 years | Landsat  Thematic Mapper (USGS) | 30 m  (aggregated to 90 m) | Neighborhood pixel aggregation  (~8100 m² area around home) | Outdoor physical activity  (total outdoor playing time; active vs. quiet play) | Parent-reported questionnaire | Linear regression (total outdoor physical activity)  Multinomial logistic regression | Race  gender,  parental education,  BMI,  parental support | β coefficient (minutes/day) for linear regression;  Odds ratio for multinomial regression | β=2.82 min/day per NDVI unit;  OR=1.32 (95% CI=1.02–1.71) for multi-player behavior vs. rainy day kids | 0.21–5.43 (linear regression);  1.02–1.71 (multi-players) | 0.034 (linear regression),  0.037 (multi-players OR) | Positive |
| Gong et al.  2014 | UK | Cross-sectional | 1010 | Elderly men  66–86 years | Landsat | 30 m | 400 m and 800 m  from residence | Participation in outdoor physical activities  (walking, cycling, gardening)  and overall physical function | Self-reported questionnaire | Logistic regression | Age,  socioeconomic status,  smoking, alcohol  BMI,  comorbidities  season,  urban/rural classification | Odds ratio | OR=1.27 (95% CI=1.01–1.59)  for participation in physical activity for highest vs. lowest  quartile of greenness | 1.01–1.59 | 0.04 | Positive |
| McMorris et al.  2015 | Canada | Cross-sectional | 30,727 | General adult population  ≥20 years | Landsat 5 | 30 m | 500 m radius around postal code centroid | Total physical activity and leisure-time physical activity | Self-reported questionnaire  (Canadian Community Health Survey) | Linear regression models (for continuous PA outcomes)  and logistic regression models (for being sufficiently active) | Age,  sex,  education,  income,  marital status,  smoking,  alcohol,  BMI,  season,  urban–rural classification,  province | β coefficient  and odds ratio | β = 0.08 (p<0.05) for leisure-time physical activity per IQR increase in NDVI;  OR = 1.06 (p<0.05) for being sufficiently active | Not explicitly stated in text | <0.05 | Positive |
| Grazuleviciene et al.  2020 | Lithuania | Cross-sectional | 1,646 pregnant women | Pregnant women  18–45 years | Landsat 5 TM and Landsat 7 ETM+ | 30 m | 100 m, 300 m, and 500 m radii around residence | Regular physical activity during pregnancy (yes/no) | Self-reported questionnaire | Logistic regression | Age  education  marital status  employment  smoking  alcohol use  BMI  parity  depression history  socioeconomic status  season | Odds ratio | For NDVI within 300 m –  OR = 1.46 (95% CI: 1.10–1.94) for engaging in regular physical activity | 1.10–1.94 | <0.05 | Positive |
| Sarkar, C., et al.  2015 | UK | Cross-sectional | 19,806 adults | General adult population  16+ years | Landsat 7 ETM+ | 30 m | 800 m network buffer around residence | Walking for transport (minutes/week), walking for recreation (minutes/week) | Self-reported questionnaire (Active People Survey) | Multilevel linear regression | Age  sex  ethnicity  household income  employment status,  education,  health status,  urban design variables,  crime rate,  air pollution,  seasonality | β coefficient | Walking for transport: β = 0.10 (95% CI: 0.02–0.18, p < 0.05)  Walking for recreation: β = 0.03 (95% CI: –0.06–0.12, p > 0.05) | Walking for transport: 0.02–0.18  Walking for recreation: –0.06–0.12 | Walking for transport: <0.05  Walking for recreation: >0.05 | Walking for transport: Positive  Walking for recreation: Null |
| Li et al.,  2025 | China | Cross-sectional | Not specified for individuals (data from GPS tracking of park visitors) | General public visiting urban parks | Landsat 8 OLI | 30 m | 10 m around activity points along park routes | Amount,  intensity,  and diversity of physical activity along park routes | GPS tracking and accelerometer data | Generalized additive model (GAM) | Route slope,  proximity to entrances,  facilities,  and water,  land cover types,  vegetation density,  and weather conditions | Regression coefficient (β) | Positive association between NDVI and all three PA outcomes | Not reported in standard OR/CI format | <0.05 | Positive |
| Doan et al.,  2025 | Canada | Cross-sectional | 132,927 urban-dwelling youth and adults. | Youth (12–17)  Adults (≥18) living in urban areas. | Landsat 8 NDVI. | 30 m | Not a home-centred buffer — NDVI aggregated within 2016 dissemination areas (area-level exposure). | Transportational (PATRA) and recreational (PAREC) physical activity (minutes/day; log-transformed). | Self-reported CCHS modules for youth and adults. | Weighted multivariable linear regression (main effects and NDVI×walkability interaction). | Sex  age, race/ethnicity immigration education home ownership  self-rated health  season, community size  and neighbourhood marginalization | β coefficient. | **Effect Estimates (main effects of NDVI):**  Adults – PATRA: β = 0.2 (95% CI: 0.02, 0.36) — significant.  Adults – PAREC: β = 0.3 (95% CI: 0.14, 0.47) — significant.  Youth – PATRA: β = 0.5 (95% CI: −0.06, 0.99) — not significant.  Youth – PAREC: β = −0.1 (95% CI: −0.69, 0.49) — not significant.  **Interaction (NDVI × walkability):**  PATRA: significant for youth (β = 0.4, 95% CI: 0.21, 0.66) and adults (β = 0.3, 95% CI: 0.22, 0.35). | | Not directly reported; significance indicated by 95% CIs excluding 0. | Positive for adults (PATRA & PAREC); null for youth. |
| Almeida, et al.  2024 | Brazil | Longitudinal cohort  (8-year follow-up) | 4800 | Middle-aged and older adults  35–74 years | RapidEye 5 m imagery (2011) | 5 m | 500 m radius around participant’s residence | MVPA | Self-reported questionnaire (IPAQ long form) | Multilevel logistic regression | Age  sex  education  marital status  income  smoking  alcohol consumption,  BMI  chronic diseases  neighborhood income  follow-up time | Odds ratio | ORs: Q4 1.48 (1.04–2.12),  Q5 1.43 (1.00–2.04) |  |  | Null |
| Miao, et al.  2024 | China | Cross-sectional | 6416 older adults | Adults aged 60 years and older | Landsat 8 OLI | 30 m | 500 m radius around participant’s residence | Physical inactivity (defined as <150 minutes/week) | Self-reported questionnaire  (International Physical Activity Questionnaire – IPAQ) | Binary logistic regression | Age  sex  marital status  education  income  BMI  self-rated health  chronic disease  housing type  neighborhood-level socioeconomic status | β (linear regression) | 25.483 | Not reported | > 0.05 | Null |
| Duan, et al.  2024 | China | Cross-sectional | 13,629 older adults | Older Community-dwelling adults  ≥ 60 years | Landsat 8 OLI | 30 m | 500 m radius around residence | Leisure-time physical activity (LTPA) | Self-reported questionnaire | Multilevel logistic regression | Age  sex  education  marital status  BMI  smoking  drinking  household income  region,  PM2.5  season | Odds ratio (OR) | (500 m NDVI → LTPA):  OR = 1.16 | 1.12–1.20 | <0.001 | Positive |
| Doan et al.,  2024 | Canada | Cross-sectional  (pooled CHMS cycles 2007–2019) | 2,531 adults  with valid accelerometer data | Adults  18–79 years | CANUE Landsat NDVI (annual) | 30 m | 500 m radius around postal-code centroid (primary);  250 m and 1,000 m in sensitivity analyses | physical activity used as effect modifier (MVPA guideline adherence) | Actical accelerometer, 7 days;  MVPA adherence defined as ≥150 min/week (21.48 min/day) | Weighted logistic regression with bootstrap weights;  interaction tested on additive (RERI, AP, SI) and multiplicative scales | Age,  sex,  cultural/racial background,  BMI,  household education,  season,  Can-ALE walkability | Odds ratio (OR) | NDVI 500 m (higher vs. lower, median split) → poor/fair self-rated mental health: aOR = 0.89 (95% CI: 0.62–1.29), p > 0.05  NDVI 250 m & 1,000 m (sensitivity): results also null;  specific ORs not reported in the main text (appendices noted no change in conclusions). | | | Null |
| Frehlich et al.,  2024 | Canada | Cross-sectional secondary analysis with sex-stratified mediation analysis | Males n=2,983;  females n=3,085  (analytical sample varies by model: males 987–2,796; females 989–2,835) | Urban-dwelling Canadian adults  (mean age ≈ 47.6–47.7 years) | Terra MODIS MOD13Q1 Vegetation Indices  (16-day L3 Global) | 250 m | 1 km circular buffer around residential postal codes | Daily minutes of light (LPA),  moderate (MPA),  and vigorous (VPA) physical activity | Hip-worn Actical tri-axial accelerometer;  ≥4 valid days (≥10 hours/day) | Sex-stratified mediation (PROCESS macro) using unstandardized β coefficients with bootstrapped 95% confidence intervals;  covariate-adjusted | Age,  university education,  self-rated health,  self-rated mental health,  smoking status, marital status, ethnicity,  children <15 years in home  waist circumferenceweight,  PM2.5  walkability when modeling greenness, and vice versa | Unstandardized β coefficients (95% CI) | (β): 0.044 | 0.026 - 0.062 | < 0.001 | Negative |
| Cardinali et al.,  2024 | Portugal  France  Bulgaria  Denmark | Cross-sectional survey with 105 adjusted structural equation models (SEM) sensitivity analysis. | 1,365 participants. | Community samples from selected neighborhoods in four European cities.  14 to 99 years | Sentinel-2 imagery,  curated via the European Space Agency/EEA. | 10 m | 100–1,500 m (every 100 m) around residences;  NDVI computed for Euclidean buffers and buffered service area (BSA) network distance. | Self-reported physical activity  (self-rated PA). | Standardized questionnaire administered face-to-face (Porto)  or by phone (Nantes, Sofia, Høje-Taastrup). | SEM reporting standardized β (95% CI);  5,000 bootstrap samples; models adjusted for individual and area covariates. | Sex,  age,  disabilities  education  income  occupation,  years lived in neighbourhood  neighbourhood safety  satisfaction with shops  public transportaion  population | Standardized β coefficient (95% CI). | **Surrounding greenness (NDVI, Euclidean) 100 m:**  β = 0.542 (95% CI: 0.048, 1.023) — significant.  **Accessible greenness (NDVI, BSA) 100 m:**  β = 0.753 (95% CI: 0.221, 1.283) — significant.  **Surrounding greenness 900–1,500 m:**  pattern turns negative (peak at 1,300 m), not significant. | | | Positive at close proximity (100 m) for NDVI-based greenness;  attenuates/turns negative at larger distances (≥900 m) and is not significant there. |
| Korpisaari et al.,  2024 | Finland | Cross-sectional analysis at the 46-year NFBC1966 follow-up. | 5,433 | Community-based, middle-aged adults  (birth cohort participants).  46-year cohort;  mean ≈ 46.6 years. | Landsat 8 (USGS) satellite imagery. | 30 m | 1 km radius around each home address. | Daily minutes of LPA, MPA, VPA, MVPA, and total PA. | Wrist-worn accelerometer for 14 days (Polar Active);  inclusion required ≥4 valid days (≥600 min/day). | Generalized additive models (GAM) for PA–HRV relationships;  NDVI–PA contrasts presented as adjusted mean differences. | Education,  alcohol intake,  sleep duration,  BMI (from measured weight/height),  cardiorespiratory fitness (peak HR from step test),  and sedentary time (from accelerometer);  variables categorized to reduce multicollinearity. | Mean difference (MET-min/day) between residents in green (NDVI > 0.5) vs nongreen (NDVI < 0.5) areas, stratified by sex | **Men (green – nongreen):**  • LPA: +56.0 (95% CI 39.6, 72.4)  • MPA: +18.8 (95% CI 10.4, 27.3)  • MVPA: +27.1 (95% CI 5.2, 49.0)  • VPA: +8.2 (95% CI −6.7, 23.3)  • Total PA: +83.2 (95% CI 50.7, 115.6)  **Women (green – nongreen):**  • LPA: +38.7 (95% CI 23.8, 53.6)  • Total PA: +26.6 (95% CI 3.3, 49.8)  • MPA: −6.9 (95% CI −11.4, −2.4)  • MVPA: −12.1 (95% CI −25.8, 1.4)  • VPA: +5.1 (95% CI −16.5, 6.1) | | Not given explicitly for each contrast;  statistical significance inferred when 95% CI excludes 0 | Overall positive association of residential greenness with PA (particularly LPA and total PA);  patterns differed by sex (men: higher PA across intensities;  women: higher LPA/total PA but lower MPA/MVPA in green areas). |
| Li et al.,  2025 | China | Cross-sectional online survey with mediation analysis. | 801 | Adults  Captured in 7 categories  <18  18–25  26–30  31–40  41–50  51–60  >60 | MODIS (NASA) MOD13Q1 product;  maximum annual NDVI (2022) obtained via Google Earth Engine. | 250 m  (MOD13Q1). | 1,000 m radius around participant location;  mean NDVI within buffer. | Frequency of walking,  moderate PA,  and vigorous PA (last month). | 3-item brief PA assessment (Smith et al., 2005),  7-point Likert scale (“once a week or less” to “almost every day”),  ≥10-minute bouts;  self-reported. | Linear regression with robust SEs (HC3), unadjusted and adjusted models | Age,  gender,  education,  income | Regression coefficient (β) | (NDVI 1,000 m → PA; adjusted models)  **Walking:** β = 0.368; 95% CI = −0.490 to 1.766; p = 0.267.  **Moderate PA**: β = 1.325; 95% CI = 0.432 to 2.218; p = 0.004.  **Vigorous PA**: β = 1.201; 95% CI = 0.341 to 2.060; p = 0.006. | | | Positive for moderate and vigorous PA (significant);  null for walking. |
| Juul et al.,  2023 | Norway | Cross-sectional | 5,670 | Adults living in urban areas of Stavanger.  ≥18 years | Copernicus Global Land Service  Sentinel-3 satellite. | 250 m | NA | Weekly minutes of overall physical activity. | Self-reported questionnaire  (frequency and duration combined into weekly minutes) | Hierarchical linear regression | Age,  gender,  educational level,  perceived financial status;  perceived neighborhood safety added in Step 2;  interaction terms (e.g., NDVI×safety) in Step 3. | Unstandardized Regression coefficient (β) | • **Step 1** (adjusted for core covariates): NDVI → PA, β = 26.8 minutes/week (95% CI: 2.1, 51.4), significant.  • **Step 2** (+ perceived safety): β = 20.3 (95% CI: −4.3, 45.0), not significant.  • **Step 3** (+ interaction): β = 19.9 (95% CI: −4.9, 44.8), not significant. | | Step 1 p < 0.05 (asterisked in Table 2);  Steps 2–3 p ≥ 0.05 (no asterisk). | Positive in the minimally adjusted model |
| Putman et al.,  2023 | Canada | Cohort analysis | 16,735 | Community-dwelling older adults (CLSA).  ≥65 years | NDVI from the Canadian Urban Environmental Health Research Consortium (CANUE). | Not Reported | 500 m | Total weekly physical activity hours at baseline | Modified Physical Activity Scale for the Elderly (PASE);  frequency×duration summed to weekly hours. | Interaction term between NDVI and PA in regression models. | Age,  education,  household income;  sex-stratified analyses also reported. | Interaction coefficient (β) for NDVI × PA. | **NDVI moderation (total sample):**  • Physical impairment: β = 0.022, p = .04 (significant).  • Daily pain: β = 0.019, p < .01 (significant).  • Medications: No moderation (NS).  • Depressive symptoms: β = 0.032, p = .01 (significant). | | | Moderation:  Greenness strengthens (additively moderates) the protective PA–health associations for impairment,  pain, and depressive symptoms in the total sample (pattern varies by sex). |
| Wilt et al.,  2023 | USA | Cross-sectional | 337 | Adult women  ≥21 years | Landsat-8; seasonal,  cloud-free rasters processed in Google Earth Engine. | 30 m | No fixed residential buffer —  NDVI was joined to GPS points recorded ~every 10 min (mobility-based exposure). | Mean steps per minute  (10-min windows). | Fitbit™ wearables for PA;  smartphone app for GPS (10-min intervals). | Generalized Additive Mixed Models (GAMMs) | Age,  education,  marital status;  neighborhood SES (z-score, quartiles);  walkability (z-score, quartiles);  season,  Census region,  mean daily temperature,  precipitation | Non-linear GAMM smooth;  reported as change in steps/min per 0.1 NDVI within exposure ranges. | • NDVI 0–0.2: +0.8 steps/min per 0.1 NDVI (weak positive).  • NDVI 0.2–0.6: −1.0 steps/min per 0.1 NDVI (inverse).  • NDVI >0.6: +0.5 steps/min per 0.1 NDVI (weak positive). | Not reported |  | Non-linear; across the most common NDVI range (≈0.2–0.6) the association was inverse  (higher NDVI → fewer steps/min). |
| Tao et al.,  2023 | China | Cross-sectional | 30 sample plots across 3 parks | Park visitors observed in sample plots. | Not reported. | Not reported. | 400-m buffer around each park  (park-level NDVI). | (1) PA density (people per m²),  (2) PA diversity (ratio of observed PA types to total types). | On-site counts of individuals and their activity types at five time intervals per day on 3 days/month, Jan–Dec 2021. | Hierarchical Linear Model (HLM);  non-standardized coefficients with SE, t, p. | Model includes plot-level green indicators (SHDI, GCR, GVR, CLR)  and park-level indicators (400-m NDVI, 400-m GVR) | Regression coefficient (non-standardized β) with SE, t, and p. | **Park-level model (Model 1):** β = −42.228 (SE 8.860), p < 0.001.  • **Full model with all variables (Model 3):** β = −41.864 (SE 8.959), p < 0.001.  **Effect Estimate (NDVI → PA diversity):**  • **Park-level model (Model 4):** β = −1.583 (SE 1.089), p = 0.151 (NS).  **• Full model (Model 6):** β = −0.548 (SE 1.042), p = 0.601 (NS). | | p < 0.001 for density;  p = 0.151 and 0.601 for diversity | NDVI within 400 m is negatively associated with PA density (statistically significant)  and shows no significant direct association with PA diversity. |
| Sun et al.,  2023 | USA | Cross-sectional | 415020 | Pregnant women in urban areas  Mean age 30.2 ± 5.8 years | Terra  (MOD13Q1) satellite instrument of Moderate Resolu tion Imaging Spectroradiometer products from NASA, | 250 m | 200 m, 500 m and  1000 m buffers (about a 5-10-min walk) around the  residential address at delivery | Physical activity during pregnancy (mediator), summarized across pregnancy. | Self-reported at clinic visits recorded in EHRs (frequency per week and minutes per day over the prior 7 days;  converted to minutes/week and averaged across pregnancy). | Multiple linear regression for PA (percent change in log-transformed PA);  multilevel logistic regression for PPD; causal mediation analysis. | Maternal age,  race/ethnicity,  educational level,  and block-group household income;  zip code included as a random effect. | Percent change in PA per 0.1 increase in NDVI (for PA models/figure). | |  |  |  |
| Gao et al.,  2023 | China | Cross-sectional | 2,495,848 | Free-floating bike-sharing (FFBS) users/trips within Beijing’s Fifth Ring Road | Resource and Environment Science and Data Center (RESDC), May 2017 | 1 Km | Not Reported | Cycling-related activity proxied by FFBS trip counts (DV: Trips). | FFBS trip records (IoT) from Mobike aggregated to TAZ/time-of-day;  NDVI from RESDC (1 km);  GVI from Baidu Total View street-view images via CNN segmentation (SegNet). | Poisson regression with quasi-maximum likelihood | ln(Population density),  FAR,  Road density,  Land-use-mix entropy,  Distance to subway,  Distance to bus,  Distance to city center. | Incidence Rate Ratio (IRR). | • NDVI (baseline, all trips):  IRR = 0.0837, z = −165.9, *** |  | p < 0.001 for starred estimates | NDVI negative |
| Li et al.,  2023 | China | Cross-sectional | 668 | Urban residents in China recruited through online platforms  Mostly 15–35 years | MODIS (MOD13Q1 product, 2022)  obtained via Google Earth Engine | 250 m | 500 m radius around residence | Green physical activity  (for leisure, transportation walking, transportation cycling) | Self-reported questionnaires;  Likert scales for frequency and duration | Structural Equation Modeling (SEM) with Maximum Likelihood,  bias-corrected bootstrapping (10,000 reps) | Gender,  age,  household income,  education status,  marital status,  student status | Regression coefficient (β) | the mediation effect of physical activity (PA) between NDVI and mental well-being:  NDVI 500 m → Green leisure PA → Mental well-being:  B = −0.283 (95% CI −1.304, 0.634), p = 0.521 → not significant  NDVI 500 m → Green walking (transportation) → Mental well-being:  B = −0.056 (95% CI −0.454, 0.066), p = 0.279 → not significant  NDVI 500 m → Green cycling (transportation) → Mental well-being:  B = 0.213 (95% CI −0.055, 0.746), p = 0.117 → not significant | | | |
| Li et al.,  2023 | China | Cross-sectional | 3,785 | Users of the “DuoRui” sports/health app  (mainly young and middle-aged). | Landsat 8 (USGS) satellite imagery. | 30 m | Not applicable (grid-based analysis).  Grid scale 800×800 m;  moving window 100×100 m. | (1) Frequency of walking physical activity  (count of walking trajectories per grid);  (2) Intensity of walking physical activity  (total length of walking trajectories per grid, km). | App-derived GPS trajectories from DuoRui  (spatial position, type, duration, distance, date, frequency) | Multiple linear regression with Z-score-standardized predictors | Population density  housing density  housing price  land-use mix temperature  average daily precipitation  public toilet density  parking lot density  urban plaza density  bus stop density  number of path crossings  path density  % water body area;  distance to water body | Standardized regression coefficients (β) | • Frequency: β = –0.001, P = 0.955 (ns)    • Intensity: β = 0.007, P = 0.724 (ns) | Not reported. | 0.955 for frequency;  0.724 for intensity | No significant |
| Squillacioti et al.,  2022 | Italy | Cross-sectional | 323 | Healthy primary schoolchildren recruited through schools.  8–11 years | Sentinel-2  (cloud-free image acquired July 6, 2017)  from Theia platform. | 10 m | 100 m,  250 m,  300 m,  500 m,  and 1000 m  around home and school | Physical activity frequency (days/week with ≥60 minutes),  four categories (≤1, 2, 3, ≥4). | Parent questionnaire (SIDRIA) for PA and demographics | ordinal logistic regression | age;  sex,  BMI,  urinary cotinine,  mother’s and father’s education. | Regression coefficient (β) | NDVI (500 m, multisite) → PA:  OR ≈ 1.02 per IQR increase in NDVI, 95% CI: 0.73–1.43, p = 0.91 → not significant. | | | NDVI was not significant |
| Sun et al.,  2022 | China | Cross-sectional | 411 | Urban adult residents of central Dalian; lived in area ≥1 year  22–64 years | USGS Earth Explorer | 30 m | 400 m,  800 m,  1200 m,  1600 m  around home address. | Walking,  Moderate PA (MPA),  Vigorous PA (VPA);  total minutes/week. | Short, modified IPAQ (7-day recall);  PA time log-transformed for analysis. | | Age,  gender,  education,  income level,  car ownership. | Regression coefficient (β) | 400 m buffer:  • VPA: −0.049 (95% CI: −0.003, 0.001)  • MPA: 0.067 (95% CI: −0.001, 0.008)  • Walking: −0.076 (95% CI: −0.005, 0.001)  800 m buffer:  • VPA: −0.072 (95% CI: −0.001, 0.000)  • MPA: 0.034 (95% CI: −0.001, 0.002)  • Walking: −0.091 (95% CI: −0.002, 0.000)  1200 m buffer:  • VPA: −0.007 (95% CI: 0.000, 0.000)  • MPA: −0.007 (95% CI: −0.001, 0.001)  • Walking: −0.050 (95% CI: −0.001, 0.000)  1600 m buffer:  • VPA: −0.072 (95% CI: 0.000, 0.000)  • MPA: −0.034 (95% CI: −0.001, 0.000)  • Walking: −0.043 (95% CI: 0.000, 0.000) | | | Overall sample (without slope stratification):  NDVI (30 m, 400–1600 m buffers) was not significantly associated with total PA time, walking, MPA, or VPA at the 95% CI level.  Slope-stratified results:  Steep slopes (400 m buffer): NDVI was negatively associated with VPA.  Gentle slopes (800 m buffer): NDVI was negatively correlated with VPA. |
| Xiao et al.,  2022 | China | Cross-sectional | 4,555 individuals from 23 neighborhoods | Community-dwelling older adults  50–95 years | Landsat 7 satellite | 30 m | 500 m | Total physical activity (sum of recreational + active transport),  recreational activity,  and active transportation (all as energy expenditure). | WHO Global Physical Activity Questionnaire (GPAQ);  conversion to MET-minutes (4 METs for moderate, 8 METs for vigorous). | Multivariate linear regression | Self-rated health  gender  marital status,  education  job  income  age  road density  public transportation proximity  community area,  land-use mix | OLS coefficients with t-values | OLS (Table 2):  Total PA: 450.784 (t=2.83) **; Recreation: 249.148 (t=2.24) *; Active transportation: 202.747 (t=1.94) (ns). | OLS: t-values only; CIs/SEs not reported in Table 2.  • Two-part (logit): Total PA 0.974 (CI −11.07, 13.02), SE 6.146; Recreation 3.801 (CI −4.56, 12.16), SE 4.267; Active transportation −3.301 (CI −17.72, 11.12), SE 7.358.  • Two-part (gamma): Total PA −0.010 (CI −0.02, 0), SE 0.007; Recreation −0.001 (CI −0.02, 0.02), SE 0.008; Active transportation −0.020 (CI −0.04, 0), SE 0.010. | | • OLS: Positive for total and recreation; positive but non-significant for active transportation.  • Two-part: No significant association; gamma part estimates are small and negative (CIs cross 0). |
| Pasanen et al.,  2022 | Finland. | Longitudinal | n = 45 participants.  537 valid measurement days. | Recent retirees  mean age 64.8 years | Landsat 8 OLI satellite images | Not reported | 1250 m | Minutes/day of total PA,  light PA,  and MVPA;  also by context (home vs. non-home; active vs. passive travel). | Waist-worn SenseDoc 2.0 (accelerometer 80 Hz; GPS 1 Hz); | Linear regression | Age,  gender,  wear time,  measurement season  occupational status,  neighborhood socioeconomic disadvantage  BMI,  mobility limitations | | By residential greenness (Model 3 mean change over 1-year):  — Low greenness: +3.6 min/day MVPA (95% CL −4.4, 11.6)  — Moderate greenness: +14.4 (7.4, 21.3)  — High greenness: +28.1 (14.0, 42.3)  P for Time×Greenness interaction = 0.04. (Table 3) | | MVPA increase overall P<0.001;  active-travel MVPA P=0.03;  active-travel light PA P=0.01;  Time×Greenness interaction for MVPA P=0.04. | Positive  —participants in greener areas had higher PA at baseline and greater MVPA increases over 1 year, with the largest gain in the highest-greenness group. |
| Mueller et al.,  2021 | UK  Netherlands  Greece | Cross-sectional | 118 individuals. | Adults (≥18) living in households with a child <3 years | Sentinel-2 satellite imagery | 10 m | Residential buffers:  300 m and 1,000 m around home.  Trip-route buffers:  50 m along walking/cycling routes. | (1) Daily minutes of MVPA (Fitbit-derived).  (2) Trip-level MET-minutes (Moves app) for walking/cycling trips. | Fitbit Flex minutes with ≥100 steps as MVPA;  Moves app trips with GPS-derived duration/speed and grade;  METs assigned using Ainsworth compendium;  MET-minutes = MET×duration. | Linear mixed-effects models | Age,  sex,  season,  bluespace;  plus education,  employment,  walk score (walkability),  car ownership,  dog ownership;  for trips also weekday and local weather;  models additionally accounted for residential greenspace. | | **• Residential NDVI → daily MVPA (minutes/day):**  300 m: +1.14 (95% CI −0.41, 2.70)  1,000 m: +0.39 (95% CI −1.09, 1.86)  **• Trip-route NDVI → MET-minutes per trip (overall and by mode):**  Overall: +10.41 (95% CI 4.43, 16.39)  Walking: +7.81 (95% CI 4.12, 11.50)  Cycling: +15.53 (95% CI 8.60, 22.45) | | Not reported | Residential NDVI: null (CIs cross 0).  Trip-route NDVI: positive associations with trip MET-minutes (stronger for cycling than walking). |
| García de Jalón et al.,  2021 | Spain | Cross-sectional | 2,063.00 | Adults  18–65 years. | Sentinel-2, Landsat 8 | Not reported | Not applicable;  greenspace indicators were averaged across zip code areas within urban areas and linked to respondents | Days per week of walking,  moderate,  and vigorous activity (IPAQ-SF). | Web-based survey using the IPAQ-SF (short form) | Generalized linear mixed modelling | Age group  sex  environmental personal norms  household income;  thermal comfort preference  car use to go hiking;  importance of being healthy;  rural vs. urban residence;  children in household | Negative Binomial regression coefficient | β = 0.45 for NDVI (walking);  green surface and tree cover not significant for walking at p<0.01;  no significant NDVI effects for moderate/vigorous days. | Not reported | p < 0.01  (for NDVI → walking). | Positive for NDVI with days of walking;  non-significant for moderate and vigorous activity. |
| Melo et al.,  2021 | Portugal | Cross-sectional | 62 | Adolescents enrolled in public high schools.  12–18 years | Landsat 8 imagery | 30 m | 300,  500,  1000  and 1500 m from each participant’s  residence. | Moderate-to-vigorous physical activity (MVPA),  summarized as daily minutes. | ActiGraph GT3X+ accelerometers worn for 7 consecutive days | Adjusted linear regression models | European Deprivation Index for Portugal (EDI-PT) of the residential neighborhood;  analyses also stratified by gender. | Adjusted linear regression coefficient (β) | **300 m buffer**  B = 0.484  SE = 4.585  β = 0.014  95% CI: –8.687 to 9.655  t = 0.106, p = 0.916  **500 m buffer**  B = 2.274  SE = 2.295  β = 0.099  95% CI: –3.616 to 8.165  t = 0.772, p = 0.443  **1000 m buffer**  B = 1.516  SE = 1.102  β = 0.176  95% CI: –0.690 to 3.722  t = 1.375, p = 0.174  **1500 m buffer**  B = 0.955  SE = 0.725  β = 0.168  95% CI: –0.495 to 2.406  t = 1.318, p = 0.193 | | | |
| Shuvo et al.,  2021 | Australia | Cross-sectional | 589 | Areal units (suburbs);  no individual participants. | Sentinel-2 imagery | 10 m | Not applicable;  mean NDVI aggregated by suburb via zonal statistics (no buffers). | walkability | Walkability via Walk Score | OLS;  Spatial Lag Model (SLM);  Spatial Error Model (SEM);  Moran’s I | Percent urban green space (parkland),  neighborhood SES (IRSAD),  population density,  suburb size. | Regression coefficients β | OLS: NDVI β ≈ −81.15 (p<0.001);  SLM: NDVI β ≈ −44.60 (p<0.001);  SEM: NDVI β ≈ −71.76 (p<0.001). | | p < 0.001 | Negative association between NDVI and Walk Scorer |
| Gao et al.,  2021 | China | Cross-sectional | 40,272 street view images from 10,068 sampling points | urban commuters and residents | Landsat 8 images | 30 m | 1 km buffer around 101 metro stations | Cycling activity measured via dockless bike sharing trip records | Hourly usage counts aggregated from trip origins and destinations  (weekdays, weekends, holidays) | Backward Stepwise Linear Regression  Geographically Weighted Regression (GWR) | road intersection density  secondary road density  building density  floor area ratio  land use entropy retail/scenic spot density.  Tencent real-time population density | Regression coefficients  (local coefficients in GWR). | Do not report a regression coefficient (β)  with a standard error (SE) or 95% CI for NDVI. | Not reported. | p ≤ 0.01 (weekends, holidays),  NS (weekdays). | Negative (weekends, holidays),  null (weekdays). |
| Puhakka et al.,  2020 | Finland | Cross-sectional | 5433 | Midlife adults 46 years | Landsat 8 images | 30 m | 1 km radius circular buffer around residence  (residences ≥3 months) | Daily average MET-minutes for  LPA,  MPA,  VPA/VVPA,  and MVPA | Wrist-worn Polar Active accelerometer,  24 h/day for ~14 days; MET value every 30 s;  valid if ≥4 days with ≥600 min/day;  intensity bands:  LPA 2–3.49 MET,  MPA 3.5–4.99, V  PA 5–7.99,  VVPA ≥8 | Multiple linear regression | Gender (in all-participant models),  BMI,  physically strenuous work,  children <18 in family,  education level,  daily alcohol intake,  perceived health (excellent/good),  number of sports facilities  (sex-stratified models omit gender) | Linear regression beta (β) | **All participants**  LPA: B = 70 (95% CI: 26, 114), p < 0.001 → Positive  MPA: B = 5 (−14, 24), ns → Null  VPA/VVPA: B = −16 (−56, 23), ns → Null/negative, not significant  MVPA: B = −11 (−61, 39), ns → Null  **Men**  LPA: B = 140 (75, 204), p < 0.001 → Positive  MPA: B = 23 (−12, 60), ns → Null  VPA/VVPA: B = 15 (−49, 80), ns → Null  MVPA: B = 39 (−46, 125), ns → Null  **Women**  LPA: B = 17 (−42, 76), ns → Null  MPA: B = −12 (−32, 7), ns → Null/negative  VPA/VVPA: B = −36 (−86, 13), ns → Null/negative  MVPA: B = −48 (−108, 10), ns → Null/negative | | | |
| Lu et al.,  2019 | Hong Kong | Cross-sectional | 5701 | Community-dwelling residents  ≥15 years | Not reported | Not reported | 400 m,  800 m  and 1600 m  around each dwelling. | Cycling participation  (any vs. none) in the prior 3 months. | Face-to-face interviews in the 2011 Hong Kong Travel Characteristics Survey  (cycling frequency recalled for the preceding 3 months; geocoded dwelling locations). | Multilevel logistic regression | population density,  street intersection density,  land-use mix,  bike lane density,  number of bus stops,  number of retail shops,  terrain slope,  distance to nearest MTR station;  age,  gender,  household income. | Odds Ratio (per 1.0 unit increase in NDVI) | NDVI (400 m): OR 1.04 (95% CI 0.88–1.24), p=0.585.  NDVI (800 m): OR 1.02 (95% CI 0.75–1.39), p=0.882.  NDVI (1,600 m): OR 1.14 (95% CI 0.85–1.54), p=0.379. | | | Null  (no statistically significant association between NDVI and cycling across buffers). |
| Persson et al.,  2019 | Sweden | Longitudinal cohort | 42,611 | Adults from the Stockholm Public Health Cohort  Adults;  baseline mean 55 (SD 15) | Landsat 5 TM and  Landsat 8 | 30 m | 1 km and 2 km circular buffers around SAMS centroids | (1) Walking/cycling (daily categories)  (2) Exercise (weekly categories), each coded as change from 2010→2014:  decreased / stable / increased | Self-reported PAQ questionnaire | Multinomial logistic regression | Gender,  age,  education,  area-based income;  subgroup analyses by gender,  age,  education,  and area-based income | Odds ratios (OR) | walking/cycling  Decreased, moved to greener: OR 1.42 (95% CI 1.28–1.58)  Decreased, moved to less green: OR 1.07 (0.96–1.19)  Increased, moved to less green: OR 1.26 (1.13–1.41)  Increased, moved to greener: OR 1.09 (0.97–1.22)  Exercise  Decreased, moved to less green: OR 1.22 (1.09–1.36)  Decreased, moved to greener: OR 1.25 (1.12–1.38)  Increased, moved to less green: OR 1.11 (0.99–1.24)  Increased, moved to greener: OR 0.89 (0.79–0.99) | | Not reported | Contrary to the hypothesis—moving to a greener area associated with decreased walking/cycling;  moving to a less green area associated with increased walking/cycling.  For exercise, moving to either greener or less green areas associated with decreased exercise. |
| Villeneuve et al.  2018 | Canada | Cross-sectional | 282 | Adult residents of Ottawa  18–77 years | MODIS Aqua satellite | 250 m | Not reported | Weekly hours of self-reported recreational physical activity | Online survey | Least squares regression | Age,  sex,  income,  marital status,  children under 5 in household,  years in neighbourhood,  perceived neighbourhood safety | Adjusted mean hours/week across quartiles | Summer overall leisure PA:  12.1, 11.5, 13.8, 12.1 h/wk; p = 0.28  Summer neighbourhood leisure PA:  6.5, 7.1, 8.5, 7.0 h/wk; p = 0.14  Winter overall leisure PA:  6.9, 5.8, 7.1, 4.8 h/wk; p = 0.47  Winter neighbourhood leisure PA:  3.1, 3.3, 4.1, 2.9 h/wk; p = 0.37 | | | Null for NDVI  (no significant associations with physical activity, PCS, or MCS scores). |
| Klompmaker et al.,  2018 | Netherlands | Cross-sectional | 354,827 | General adult population  ≥19 years | Landsat 5 TM | 10 m | 100,  300,  500,  1000,  3000 m  (circular buffers around residences). | Outdoor moderate-to-vigorous physical activity ≥150 min/week (binary);  also analyzed as minutes/week (continuous). | Self-reported PA from PHM | Logistic regression for binary PA outcome | Age,  sex,  marital status,  country of origin,  education,  work,  household income,  smoking,  alcohol,  indoor physical activity,  neighborhood SES,  degree of urbanization | Odds Ratio | **100 m buffer**  Q2: OR = 1.06 (1.03, 1.09)  Q3: OR = 1.08 (1.05, 1.11)  Q4: OR = 1.12 (1.09, 1.15)  Q5: OR = 1.18 (1.15, 1.21)  **300 m buffer**  Q2: OR = 1.08 (1.05, 1.11)  Q3: OR = 1.10 (1.07, 1.13)  Q4: OR = 1.13 (1.10, 1.16)  Q5: OR = 1.14 (1.10, 1.17)  **500 m buffer**  Q2: OR = 1.06 (1.03, 1.09)  Q3: OR = 1.09 (1.06, 1.12)  Q4: OR = 1.12 (1.09, 1.15)  Q5: OR = 1.13 (1.10, 1.16)  **1000 m buffer**  Q2: OR = 1.05 (1.02, 1.08)  Q3: OR = 1.08 (1.05, 1.11)  Q4: OR = 1.10 (1.07, 1.13)  Q5: OR = 1.10 (1.07, 1.13)  **3000 m buffer**  Q2: OR = 1.05 (1.02, 1.08)  Q3: OR = 1.06 (1.03, 1.09)  Q4: OR = 1.08 (1.05, 1.11)  Q5: OR = 1.08 (1.05, 1.11) | | Not reported | **100 m buffer:** Positive  — higher NDVI associated with higher odds of being ≥150 min/week physically active outdoors  **300 m buffer:** Positive  — higher NDVI consistently associated with greater odds of outdoor PA ≥150 min/week  **500 m buffer:** Positive  — higher NDVI associated with higher odds of outdoor PA ≥150 min/week, effect slightly smaller than 100–300 m buffers  **1000 m buffer:** Positive  — higher NDVI associated with higher odds of outdoor PA ≥150 min/week, weaker than smaller buffers **3000 m buffer:** Positive  — higher NDVI associated with higher odds of being ≥150 min/week physically active outdoors, but weakest |
| Yang et al.,  2025 | Hong Kong | Cross-sectional | 683 | Community-dwelling adults in four Hong Kong communities;  18–65 years | Sentinel-2 Level-2A imagery | 10 m | ranging from 100 m to 1500 m with a  100-meter increment | Continuous MET-hours/week (total physical activity). | IPAQ short form | Structural Equation Modeling | Age,  gender,  education,  employment,  income;  latent covariates for neighborhood cohesion,  health constraints to PA,  COVID-19 constraints;  covariates entered into PA and mental health equations. | SEM path coefficients (standardized β and observed B) | Real greenspace use → PA: β = 0.132, S.E. = 0.022 (positive, significant).  – Perceived air pollution → PA: β = 0.119, S.E. = 0.026 (positive, significant).  – Perceived noise → PA: β = −0.025, S.E. = 0.014 (negative, significant with caveat).  – Perceived greenspace → PA: β = 0.058 (direct path not significant). | | | |
| Dadvand et al.,  2014 | Spain | Cross-sectional | 3,178 | Schoolchildren  (grades 4–6)  9–12 years | Landsat 4–5 TM satellite imagery | 30 m | 100 m,  250 m,  500 m,  and 1,000 m  around each home address. | Sedentary behavior (non-educational screen time)  as an inverse proxy of PA (binary “excessive screen time”) | Parent-reported average daily TV/computer/video-game time;  excessive screen time defined as >1 hr on each weekday and >2 hr on each weekend day. | Logistic mixed-effects models | Child’s sex and age,  parental education,  school type (public/private),  siblings. | Adjusted odds ratio (OR) | excessive screen time, adjusted OR [95% CI]):  • 100 m: 0.85 (0.77, 0.93);  250 m: 0.84 (0.75, 0.94);  500 m: 0.85 (0.74, 0.97);  1,000 m: 0.89 (0.79, 1.00). | | **100 m**  p < 0.05.  **250 m**  p < 0.05.  **500 m**  p < 0.05.    **1,000 m**  p < 0.05 (starred in | **100 m**  (NDVI–PA): Negative for sedentary behavior **250 m**  (NDVI–PA): Negative for sedentary behavior  **500 m**  (NDVI–PA): Negative for sedentary behavior  **1,000 m**  (NDVI–PA): Negative for sedentary behavior |
| Liu et al.,  2024 | China | Cross-sectional | 719 | Community-dwelling adults from  34 Guangzhou communities.  ≥19 years | Landsat 7–8 satellite images | 30 m | 1 km Euclidean buffer around  residence and workplace | Time spent on outdoor physical activity  (hours/week). | Self-reported past-week outdoor PA during home interview. | SEM estimating direct and indirect (mediated) paths | Age,  sex,  education,  marital status,  occupation,  smoking,  alcohol use,  household income,  household size,  district; a  ntihypertensive use included in BP models. | Not reported |  |  |  | Null (not significant). |
| Jia et al.,  2018 | China | Cross-sectional | 1,944 | Middle-aged (40–59) and  older (≥60) | MODIS 16-day composites | 250 m | None | Binary indicator of moderate/high physical exercise (2–7×/week) vs low (0–1×/week),  running/biking/climbing; ball sports; gym workout).  assessed separately for five types (walking/square dancing; morning exercise/Tai Chi; | Interviewer-administered IPAQ short form items  on exercise type and weekly frequency. | Mixed-effects logistic regression | Age,  gender,  education (per DAG). | Adjusted odds ratios (OR) | (NDVI→PA, by exercise type; OR [95% CI]; p-value):  • PE1 (walking/square dancing): 3.71 (1.95, 7.03); p < 0.01.  • PE2 (morning exercise/Tai Chi): 2.11 (1.95, 7.03); p < 0.01.  • PE3 (running/biking/climbing): 2.11 (1.95, 7.03); p < 0.01.  • PE4 (ball sports): 1.08 (1.05, 2.03); p < 0.05.  • PE5 (gym workout): 1.23 (0.85, 2.33); ns. | | | Positive for 4 of 5 PA types (PE1–PE4);  null for PE5 (gym). |
| Hu et al.,  2022 | China | Cross-sectional | 2,021 | Adults  mean age 57 ± 12 years | MODIS (Terra MOD13Q1, V6) | 250 m | 250 m and 1,000 m (primary);  500 m used in sensitivity analyses. | Frequency of outdoor aerobic exercise (≥1 h) per week. | Self-reported questionnaire | Multivariable linear/mixed models | Age,  sex,  BMI,  Smoking, alcohol, education,  meat consumption, urbanization;  plus sensitivity adjustments for hypertension,  diabetes,  medications,  lipids,  multi-pollutants,  SES | | people living in greener areas reported more frequent outdoor exercise  (e.g., ≥3×/week was 24.6% in the lowest greenness quartile vs 41.9% in the highest),  consistent with a direct greenness→activity effect. | | | |
| Yang et al.,  2021 | Hong Kong | Longitudinal (natural experiment, DiD) | 661 | General urban residents recruited in  public open spaces of selected tertiary planning units (TPUs).  All ages | Landsat 5 | 30 m | Not applicable | Minutes/week of leisure-time physical activity (LTPA) in  (1) neighborhood,  (2) country parks,  (3) at home, and  (4) total LTPA. | Face-to-face survey | Parametric DiD regression | age group,  gender,  education,  family income;  population density,  number of indoor recreation facilities,  street connectivity,  land-use mix | DiD estimator | • Neighborhood LTPA: +37.914 min/wk (DiD)  • Country-park LTPA: +19.644 min/wk (DiD)  • At-home LTPA: +21.040 min/wk (DiD)  • Total LTPA: +78.598 min/wk (DiD). | Not reported | • Neighborhood LTPA: p=0.025*  • Country-park LTPA: p=0.101  • At-home LTPA: p=0.016*  • Total LTPA: p=0.003**. | Positive—  greener neighborhoods experienced a smaller decline |
| Klicnik et al.,  2022 | Canada |  | 36,580 | Community-dwelling middle-aged and older adults from the CLSA.  45–85 years at baseline | CANUE platform | Not Reported | 1000 m circular buffer | Ordinal total weekly physical activity  (low, moderate, high). | Modified Physical Activity Scale for the Elderly (PASE);  frequency × duration converted to minutes/week;  categories derived;  sedentary time also assessed. | Ordinal logistic regression | Household income,  education level,  functional ability (OARS). | Adjusted odds ratios (OR) | Females <65 y: Q3 OR 1.2 (1.1–1.3); Q4 1.1 (1.0–1.2).  Males <65 y: Q2 1.3 (1.2–1.4); Q3 1.1 (1.0–1.2); Q4 1.1 (1.0–1.2).  Males 65–74 y: Q2 1.4 (1.2–1.6); Q3 1.4 (1.2–1.6). | | p<0.05 | Positive overall—  higher greenness associated with higher odds of moderate/high PA  (strongest in <65 y groups). |
| Tilt et al.,  2007 | USA | Cross-sectional | 529 | Community-dwelling adult residents sampled  across strata of accessibility and greenness.  Adults | Landsat 5 | 30 m | Mean NDVI within the walkable neighborhood  (~0.4-mile network service area)  operationalized as an equivalent circular area  (~0.32 square miles) around each residence. | Walking trips per month to  neighborhood destinations (composite). | elf-reported frequency to listed destinations | Pearson correlations;  multiple linear regression (PROC GLM) | Age,  gender,  education,  household income. | Linear regression coefficient (β) | β = −3.715 walking trips/month per 1.0 NDVI unit | SE = 5.746 | 0.518 | Null  (objective NDVI not associated with walking trips);  by contrast, subjective greenness showed a positive association with walking. |
| Lu et al.,  2025 | China | Cross-sectional | 3,557 | University campus users | National Tibetan Plateau Data Center | 50 m | NA | total number of walking  trajectories per grid. | Crowdsourced GPS trajectories from the Dorray fitness app;  data from 2017–2018. | Gradient-boosted trees (XGBoost) | 21 macro-scale built-environment variables  (POI accessibility, density, land-use, spatial network, natural environment—including NDVI)  plus 6 street-view variables  (GVI, SVI, VMI, sidewalk ratio, humanization, Shannon diversity). | NR | it does not report an extractable effect size with a CI/SE, so it can’t be pooled in a standard quantitative meta-analysis | | |  |

**Table D2. Proximity studies (n = 39).**

| **Study Identification & General Info** | | **Study Design & Population** | | | **Exposure Details** | | | | | | **Physical Activity (PA) Outcome Details** | | **Statistical Analysis & Results** | | | | | | |
| --- | --- | --- | --- | --- | --- | --- | --- | --- | --- | --- | --- | --- | --- | --- | --- | --- | --- | --- | --- |
| Study | Country / Region | Study Design | Sample Size | Population | Proximity Metric | Greenspace  Definition | Greenspace  Data Source | Measurement Method | Threshold Used | Spatial Level /  Unit of Analysis | PA Outcome Type | Measurement Method | Statistical Model | Covariates Adjusted For | Effect Estimate Type | Effect Estimate | 95% Confidence  Interval / Standard Error | p-value | Direction of Association  (positive, negative, null) |
| Bird et al.,  2016 | Canada | Cross-sectional | 380 | Children at risk of obesity  8–10 years | Presence/type of nearby park(s) within a walking street-network buffer. | Parks and open spaces | CanMap | Street-network (walking) buffers to identify nearby parks;  no travel-time modeling. | 500 m network buffer (up to 3 parks);  if none, 1,000 m (1 park). | Child level linked to nearby parks | Self-reported: (i) Mean weekly 15-min bouts of PA; (ii) Variety of different activities.  Objective: Accelerometer-based PA (sedentary, light, vigorous, MVPA; binary “meeting 60 min/day MVPA”). | Self-reported: Interviewer-administered youth PA recall (3 seasonal recalls; averaged).  Objective: ActiGraph accelerometer (model 7184), ≥4 days with ≥10 h/day wear. | Linear regression for self-reported continuous PA outcomes;  logistic/linear for objective PA and adiposity | Household income,  sex,  age,  puberty initiated | β coefficient | Park Type VIII (very esthetically pleasing, few team-sports) vs reference (Type I). +5.2 | 90% CI: 2.3 to 8.1 | p< 0.05 | Positive for self-reported bouts of PA (Type VIII vs reference).  No significant associations for objective PA. |
| Schipperijn et al.,  2017 | Belgium  Brazil  Czech Republic  Denmark  Mexico  New Zealand  UK  USA | Cross-sectional | 6181 | Adults  18–66 years. | Perceived proximity (NEWS item; 5-point walking time to nearest park). | Government-designated park | Local park polygon datasets | Street-network buffers & distances | 1 km & 500 m buffers | Participant home-based buffers; neighborhoods defined by administrative units (~US Census block groups, 500–3,000 residents) | Hip-worn accelerometers for 7 days | Leisure-time walking (LTW)  and other LTPA | Generalized Additive Mixed Models (GAMMs) | Age  gender  education,  marital status  employment  city  accelerometer wear time | Odds Ratios (OR) |  |  |  | positive with MVPA, LTW, and other LTPA. |
| Kaczynski AT et al.  2014 | USA | Cross-sectional | 893 | Adults  18–98 years | Distance to closest park;  number of parks within 1 mile;  total park acreage within 1 mile. | City park | City of KCMO parks directory + on-site audits (n=146). | Street-network distance  1-mile network buffer  nearest park via park centroid. | Closest park <0.5, 0.5–1, >1 mile  1-mile buffer for counts/acreage. | Individual  multilevel with census tract as level-2. | Any park-based PA in a usual week. | Self-report  (PA-PS questionnaire). | Multilevel logistic regression | Gender,  age,  race,  income,  BMI. | Odds ratio. | 0.50 (0.25–0.99) | 1.21–5.31. | <0.05 | Positive |
| Jilcott et al.,  2007 | USA | Cross-sectional | 184 | Under/uninsured midlife women  40-46 years | (a) GIS network distance (miles) to nearest park/gym/school  (b) count of each resource within 1- & 2-mile buffers;  (c) perceived distance (miles) & perceived existence within a 10-min drive | Parks/trails | County/city parks & recreation lists;  internet verification  geocoded points | GIS road-network distance; Euclidean 1–2 mile buffers; surveys for perceptions | 1-mile buffer for main models (2-mile used for agreement only);  “neighborhood” = 10-min drive (perceived) | Individual home address;  buffers around residence | Minutes/day of MVPA | Accelerometer (ActiGraph | Multiple linear regression | Age,  BMI intervention group, race  Education  Income  smoking | Standardized β | Objective proximity (distance to nearest park, GIS): standardized β = –0.05; p = 0.56 → null.  Perceived proximity (distance to nearest park): standardized β = 0.02; p = 0.81 → null.  Objective availability (no. of parks in 1-mile buffer): standardized β = –0.06; p = 0.41 → null.  Perceived availability (park exists in neighborhood): standardized β = 0.08; p = 0.34 → null. | | | |
| Sun Y. et al.  2023 | USA | Retrospective cohort | 415,020 | Urban singleton pregnancies (KPSC members)  Mean 30.2 ± 5.8 | Euclidean distance (km) to nearest park | (total; tree; low-lying vegetation; grass) | Bing Maps Street View  MODIS Terra (MOD13Q1)  NLCD  CPAD (parks) | Residential circular buffers (200/500/1000 m) + straight-line park distance | Within 500 m to park (binary); continuous exposures per IQR | Individual residence  (ZIP code random effect) | Minutes/week during pregnancy | Self-reported in EHR at prenatal visits | Multilevel logistic regression  multiple linear regression (PA vs green space) | Maternal age  race  education  block-group income (main)  smoking  season  year  insurance  preterm birth  BMI | OR per IQR (PPD)  % change in PA per 10% increase in green space | Proximity to park (distance / within 500 m): null (ns; exact OR NR) | | | null for park proximity |
| Kaczynski et al.,  2008 | Canada | Cross-sectional | 380 adults;  33 parks | Adult neighborhood residents  18–88 | Euclidean distance from homes to park centroid | Neighborhood public parks | Municipal GIS (parks) | Euclidean distance  address geocoding to (x,y) | None | Park level | Any park-based PA occurrence | 7-day self-reported PA logs with open-ended location coding | Binary logistic regression | Perceived neighborhood safety  perceived neighborhood aesthetics | Odds ratio (OR) | Average distance to park: OR 1.02 (0.83–1.29), ns | |  | Null |
| Kaczynski et al.,  2009 | Canada | Cross-sectional | 384 | Adult neighborhood residents  18–89 | (1) Number of parks within 1 km  (2) Total park area within 1 km  (3) Distance to closest park. | Municipal neighborhood parks | Municipal planning/GIS maps and municipality database. | Euclidean distance using park/home centroids | 1-km buffer for exposure | Individual  (participant home). | Moderate-to-strenuous PA (MSPA)  total  neighborhood-based  park-based. | 7-day self-reported PA log | Binary logistic regression | Age,  sex,  BMI,  temporary injury. | Odds ratio (OR) | (OR=1.05, 95% CI 0.86–1.32). |  |  | More parks/park area = higher MSPA;  distance to nearest park = null. |
| Petrunoff et al.,  2021 | Singapore | Cross-sectional | 3,435 | Community-dwelling adults  mean 48.8 y | Perceived walk time to nearest park  True (objective) network distance to nearest accessible park boundary | Public parks managed by Nparks | NParks geospatial data + mapped “truly accessible” park-boundary points;  citywide walkable street network | Street-network distance from home to nearest accessible boundary point | NR | Individual | Park physical activity time | Interviewer-assisted survey | Multiple linear regression | Age,  gender,  ethnicity,  marital & work status,  income,  education,  BMI,  chronic diseases,  smoking,  heavy alcohol,  500-m walkability index | β | Access → park PA time (adjusted)  Perceived access (ref 1–5 min): 6–10 min +0.10 (−1.66, 1.86); 11–20 min −1.69 (−3.82, 0.43); >20 min −0.73 (−3.65, 2.18)  True access (ref 0–399 m): 400–799 m −2.43 (−5.04, 0.19); 800–1599 m −2.62 (−5.28, 0.03); ≥1600 m −1.09 (−3.82, 1.64) | | Overall ns (perceived p=0.386; true p=0.125) | Null (no association of perceived/true proximity with park PA time) |
| Cohen et al.,  2007 | USA | Cross-sectional | 14,791 | Adults  18–84 years | Residential distance to park | Public urban neighborhood parks | City of Los Angeles parks | Euclidean buffers/radii in ArcView | ≤1 mile | Individual | Weekly leisure exercise sessions | Self-reported survey (adults);  separate SOPARC area observations for activity levels | Negative binomial regression | Age,  gender,  race/ethnicity,  perceived safety,  park fixed effects | IRR | IRR=1.38 | 95% CI 1.04–1.84 | p<0.001 | Positive (closer distance → more exercise) |
| Lackey et al.,  2009 | Canada | Cross-sectional | 574 | Community-dwelling adults  18–88 years | Perceived: self-reported walk time to nearest park, converted to distance categories  Objective: GIS distance from home to closest park centroid; both dichotomized at ≤750 m vs >750 m | Public parks | Municipal GIS; park features audited via EAPRS | Euclidean (straight-line) GIS distance to park centroid | 750 m | Individual | Any neighborhood-based PA (yes/no)  Any park-based PA (yes/no) | 7-day self-reported PA logbooks with location | Logistic regression | Age,  gender,  self-efficacy,  perceived safety,  aesthetics,  cohesion | Odds ratio (OR) | Objective proximity ≤750 m → Neighborhood PA: OR = 1.12 (sig.), (1.01–1.25)  Objective proximity ≤750 m → Park-based PA: OR = 0.96 (ns), (0.69–1.33)  Perceived proximity ≤750 m → Neighborhood PA: OR = 0.90 (ns), (0.47–1.72)  Perceived proximity ≤750 m → Park-based PA: OR = 1.10 (ns), (0.75–1.47)  Match (perceived=objective ≤750 m) → Park-based PA: OR = 1.63 (sig.), (1.29–2.02) | | | Objective proximity → Neighborhood PA: positive  Objective/perceived proximity → Park-based PA: null  Match → Park-based PA: positive |
| Dias et al.,  2019 | Brazil | Cross-sectional | 1130 | High school adolescent  14–20 years | Street-network distance (m) from home to nearest park | Municipal public parks | Municipal Department of Urbanism shapefiles | Street network | None (continuous distance) | Individual | Park use for PA (yes/no) | Self-reported questionnaire | Linear regressions | Sex;  socioeconomic status | Unstandardized coefficients (β) | B = −40.997 m | −119.373 to −2.246 | 0.005 | park use are each associated with shorter home-to-park distance |
| Toftager et al.,  2011 | Denmark | Cross-sectional | 11,092 | Community-dwelling adults  16+ | Self-reported distance to nearest green space | park/urban green space/forest | Self-administered questionnaire | Perceived categories | <300 m  300 m–1 km  >1 km | Individual | (1) Using green space to exercise/keep in shape (yes/no)  (2) Moderate/Vigorous leisure-time PA (yes/no) | Self-report interview/questionnaire | Multiple logistic regression | Sex  age  education  accommodation type  municipality size  long-term activity limitation | Odds ratio (OR) | Use green space to exercise ( >1 km vs <300 m ): OR 0.71 , 0.60–0.83 , p<.05 , Negative  Leisure-time MVPA ( 300 m–1 km vs <300 m ): OR 0.88 , 0.79–0.98 , p<.05 , Negative  Leisure-time MVPA ( >1 km vs <300 m ): OR 0.85 , 0.70–1.04 , ns , Null | | | Farther perceived distance generally associated with lower odds of green-space exercise and MVPA (significant for 300 m–1 km vs <300 m). |
| Ribeiro et al.,  2015 | Portugal | Cross-sectional | 532 | Older adults  ≥65 | Distance (hectometers; 1 hm = 100 m) from home to nearest park | Public parks  (24 parks in municipality) | Municipal GIS | GIS distance | None | Individual | Leisure-time PA (LTPA) | EPIPorto PA Questionnaire | linear regression | Ag  education  marital status  retirement  ≥20 years in Porto  comorbidities  BMI  smoking | β (linear coefficients for log LTPA);  OR for participation | Women (active): Distance to nearest park β = −0.0262; p = 0.029 (per 1 hm = 100 m)  Women (active): Distance to nearest non-residential destination β = −0.0735; p = 0.019  Men (active): Distance to nearest sport space β = 0.0462; p = 0.032 | NR |  | Greater distance → less LTPA time in women (parks; destinations);  no greenspace distance effect on participation;  counterintuitive positive for men with sport spaces |
| Xiao et al.,  2022 | China | Cross-sectional | 4,555 | Older adults  50–95 | Park proximity = distance (km) from community centroid to nearest park | Urban public parks | City cadastral park map | GIS distance from community geometric center | None | Individual | Recreational PA  Active transportation | WHO GPAQ (self-report) with MET conversion | Two-part multilevel | Self-rated health,  gender  marital status  education  job  income  age  road density  distance to public transport  community area  land-use mix  PA at work | linear β (with t) | Recreation amount vs. park proximity (linear): β = −0.038; p<0.001 (t=−3.78). | | | Closer parks → higher recreational PA |
| Zuniga-Teran et al.,  2019 | USA | Cross-sectional | 412 | Community-dwelling adults  18+ | Perceived distance to nearest greenspace (¼ mile, ½ mile, >½ mile)  perceived walkability (traffic safety, surveillance community  land-use)  mode to greenspace (walk/bike/drive) | Urban greenspace/parks | Self-report (perceived distance) | Perceived categorical walking distance | ¼ mile (~5-min walk),  ½ mile (~10-min walk),  >½ mile | Individual | PA-related behavior proxy | Self-report binary items for each frequency level | Binary logistic regressions | Age  gender  ethnicity  income  education  children at home  dog walking  car access  time in neighborhood  perceived walkability  self-reported physical activity | Odds ratio | Greenspace users — Proximity → Daily visitation: OR 6.298 (β=1.840, SE=0.831); p<0.05; positive.  Mode (selected): Residents walking→Daily OR 3.556 (p<0.10); Users biking→Weekly OR 21.513 (p<0.05); Users driving→Weekly OR 40.215 (p<0.01). | | | |
| Dadvand et al.,  2016 | Spain | Cross-sectional | 3,461 | Community-dwelling adults  ≥18 years | Subjective proximity: park within 10-min walk (yes/no)  Objective proximity: home within 300 m of major green space (≥5,000 m²) (yes/no) | Major public green spaces | Barcelona Parks & Gardens map | Objective proximity via Euclidean distance | 10-min walk (subjective);  300 m (objective) | Individual | Moderate/high PA vs low (binary) | IPAQ-Short (self-report) | Logistic regression | Age  sex  education  neighborhood SES (household income tertiles) | Odds ratio | Subjective proximity (10-min park): OR 1.52 | 1.05–2.19 | <0.05 | Positive  Objective proximity (≤300 m, ≥5,000 m²): OR 1.33 | 0.96–1.83 | 0.10 | Null (ns) | | | Closer/perceived access → higher odds of moderate/high PA (objective proximity ns). |
| Sugiyama et al.,  2013 | Australia | 4-year longitudinal cohort | 1,036 | Community-dwelling adults  Adults | Perceived presence (1–4), quality (1–4), proximity to parks (1–5; shorter=larger score).  Objective access/amount: total green-space area, largest park area, and number of spaces within 1,600 m buffer. | Accessible recreational green spaces ≥500 m² | Local maps/GIS identification of accessible spaces. | Perceptions via survey  objective crow-fly (Euclidean) 1.6-km neighborhood-center buffer  areas in hectares. | 1,600 m buffer; objective ORs per 10 ha increase; perceived scales per unit increase. | Individual | Initiation of recreational walking | Self-report days/week walking ≥10 min | Multilevel logistic regression | Age,  gender,  work status,  marital status,  walking for transport,  TV time;  sea-boundary index (for GIS measures)  psychosocial factors in sensitivity. | Odds ratio | Initiation: All GS attributes ns (e.g., perceived presence OR 1.19; 0.83–1.71).  Maintenance:  Perceived presence OR 1.84 | 1.13–2.99 | <0.05 | Positive  Perceived proximity OR 1.67 | 1.12–2.49 | <0.05 | Positive  Total GS area (per 10 ha) OR 1.03 | 1.00–1.06 | <0.05 | Positive  Largest park area (per 10 ha) OR 1.10 | 1.02–1.20 | <0.05 | Positive  Number of spaces: OR 1.02 | 0.998–1.04 | ns | Null | | | GS attributes predict maintenance, not initiation, of recreational walking. |
| Van Cauwenberg et al.,  2017 | Australia | Cross-sectional | 2,700 | Mid-older adults  55–65 years | Perceived walking time to nearest park | Neighborhood parks | Self-report | Self-reported walk time categories | 1–5,  6–10,  11–20,  21–30,  ≥31 minutes  (treated as ordinal) | Individual | (1) Recreational walking  (2) Other recreational MVPA (non-walking) | IPAQ-Long | Zero-inflated negative binomial with robust Ses | Age,  gender,  education,  retirement status,  functional limitations,  area-level SES,  area of residence  reciprocal PA outcome | Odds ratio | OR=1.08 per 1 category closer (mean social trust/cohesion)  OR=1.18 per 1 category closer (+1 SD social trust/cohesion) | • 1.01–1.15 (mean trust)  • 1.06–1.28 (high trust) | <0.05 (both) | Positive for participation in recreational walking when social trust/cohesion is average or high; no effects for other recreational MVPA. |
| Yi et al.,  2021 | USA | Longitudinal | 192 Children | School-age children  8–13 y | Proximity: street-network distance (km) to nearest park  Accessibility: park density (count), park coverage (% parkland in buffer) | Public parks & open space | LA County Parks & Recreation GIS (Jan 2019) | Sausage Network Buffer (SNB) around home: 500 m (primary), 1 km (sensitivity);  network distance for proximity | Continuous | Individual | Daily MVPA minutes | ActiGraph (AGT3X) | 3-level linear mixed-effects | Baseline age  wave-based age  sex  ethnicity  income (per wave)  baseline BMI-z  weekday/weekend,  daily wear time  valid days/wave  neighborhood walkability z-score  neighborhood poverty  compliance dummies | Exponentiated coefficient (ratio of means) | Park density (per +1 park): 1.08; 95% CI 1.01–1.15; p < 0.05 → positive  Park coverage (per +1%): 1.01; 95% CI 1.00–1.03; p < 0.05 → positive  Proximity (per +1 km farther): 0.88; 95% CI 0.78–0.99; p < 0.05 → negative  Longitudinal interaction (coverage × age × weekend): 1.02; 95% CI 1.01–1.03; p < 0.05 → slower decline on weekends with higher coverage | | | Positive (density, coverage); Negative (greater distance); Weekend buffering effect for coverage |
| Bozkurt  2021 | Turkey | Cross-sectional | 2,668 | Primary, middle, and high school students  6–18 y. | UGS within walking distance (≤15-min, yes/no)  number of UGS within walking distance; perceived overall UGS quality | Neighbourhood parks/green spaces reachable within ~15-min walk from home | Self-report questionnaire | Perceived walking time (minutes),  counts | Availability (yes/no);  count (continuous) | Individual | proxy PA variable: “visits UGS for physical activity” (yes/no) | Self-reported questionnaire. | Multilevel mixed-effects logistic regression | Age,  gender,  parental education  gated community  years in neighbourhood  UGS availability/number/quality,  regular sports/PA  random intercepts for class and school. | Odds ratio | No UGS in proximity → odds of visiting UGS: OR = 0.192 | 0.151–0.244 | <0.001 | negative (proximity supports visits). | | | |
| Kowaleski-Jones et al.  2017 | USA | Cross-sectional | 2,706 | Youth  6–17 years | Average distance (miles) to 7 nearest parks (population & park-size weighted) | Public parks & forests | ESRI ArcGIS 9.3 park layer (2006) | GIS Euclidean distance  (centroid-to-park) | Continuous | Census-tract exposure;  individual PA outcome | Minutes/day of MVPA | Accelerometer  (ActiGraph; 4–7 days) | Survey-weighted linear regression (SAS) | Age  sex  race  immigrant status  income-to-poverty ratio  neighborhood SES composite  % White residents  plus density  street connectivity,  % walk/bike to work,  neighborhood age | Regression coefficient | Children 6–11 (total): β = −4.31 min/day per mile  Teens 12–17 (total): β = −1.43 min/day per mile  Teens 12–17 (males): β = −2.34 min/day per mile | NR | 6–11 total p<.01;  12–17 total p<.05;  12–17 males p<.01 | Negative  (greater distance → less PA) |
| Witten et al.,  2008 | New Zealand | Cross-sectional | 12,529 | Adult  15–24,  25–44,  45–64,  ≥65 | GIS network car travel time (min) from meshblock centroid to nearest park | Public parks | LINZ; Dept. of Conservation (parks) | Road-network travel time by car (ArcInfo) | Parks quartiles:  <0.8,  0.8–1.4,  1.4–2.4,  >2.4 min | Neighbourhood: exposure  individual outcomes | (1) Sedentary (<30 min PA in past week)  (2) Recommended PA (≥2.5 h on ≥5 days in past week) | Self-reported questionnaire. | logistic regression | Design vars (sampling/ethnicity/household),  sex,  age groups  education,  social class,  benefits,  employment,  household income  area deprivation  urban/rural | Odds ratio | Parks → Sedentary: Worst vs best OR 0.84 (0.63–1.11) — NS.  Parks → Recommended PA: Worst vs best OR 1.15 (0.96–1.37) — NS. | | | Parks: essentially null after adjustment (some counter-intuitive crude signals attenuate). |
| King WC et al.,  2005 | USA | Cross-sectional | 158 | Overweight/obese postmenopausal women  52–62 years | “Within walking distance” defined as ≤1,500 m along road network to destinations (binary yes/no) | Public parks;  walking/biking trails | GIS layers (Southwestern Pennsylvania Commission) + geocoded home addresses | Street-network distance | 1,500 m cutoff;  destination count 0–7 | Individual outcome;  neighborhood exposure within 1,500 m network buffer | Steps/day (total PA) | Pedometer (Yamax Accusplit) | Multiple linear regression | Age,  race/ethnicity,  education,  smoking status,  BMI | β | Golf course within 1,500 m: β = 7.01, SE 3.31, p=0.036 (positive)  Park within 1,500 m: NS (not significant; not retained in multivariable)  Walking/biking trail within 1,500 m: NS (bivariate only) | | | Positive for destinations retained (golf course, post office); parks/trails = null |
| Rodríguez et al.,  2012 | USA | Repeated-measures observational | 293 | Adolescent females  15.3–17.6 years | Presence of park within a 50 m buffer around each minute-level GPS point | Public parks | County/municipal GIS park layers | Euclidean circular buffer (50 m) around each GPS point;  population density from census block | NA | GPS point (per minute) with 50 m buffer;  home-neighborhood covariates in 800 m buffers | Intensity category  (sedentary / light / MVPA) | ActiGraph 7164 (30-s epochs aggregated to 1-min)  Garmin Foretrex 201 GPS  points within 60 m of home/school excluded | Random-intercept multinomial logistic regression | Age  race  free/reduced lunch  home-neighborhood  population density  jobs  housing ratio  road density % poverty | Odds ratio (OR) | Minneapolis: OR = 1.86 (95% CI 1.51–2.31), p<0.01 (positive)  San Diego: OR = 0.80 (95% CI 0.64–1.00), ns at p<0.01 (null/negative borderline); parks → light vs sedentary: OR = 1.41 (95% CI 1.15–1.74), p<0.01 (positive) | | | Positive for MVPA in Minneapolis; positive for light (but not MVPA) in San Diego |
| Motomura et al.,  2024 | Japan | Cross-sectional | 276 | Older Community-dwelling adults  65–84y | Distance to nearest & second-nearest park; count of parks within buffers | Public parks/green spaces per Japan’s National Urban Park Law | National Land Numerical Information (Japan) | GIS, street-network distances & buffers | 800 m and 1,600 m network buffers | Individual residence–centered buffers | Light PA (min/day);  MVPA (min/day);  Sedentary time (min/day);  Breaks in sedentary behavior (times per sedentary hour) | Accelerometer  (Omron Active Style Pro HJA-350IT) | Multiple linear regression | Age,  gender  economic status  education,  living/marital/working status,  length of residence  number of chronic diseases,  depression,  accelerometer wear time | Unstandardized coefficient (B) | Count of parks within 1,600 m → Breaks per sedentary hour: B = 0.31, 95% CI 0.02–0.59, p<0.05, positive  All other park–outcome associations (LPA, MVPA, sedentary time; other park metrics): NS (null) | | | |
| Van Cauwenberg et al.,  2015 | Australia | Cross-sectional | 2700 | Community-dwelling mid-older adults  57–67 y | Perceived walking time to nearest park (NEWS; 1–5 scale) | Neighbourhood public parks | Self-reported (perception-based) | Perceived walking-time categories | 5-category Likert | Individual-level | Recreational walking (min/week)  Other recreational MVPA (min/week) | IPAQ-Long | Zero-inflated negative binomial | Age  area-level SES  the alternate PA outcome | OR | Proximity → recreational walking (participation): OR = 0.91 (0.85–0.98), p<0.01 → positive for participation  Moderator (retirement) on proximity→participation: interaction OR = 1.22 (1.05–1.43), p<0.05; non-retired: OR = 0.86 (0.79–0.94), p<0.01; retired: OR = 1.06 (0.95–1.19), n.s. | | | Proximity ↑ → more likely to walk (non-retired only) |
| Jáuregui et al.,  2016 | Mexico | Cross-sectional | 659 | Community-dwelling adults  20–65 y | Perceived proximity to large (“metropolitan”) parks  perceived easy access to small (“neighborhood”) parks (ANEWS) | Neighborhood (small) and metropolitan (large) public parks | Self-report | Perception questionnaire | ANEWS scale units (Likert) | Individual-level | Total MVPA (min/week)  MVPA in ≥10-min bouts (any vs none; min/week among doers) | ActiGraph GT3X accelerometer | Linear regression | Sex  age  marital status  individual SES  motor-vehicle ownership  education  accelerometer wear time | exp(B) | **Total MVPA:**  **Easy access to small parks:** exp(B)=1.16 (95% CI 1.01–1.35), p<0.05 → positive  **Proximity to large parks:** exp(B)=1.12 (1.06–1.18), p<0.05 → positive  **MVPA within bouts—Any (logit):**  Proximity to large parks × female: exp(B)=1.69 (1.13–2.53), p<0.05 → positive; men: n.s.  **MVPA within bouts—Minutes (among doers):**  **Proximity to large parks**: exp(B)=1.12 (1.01–1.24), p<0.05 → positive | | | |
| Sugiyama et al.,  2014 | 12 countries  AUS  BEL  BRA  COL  CZE  DEN  HKG  MEX  NZL  ESP  UK  USA | Cross-sectional | 13,745 | Community-dwelling adults  18–66 y | Perceived proximity to the nearest park | Public parks | Self-report | Perception questionnaire | Likert scale | Individual-level | Recreational walking—participation (any vs none),  frequency (days/week),  duration (min/week) | IPAQ-Long | Generalized additive mixed models | Age  gender  education  work status  marital status  area-level SES  study site | OR for participation  exp(β) (proportional change) for frequency/duration among walkers | Any recreational walking: OR 1.07; 95% CI 1.03–1.11; p=0.031 → positive  Frequency (days/week, among walkers): exp(β) 1.01; 95% CI 0.99–1.02; p=0.213 → null  Duration (min/week, among walkers): exp(β) 1.01; 95% CI 0.99–1.04; p=0.344 → null | | | |
| Thornton et al.,  2017 | USA | Cross-sectional | 726 | Community-dwelling older adults  66–97 y | Distance (m) to closest park  count of parks within 1-km buffer | Public parks | Local park agency lists & parcel land-use data (GIS) | 1-km street-network home buffer (counts);  distance to nearest park (m) | 1-km buffer | Individual residence buffers | Accelerometer MVPA (min/day)  self-reported walking for errands (min/week)  leisure/exercise walking (min/week) | Actigraph accelerometer (7 days)  CHAMPS questionnaire (weekly minutes) | Mixed-effects regressions | Age  Sex  race  BMI  household size  license  census variables  health conditions  wear time/site | B×SD (standardized change in outcome per 1 SD increase in predictor) | Distance to closest park → MVPA: B×SD = −1.81; 95% CI −2.85 to −0.77; p=0.001; negative (i.e., closer parks → more MVPA)  Parks (any) → walking for errands/leisure: Null in final models (park variables not retained) | | | |
| Pietilä et al.,  2015 | Finland | Cross-sectional | 2,323 | General urban/suburban residents  15–74 years. | Self-reported distance (km) to nearest built park, forest, larger forest;  GIS % built/green/forest in 1-km radius; km of paths/roads (1-km). | CORINE “green” (agricultural, semi-natural, wetlands)  “forest”; forest treated as recreation-suitable. | CORINE Land Cover (Finnish Environment Institute) | Self-reported distances (km)  GIS 1-km circular buffers (Euclidean). | 1-km buffer for land-cover/paths | Individual residence buffers | (1) Outdoor recreation visits/year  (2) Everyday outings/year (walking/biking for commuting/errands). | Self-report | Path analysis / structural equation modeling | Age  gender  education  % indoor PA  distance to forest  % built | Standardized β | Suburbs—  OR visits→health β=0.083;  Everyday outings→health β=0.143;  Dist. to forest→OR visits β=−0.082. | NR | OR→health p<0.05;  EO→health p<0.001;  Dist. to forest→OR p<0.001. | Shorter forest distance ↑ outdoor recreation (positive); higher built % ↑ everyday outings (positive); both PA types ↑ self-rated health; direct environment→health mostly null. |
| Mäki-Opas TE et al.  2016 | Finland | Cross-sectional | 2,098 | Employed, working-age urban residents  30–64 | (1) Euclidean distance from home to nearest greenspace  (2) Proportion of recreational green space around home | Recreational green spaces ≥1.5 ha | CORINE Land Cover 2006 (25 m raster) | Euclidean distance; % green space within home buffer | Distance:  0–199 m vs ≥200 m; | 500 m buffer around home | Commuting PA (walking/cycling to/from work) | Self-report | Survey logistic regression | Age,  gender,  education,  leisure-time PA,  occupational PA | Odds ratio (OR). |  |  | <0.05 | Distance ≥200 m vs 0–199 m became null after full adjustment |
| Coombes et al.,  2010 | UK | Cross-sectional | 6,803 | Urban adults  ≥16 | Road-network distance from home to nearest green space | Public green spaces ≥2 ha | Bristol City Council green space GIS;  OS datasets | Street-network | Quartiles by distance | Individual home location  neighborhood covariates within 800 m road-network buffer | Meeting CMO guideline  (≥30 min moderate PA ≥5×/week) | Self-report | Binary logistic regression | Age  sex  socioeconomic status  self-rated health,  area deprivation  neighborhood walkability  road/junction density  land-use diversity  % walk/bike to work | Odds ratio (OR). | 0.76 (respondent-adjusted model)  0.88 (fully adjusted) | 0.65–0.88 (respondent-adjusted)  0.73–1.06 (fully adjusted) | <0.01 | Positive for access → PA (greater distance = lower odds of meeting PA guideline) |
| Patnode CD et al.  2010 | USA | Cross-sectional | 294 | Children/adolescents  10–17 y | Street-network distance (km) to nearest park, trail access  1-mile walkability index | Public parks; bicycle/pedestrian trails | GIS-derived | Street-network | None | Individual home address  1-mile network buffer (walkability) | MVPA (min/day) | Accelerometer (ActiGraph 7164) | multiple linear regression | Age  race  parent education  free/reduced lunch (SES)  BMI z-score  physical maturation  plus significant individual/social/env. factors | Standardized β  (regression) | Girls: distance to school attended β = −0.20 (full model) | NR | 0.03 | Negative (farther from school → less MVPA in girls); null for distance to parks/trails in both sexes; walkability positive (girls, borderline) |
| Mowen et al.,  2007 | USA | Cross-sectional | 1,515 | Older adults in community settings  50–99 y | (1) Objective Euclidean distance (miles) from home to nearest public park  (2) Perceived park “within walking distance” (yes/no) | Public parks | Geocoded respondent address to nearest park (county park GIS) | Euclidean straight-line distance  perceived walking distance (binary) | None | Individual home address | Daily PA level  (sedentary / moderate / vigorous) | Self-report | Path analysis via OLS regressions | Household income  social support (network size, satisfaction)  park visitation frequency & duration included as mediators | Standardized β | Distance → PA:  β = −0.042 (ns)  Perceived walking-distance → PA:  β = 0.025 (ns)  Park visitation frequency → PA:  β = 0.136 (significant) | NR | Distance p=0.354  Perceived walking-distance p=0.581  Frequency p=0.003 | Null for proximity → PA  Positive for park visitation frequency → PA |
| Magalhães et al.,  2017 | Portugal | Longitudinal cohort | 969 | School-based adolescent cohort  13–17 | Street-network distance from residence to nearest urban green space (UGS) and open sports space (OSS) | UGS ≥2,000 m²,  public/free access,  with PA-suitable facilities | Porto city council maps | Street-network shortest path | ≤400 m;  401–800 m;  >800 m | Individual home address | Leisure-time PA level | Self-report | multinomial logistic regression | Parental education,  body image (final model) | Odds ratio (OR) | UGS ≤400 m vs >800 m predicting stable high (vs stable light):  Girls OR 1.09, 95% CI 0.57–2.11;  Boys OR 1.08, 95% CI 0.51–2.29 (ns). | | NS | Null |
| Mass et al.,  2008 | Netherlands | Longitudinal cohort | 4,899 | General Dutch residents registered with GP practices.  ≥12 years. | % total green within 1 km and 3 km of 6-digit postal-code centroid. | LGN4 25×25 m dominant land-use grid; includes urban, agricultural, and natural green; gardens/small strips excluded unless dominant. | LGN4 (National Land Cover Classification). | Euclidean radial buffers (1 km, 3 km) around postal-code coordinates. | None | Individual home address | Meeting Dutch public-health PA recommendation;  plus domain-specific (leisure walking/cycling, commuting walking/cycling, sports, gardening) | SQUASH self-report questionnaire. | Multivariate multilevel models | Age,  gender,  education,  income,  urbanicity;  garden ownership used in one analysis | Regression coefficient | Meeting PA recommendation (yes/no), % green (1 km): −0.0004 (SE 0.002). | | | Null for guideline attainment. |
| Feng et al.,  2021 | Australia | Cross-sectional | 267,153 | Adults in houses/apartments  ≥45 years | % total green;  % tree canopy;  % open grass within 1.6 km | Tree canopy (evergreen/deciduous) and open grass (2 m land-use classes) | Pitney Bowes 2 m land-use dataset | 1.6 km road-network buffers around residential Mesh Block centroid | Per 10% increment of greenness | Individual home address | (1) Time outdoors (≥2 h weekdays; ≥4 h weekends);  (2) MVPA minutes/week;  (3) % MVPA vigorous (>30%) | Self-report | Multilevel logistic | Age,  sex,  income,  work status,  education,  region of birth | OR (binary) / IRR (minutes) | Houses—per 10% total green:  weekend outdoors OR 1.03;  MVPA IRR 1.01;  ≥30% vigorous OR 1.03 | 1.01–1.05 (weekend OR)  1.00–1.03 (IRR)  1.01–1.06 (vigorous OR) | NR | Positive for houses (total green/tree canopy); null for apartments; open grass negative for MVPA/vigorous |
| Besser et al.,  2021 | USA | Cross-sectional | 72,753 | Community-dwelling older adults  ≥65 years | % developed open space; % forest in census tract | Developed open space (<20% impervious: parks/lawns/golf);  forest (deciduous/evergreen/mixed) | NLCD 2011 (30 m), via NHGIS | NA | Continuous (% per 1-point increase) | Individual outcomes linked to census-tract exposures | Minutes/day of neighborhood walking | One-day travel diary | linear regression | Age,  sex,  education,  income,  race/ethnicity,  employment,  mobility device,  household vehicles,  household size,  homeownership,  population density,  census region,  weekday/weekend,  season,  ADI | β | Forest β=0.028 | 0.006–0.050 | 0.01 | Positive for forest (overall); open space null overall (positive in African Americans) |

**Table D3. Accessibility studies (n = 49)**

| **Study Identification & General Info** | | | **Study Design & Population** | | | | **Exposure Details** | | | | | | **Physical Activity (PA) Outcome Details** | | **Statistical Analysis & Results** | | | | | | | |
| --- | --- | --- | --- | --- | --- | --- | --- | --- | --- | --- | --- | --- | --- | --- | --- | --- | --- | --- | --- | --- | --- | --- |
| Study | Country / Region | Study Design | | Sample Size | Population | Accessibility  Metric | | Greenspace  Definition | Greenspace  Data Source | Measurement Method | Threshold Used | Spatial Level /  Unit of Analysis | PA Outcome Type | Measurement Method | Statistical Model | Covariates Adjusted For | Effect Estimate Type | Effect Estimate | 95% Confidence  Interval / Standard Error | p-value | Direction of Association  (positive, negative, null) |
| Flowers et al.,  2016 | UK | Cross-sectional | | 2079 | working-age adults  22–65 years | Perceived access to local green space | | All vegetated areas >5 m² | Ward-level % local green space from national land-use databases  (England + datasets for Scotland, Northern Ireland, Wales),  linked via Geoconvert  database hosted by CRESH. | self-reported Likert perception of access | Exposure entered as a continuous 1–7 score  (no distance/time threshold). | Individuals linked to ward-level environmental measures | Meeting PA guidelines  (≥600 MET·min/week; binary). | IPAQ-Short Form | Binary logistic regression | Age  gender  subjective health  ward-level road coverage  ward-level environmental deprivation;  active travel to work  active travel to local green space | Odds Ratio (OR) | OR = 0.993 for perceived access →  meeting PA guidelines. | 95% CI 0.856–1.151. | Not significant | Null  (no association between perceived  access and meeting PA guidelines). |
| Ries AV et al.  2009 | USA | Cross-sectional | | 329 | Urban high-school students  Grades 9–12  (mean ~15.6 y) | Perceived park within 5-min drive/10-min walk  objective # of parks within 1 mile | | City parks/greenspace polygons | Baltimore City Dept. of Planning GIS | Euclidean home-centered buffers | 1-mile buffer (parks) | Individual (home buffer);  clustering by census tract & school | Weekly MVPA  (minutes) | Accelerometer (ActiGraph),  7 days | Logistic (park use);  linear mixed effects (MVPA) | Age  sex  race/ethnicity  maternal education  +environmental predictors | β (minutes/week) | Perceived availability: +38.7 min/week | SE ≈ 22.3 | ~0.10 (marginal) | Positive |
| Veitch J. et al.  2021 | Australia | Cross-sectional | | Adults n=1085;  children n=753 | Adults living within 5 km of two parks  parents of children.  Children 2–15 y | Perceived walking time to nearest park;  Child: parks within walking distance (yes/no). | | “Neighbourhood” parks; neighbourhood = within a 10–15 min walk from home. | Self-report survey | Perceived walking-time categories (self-report) | 1–5, 6–10, 11–20, 21–30, 31+ min; child: walking distance yes/no | Individual respondents. | Adults—LTPA (primary), combined TPA+LTPA (secondary);  Children—time outdoors (primary), days meeting 60-min guideline (secondary). | Adults—IPAQ Long Form (self-report);  Children—parent-proxy outdoor time & days meeting guideline (self-report). | OLS / logistic regression | age  sex  education  employment  dog ownership  residential location  child age/sex,  parent occupation/education  location  child independence walking | Standardized indirect effect (a×b via park visitation) | Adults LTPA (primary): 0.028  Children: Time outdoors: 0.017 (95% CI 0.005–0.037)  Days ≥60 min: 0.025 (95% CI 0.006–0.054) | 95% CI 0.014–0.045. | Significant (CI excludes 0). | Positive |
| Colom et al.,  2018 | Spain | Cross-sectional | | 428 | Older adults at high cardiovascular risk  Men 55–80  Women 60–80 | (1) Walkable-network distance to nearest POS  (2) Count and total area of POS within walkable-network buffers | | Public open spaces | City of Palma Municipal Sports Institute (sports),  City Council Dept. of Infrastructure & Accessibility (parks),  Balearic Islands Coastal Observation & Forecasting System (beaches) | Walkable street-network distance/buffers | 0.5 km, 1 km, 1.5 km network buffers;  distance modeled per 100 m | Individual residential address | Total LTPA;  Light LTPA;  Moderate-to-Vigorous LTPA (MVPA) | Validated Spanish Minnesota Leisure-Time Physical Activity Questionnaire (MET·min/day)  self-report | Generalized linear regression | Sex  age  BMI  education  smoking | β coefficient | For total LTPA vs distance to nearest park:  β = 13.39 per 100 m | 4.20 to 22.59 | 0.045 | Positive  (greater distance to park ↔ higher PA) |
| Kondo K., et al.  2009 | Japan | Cross-sectional | | 156 (questionnaire);  112 (accelerometer subset) | Community-dwelling adults  30–69 years | Objective GIS NE (within 500 m)  perceived NE (ANEWS)  perceived accessibility to facilities within 10-min walk (incl. parks) | | Neighborhood parks (within ~10-min walk) | Perceived accessibility (questionnaire)  land-use mapped via field survey + GIS | 500 m Euclidean buffer (ArcGIS 9)  ANEWS (10–15 min walk)  facility accessibility (10-min walk, perceived) | High vs low (median split)  10-min walk; 500 m buffer | Individual home neighborhood (500 m radius) | Total steps/day  walking for leisure  walking for transport  cycling for transport | Accelerometer (steps)  IPAQ (self-report, min/day) | ANCOVA | Age  (and sex in some models) | Adjusted mean difference (accessible vs. not) | Male leisure walking with park access: 26.2 vs 2.7 min/day → Δ = +23.5 min/day  Women — Total steps (accelerometer)  Awareness of “walking places”: 9,488 vs 7,957 steps/day (high vs low), p<0.05. | Group SE ~6.4–6.9 | < 0.05 | Positive (park access ↑ leisure walking in males) |
| Prins et al.,  2011 | Australia | Cross-sectional | | 209 | Adolescents  (school-based cohort).  Mean 14.5 ± 0.6 years. | Counts of parks and sports facilities within  400 m,  800 m,  2000 m of home (Euclidean buffers). | | Public parks/open space | pen Space 2002 GIS dataset | Euclidean buffer counts around geocoded residence. | None | Individual | Weekly minutes of MVPA  (out-of-school time). | Accelerometer (ActiGraph GT1M) | Multilevel linear regression | Gender,  parental education,  population density (plus school clustering). | β coefficient | Parks (count in buffer → MVPA)  400 m: β = 0.03 (−0.02, 0.07); p≥0.05; null.  800 m: β = 0.00 (−0.02, 0.02); p≥0.05; null.  2000 m: β = 0.01 (−0.00, 0.02); p≥0.05; null. | | ≥0.05 (not significant) across buffers. | Null (no direct association across 400/800/2000 m). |
| Galvez et al.,  2013 | USA | Cross-sectional | | 324 | Inner-city minority children.  6–8 years | Presence (≥1 vs 0) of resources on child’s census block | | Playgrounds, parks | On-foot walking survey | Block-level availability (binary) and counts (no distances). | Exposure: ≥1 resource vs none. | Individual | Unscheduled outdoor PA (h/wk  scheduled PA (MET-h/wk)  sedentary hours/day  daily steps. | Interviewer-administered questionnaires | Logistic regression | Child age,  Gender  race/ethnicity  BMI percentile  caregiver education  perceived block safety  season  day of week. | Adjusted odds ratio (AOR) | Playground on block → unscheduled PA >2 h/wk: AOR 1.95; 95% CI 1.11–3.43; p=0.021.  After-school program on block → scheduled PA ≥1 MET-h/wk: AOR 3.25; 95% CI 1.41–7.50; p=0.006.  After-school program on block → sedentary <6 h/day: AOR 3.24; 95% CI 1.30–8.07; p=0.012.  Resource count (vs 0) → unscheduled PA >2 h/wk: 2–4 resources AOR 2.39 (1.22–4.70); 5–11 resources AOR 2.44 (1.14–5.20); P-trend=0.026.  Objective steps ≥11,000/day: null across resources. | | | Positive for playgrounds (unscheduled PA) and after-school programs (scheduled PA↑, sedentary↓); null for steps. |
| Schipperijn et al.,  2013 | Denmark | Cross-sectional | | 1,305 | Urban adults  18–80 years. | Nearest UGS size (categorical),  network distance to nearest entrance (<100/100–300/>300 m)  number of features in nearest UGS  number of UGS within 1 km  total UGS area within 1 km. | | Publicly owned, publicly accessible vegetated spaces | Municipal UGS GIS + field audit using EAPRS | Network distance | distance (<100, 100–300, >300 m) | Individual | (a) Outdoor PA ≥1×/week (any location);  (b) PA in nearest UGS ≥1×/week. | Self-reported frequency | Multiple logistic regression | Gender  age  education  self-rated health | Odds ratio (OR). | Outdoor PA (any location): All UGS metrics null (e.g., #UGS within 1 km OR≈1.00; features OR≈1.01).  PA in nearest UGS: distance ns; features per-item 1.03 (1.01–1.05) in single-factor, ns when combined/adjusted. | | | General outdoor PA: null , distance, f.  PA in nearest UGS: distance null. |
| Soares et al.,  2020 | Brazil | Cross-sectional | | 247,548 | Adults in households with landline  ≥18 years | Perceived availability of public open space (POS) near home (Yes/No) | | POS such as squares, parks, closed streets for walking/exercise/sports | Self-reported  (telephone survey) | Perception question | Exposure binary | Individual | Leisure-time PA | Self-reported via Vigitel questionnaire | Poisson regression | Gender  age  schooling  region  race/color  marital status  obesity  hypertension  diabetes  negative self-rated health | Prevalence ratio (PR) | POS available → sufficient LTPA: PR_adj 1.25 (95% CI 1.22–1.28) | | <0.05 | Positive (availability associated with higher LTPA) |
| Tappe et al.,  2013 | USA | Cross-sectional | | 724 Children | Community-based sample  6–11 years | Parent-reported proximity to recreation/play areas | | Parks, playgrounds, trails/paths, open space | Parent survey | Survey scale | Exposure modeled continuously | Child-level;  neighborhoods defined by census blocks for sampling | (1) Neighborhood activity frequency  (2) Park activity frequency  (3) Days with ≥60 min PA  (4) Accelerometer MVPA (min/day) | Parent survey;  ActiGraph GT1M accelerometer | Multivariate logistic regression  multiple linear regression | Child sex,  age  race  BMI percentile  Hispanic ethnicity  household income  GIS PA environment  other environment scales  (safety, aesthetics, street connectivity, walk/cycle facilities, barriers) | Odds ratio (OR) for survey outcomes;  β (minutes/day) for accelerometer MVPA | **Proximity to play areas → ≥5 days/week of 60+ min PA:** OR = 1.29; 95% CI 1.05–1.60; p = 0.02 (positive)  • **Proximity to play areas → Park activity** **≥2 days/week:** OR = 1.22; 95% CI 0.98–1.53; p = 0.07 (positive, borderline)  **• Proximity to play areas → Accelerometer MVPA (3-MET):** β = +4.12 min/day; 95% CI 0.66–7.58; p < 0.05 (positive) | | | Positive for proximity/access to play areas with overall PA and MVPA |
| Norman et al.,  2006 | USA | Cross-sectional | | 799 adolescents | Community sample recruited via clinics  11–15 years | Count of public parks within 1-mile buffer | | Public parks | SANDAG GIS | Street-network buffers (1 mile) in ArcView 3.2 | 1-mile network buffer | Individual-level outcomes with 1-mile residential buffer exposures | MVPA (min/day) | Accelerometer (CSA/ActiGraph) | Bivariate correlations;  hierarchical multiple linear regression | Age  ethnicity  highest household education (3 levels)  only env. vars with sig. bivariate association entered | Standardized β (linear regression);  also r for bivariate | Girls: Positive bivariate link to MVPA (r = 0.14, p < 0.01), but not significant after adjustment (standardized β = 0.009, p = 0.842).        Boys: No association (parks not significant in bivariate or final model). | | | Positive for girls (bivariate only); overall null after covariate adjustment. |
| Coutts et al.,  2013 | USA | Cross-sectional | | 67 counties | Adults  18+ (BRFSS adults) | (1) Total county green space (sq mi);  (2) Population-weighted mean distance from tract centroid to nearest green space;  (3) Population-weighted amount of green space within 0.25, 0.5, 1, and 10 miles of tract centroids | | Publicly accessible parks/forests/conservation lands | Florida Geographic Data Library (public lands, 2009) | Euclidean (straight-line) distance/buffers from census-tract centroids | 0.25,  0.5,  1,  10 miles | Census tracts aggregated (population-weighted) to counties | MVPA (% meeting moderate or vigorous PA recommendations) | 2007 BRFSS self-report  (state CHARTS database) | General linear models for fractional/proportional outcome with robust Ses | % age ≥65;  % White;  % Bachelor’s degree+ | β  (linear coefficient on % MVPA) | Total county green space: β = 4.3×10⁻⁴ , [4.9×10⁻⁵, 8.1×10⁻⁴] , p<.05 , Positive  Mean distance to nearest green space: β = 0.03 , (CI not sig.) , ns , Null  Green space within 0.25 mi: β = 0.004 , [8.6×10⁻⁴, 7.4×10⁻³] , p<.05 , Positive  Green space within 0.5 mi: β = 0.004 , [5.0×10⁻⁴, 7.1×10⁻³] , p<.05 , Positive  Green space within 1 mi: β = 0.004 , [0.001, 0.006] , p<.01 , Positive  Green space within 10 mi: β = 8.3×10⁻⁴ , [2.8×10⁻⁵, 1.7×10⁻³] , ns , Null | | | More nearby green space (≤1 mile) → higher % MVPA; distance-to-nearest not associated; 10-mile buffer not associated. |
| Lachowycz et al.,  2014 | UK | Cross-sectional | | 165,424 | Adults  16+ | % land area classified as greenspace in MSOA; within 5 km; within 10 km | | parks, woodland, grassland, agriculture; excludes private gardens | Generalised Land Use Database  (GLUD, 2005; UK Ordnance Survey–derived) | Area-based % greenspace | Quintiles (Q1 worst → Q5 best access) | Individual | Days walked ≥30 min in last 4 weeks | Self-report (Active People Survey telephone interview) | Multilevel negative binomial regression | Age,  sex,  ethnicity,  social class,  car ownership,  month (individual);  IMD 2010,  urban–rural class,  population density (area) | Incidence Rate Ratio (IRR) | Recreational walking, Q5 vs Q1 (5 km measure): IRR 1.18  Total walking, Q5 vs Q1 (10 km measure): IRR 1.10 | Recreational (5 km): 1.13–1.23  Total (10 km): 1.06–1.14 | Both p < .01 | Positive  (more nearby greenspace → more days of walking) |
| Koohsari et al.,  2013 | Australia | Cross-sectional | | 320 | Community-dwelling adults  18+ | Network distance to nearest POS (m);  number of POS ≤1 km;  total POS area ≤1 km;  POS street “integration” (space syntax) ≤1 km | | Public open spaces (parks/playgrounds) | Open Space 2002 GIS dataset (Melbourne) | Street-network distance | Quintiles for each metric;  1 km buffer | Individual | Walking to POS;  walking within POS | Self-report (IPAQ/RESIDE-style 7-day items) | Logistic regression  ANCOVA on log-minutes (walkers only) | Age,  gender,  education,  child<12,  dog ownership  neighborhood aesthetics,  traffic safety,  crime safety,  walking facilities  POS attractiveness  residential self-selection | OR (logistic);  F-tests (ANCOVA) | **Any walking to/within POS:** ORs across proximity quintiles ns (e.g., distance furthest vs closest, to **POS**: OR 0.80, 95% CI 0.24–2.64; within POS: OR 0.79, 95% CI 0.26–2.39).  Minutes (walkers only):  **To POS**: Distance F = 3.27, p<0.05; Number of POS F = 5.45, p<0.001; Total area F = 1.92, p=0.11 (ns); Integration F = 10.23, p<0.001.  **Within POS: Integration** F = 7.2 (approx.; table shows significant), p<0.05; others ns. | | | Any walking: Null  Minutes (walkers):  Farther nearest POS and fewer POS within 1 km → more walking to POS |
| Chong et al.,  2017 | Australia | Cross-sectional | | 10,137 | General adult population  16–98 years | % “local” parkland in postcode;  % “distant” parkland in contiguous postcodes (categorical) | | ABS “parkland” | ABS 2006 land-use mesh blocks aggregated to postcodes | Area-based % (not distance);  contiguity for “distant” | effect-modifier strata for local GS: <25% vs ≥25% | Individual | (1) MVPA ≥1×/week (yes/no);  (2) Adequate PA (≥150 min over ≥5 sessions/week) | Self-report  (Active Australia Survey items; NSW Adult Population Health Survey) | GEE logistic regression | Age  sex  income employment  education  overweight  self-rated health  population density | Odds ratio (OR) | Distant GS 40–<50% vs <10% → MVPA ≥1×/week: OR 1.9; 1.1–3.1; p<0.05; positive  Distant GS 40–<50% vs <10% → Adequate PA: OR 1.7; 1.0–2.7; p<0.05; positive | | | |
| Foster et al.,  2004 | UK | Cross-sectional | | 4,157 | Community-dwelling adults  16–74 years | Perceived park/open space within walking distance | | “Park/open space” | Self-report survey | Perception (no distance computed) | Dichotomized  (within walking distance: yes/no) | Individual | (a) Any walking ≥15 min/week;  (b) ≥150 min/week (past 4 weeks) | Self-reported interview | Sex-stratified logistic regression | Age  SES  education;  self-reported health limitation;  car ownership | Odds ratio (OR) | **Men:** Park/open space within walking distance → ≥150 min/week: OR 2.22 , 1.18–4.35 , p=0.01, Positive  **Women:** Park/open space within walking distance → Any walking: OR 0.62 , 0.38–1.04 , p=0.07 (ns); → ≥150 min/week: OR 1.12 , 0.62–2.04 , p=0.69 (ns) | | | Positive (significant) for men; null for women. |
| Astell-Burt et al.,  2014 | Australia | Cross-sectional | | 203,883 | Community-dwelling adults  ≥45 | % green space within 1-km radius of neighborhood (CCD centroid) | | ABS Meshblock parkland | Australian Bureau of Statistics Meshblocks (2006) | Area-based percentage within 1-km buffer | Categories by % green space | Individual | (1) Weekly participation in walking (≥1 session)  (2) Weekly participation in MVPA (≥1)  (3) Frequency (sessions/week) among participants | Active Australia Survey | Logistic regression | Age,  gender,  income,  economic activity,  couple status,  mental health  ethnicity  country of birth  language at home,  time outdoors  social interactions,  neighborhood affluence  remoteness | Odds ratio (OR);  Incidence Rate Ratio (IRR) | Weekly walking (per 20% ↑ green space): OR 1.06; 95% CI 1.05–1.08; p<0.001; positive.  Weekly MVPA (per 20% ↑): OR 1.08; 95% CI 1.07–1.10; p<0.001; positive.  Frequency among participants (≥80% vs 0–20% green space):  Walking: IRR 1.09; 95% CI 1.05–1.13; positive.  MVPA: IRR 1.10; 95% CI 1.05–1.15; positive. | | | Positive (more neighborhood green space → higher odds of weekly walking/MVPA and slightly higher session frequency) |
| Derose et al.,  2018 | USA | Cross-sectional | | 2,973 | Adults living ≤1 mile from neighborhood parks  18–74+ | Residential distance band to park | | Neighborhood public parks | Los Angeles Dept. of Recreation & Parks (48 study parks) | Distance bands within 1 mile (buffer rings) | 0–0.25 mi;  0.25–0.5 mi;  0.5–1 mi (ref) | Individual | meets ≥150 min/wk PA;  exercises in park vs no exercise;  exercises elsewhere vs no exercise | Structured interview | Hierarchical mixed-effects regression | Age,  sex,  race/ethnicity,  education,  obesity,  health status,  children <18,  perceived park safety,  screen time;  park size/usage;  neighborhood poverty & population | Risk difference (binary) | Exercises in park (vs no exercise): 0–0.25 mi vs 0.5–1 mi → +0.14 (probability), (0.07–0.20), p<.001  Meets PA recommendations: 0–0.25 mi vs 0.5–1 mi → −0.02 (−0.06–0.03), ns | | | Closer residence to park → higher odds of exercising in the park |
| Astell-Burt et al.,  2014 | Australia | Cross-sectional | | 246,920 | Community-dwelling adults  45–106 | % green space within 1-km radius of neighborhood (CCD centroid) | | ABS “park” land; farmland excluded | Australian Bureau of Statistics (parks dataset; 2006) | Area-based % within 1-km buffer | Green space categories:  0–20%  21–40%  41–60%  61–80%  ≥81% | Individual | MVPA frequency  Sitting time | Self-report—  Active Australia Survey (MVPA);  IPAQ item (sitting) | Age-adjusted prevalence comparisons for PA (crosstabs) | PA crosstabs age-adjusted; | Age-adjusted percentages by green-space category | Lowest MVPA quartile (0–3 sessions/wk):  Men: 0–20% GS 28.7% (28.3–29.0) → ≥81% GS 23.2% (21.7–24.7), ***  Women: 0–20% 26.8% (26.5–27.1) → ≥81% 22.8% (21.4–24.3), ***  Highest sitting quartile (≥7.5 h/day):  Men: 0–20% 25.2% (24.9–25.5) → ≥81% 20.7% (19.2–22.2), ***  Women: 0–20% 20.1% (19.8–20.4) → ≥81% 17.4% (16.1–18.7), *** | | *** p<0.001 | More nearby green space → lower prevalence of very low MVPA and high sitting (favorable PA profile). |
| Hall et al.,  2010 | USA | Cross-sectional | | 128 | Community-dwelling older women  Mean 69.8 y | Objective counts within 1 km of home: walking paths, parks, recreation areas | | Public parks; walking paths/trails | GIS audit of facilities around geocoded homes | Euclidean 1 km circular buffers | 1 km buffer (exposure);  10 000 steps/day (outcome) | Individual | Achieving ≥10 000 steps/day (yes/no);  steps/day | Accelerometer (ActiGraph 7165) | discriminant function analysis | Age (in MANOVAs) | Mean differences with F-tests | Walking paths within 1 km: mean 1.18 vs 1.89; F=5.88, p=0.02 (lower in <10k group)  Parks within 1 km: 2.53 vs 3.29; F=2.13, p=0.15 (ns) | | | More walking paths → higher likelihood of reaching 10 000 steps/day; parks count not significant. |
| Carlson et al.,  2012 | USA | Cross-sectional | | 718 | Community-dwelling older adults  65+ | Count of parks & private recreation facilities within 500 m of home | | Public parks | Parcel land-use data + local parks agency lists | 500 m buffer around home address; counts, then 0/≥1 | 500 m;  0 vs ≥1 facility | Individual | Total MVPA (min/week);  walking for transport (min/week);  walking for leisure | Accelerometer (ActiGraph; MVPA)  CHAMPS self-report (walking) | Mixed-effects linear regression | MVPA: age, sex, ethnicity  Transport walking: age, ethnicity, months at address, vehicles/adult  Leisure walking: ethnicity, months at address | Unstandardized B | ny park/rec within 500 m → MVPA: B = 7.59; 95% CI −10.86 to 26.03; p=0.419 (ns)  → Transport walking: B = 9.12; 95% CI −4.18 to 22.42; p=0.178 (ns)  → Leisure walking: B = −8.09; 95% CI −29.72 to 13.53; p=0.463 (ns) | | | Null (no significant association for park access across outcomes) |
| Ord et al.,  2013 | Scotland | Cross-sectional | | 3,679 | Urban-dwelling adults  16+ | % green space in neighbourhood (availability) | | Natural areas | Ward-level % greenspace (CRESH/UK small-area estimates; matched by postcode) | N/A | <25%,  25–<50%,  50–<75%,  ≥75% | CAS ward (neighbourhood), linked to individuals | (i) Meets overall PA guideline  (ii) Meets walking guideline  (iii) “Green physical activity” (uses parks/paths) | Self-reported | Logistic regression | Age  sex  equivalised household income tertiles | Odds ratio (OR) | OR=1.20 (≥75% vs <25% greenspace) for “green PA ≥1/week” | 0.83–1.74 | >0.05 (ns) | Null |
| Triguero-Mas et al.  2017 | Spain  UK  Netherland  Lithuania | Cross-sectional | | 408 | General adult residents.  18–75 | Presence/absence of green space within 300 m of home | | NOE categories—urban green space, agricultural land, semi-natural areas, wetlands, forests. | Urban Atlas 2006 (3 cities)  Top10NL (Doetinchem). | Street network buffer (300 m) around residence | ≥1 green space within 300 m (residential availability);  50 m buffer to classify NOE contact. | Individual | (i) Overall MVPA;  (ii) MVPA in NOE;  (iii) Contact with NOE (time in NOE). | Smartphone accelerometer (CalFit; ≥3 METs) + GPS for NOE location. | Logistic regression | Gender,  age,  education  living with  children <11 y  dog ownership  season,  neighborhood SES  city | Odds ratio (OR) | Overall MVPA (weekday): OR 1.14 | 0.67–1.95 | ns | null.  MVPA in NOE (weekday): OR 2.42 | 1.39–4.22 | <0.05 | positive.  Contact with NOE (weekday): OR 2.41 | 1.39–4.17 | <0.05 | positive.  Weekend (pooled): largely non-significant (details by city vary). | | | |
| Strath et al.,  2012 | USA | Cross-sectional | | 148 | Community-dwelling adults  Mean 64.3 ± 8.4 y | Objective audit within 200 m street-network buffer | | arks/trails/sports fields/courts/playgrounds | Field audit  self-report | 200 m network buffer around home | Any park (yes/no);  facility counts (continuous) | Individual | Total activity counts/day;  light PA (min/day);  MVPA (min/day) | ActiGraph accelerometer | Linear regressions  ANOVA | Age  gender  BMI  years at residence  driver’s license/car ownership  PA analyses adjusted for wear time | β coefficient | Objective non-residential destinations → MVPA: β = 0.11 | NR | p < 0.001 | positive  • Perceived proximity to non-residential uses → MVPA: β = 2.89 | NR | p = 0.031 | positive | | | |
| Young et al.,  2014 | USA | Cross-sectional | | 6th: 1,576;  8th: 3,085;  8th-MD: 730;  11th-MD: 589 | Adolescent girls  ~12, 14, and 17 years | Count of parks within 1 mile of home (objective access)  Perceived access to recreational facilities (incl. parks) | | Public parks (neighborhood parks) | GIS for park counts;  student questionnaire for perceived access | 1-mile circular (Euclidean) buffer around home for park counts  self-report for perceived access | Continuous | Individual | Daily MVPA minutes | ActiGraph accelerometer | Multilevel linear mixed models | Demographics  adiposity,  psychosocial factors,  social support,  school policies,  neighborhood variables (selected via LASSO) | β coefficient | Parks within 1 mile (8th grade, all sites): β = 0.37 | SE = 0.09 | p < 0.001 | Positive  Perceived access to facilities (6th grade): β = 0.21 | SE = 0.10 | p = 0.03 | Positive | | | |
| Calogiuri  2016 | Norway | Cross-sectional | | 2,168 | Adults  ≥18 years | **Proximity**: self-reported distance to nearest park/green/natural area (5-category scale)  **Accessibility:** perceived supportiveness of nearby NEs for PA (4-point Likert) | | Forests  green spaces & sports fields | Statistics Norway registers (zip-code crossmatch) | Self-reported categories | **Proximity response options:**  <100 m,  100–299 m, 300–499 m,  500 m–1 km,  >1 km; recoded 1–5  **Accessibility:**  1–4 Likert (does not suit me → suits me very well) | Individual | Minutes/week of NE-based PA | Self-reported questionnaire | Logistic regression | Gender,  age,  education,  income,  co-inhabitation,  small children at home,  region,  centrality,  municipality NE coverage;  “currently studying” status | Odds ratio (OR) | **Perceived accessibility**→ NE-based PA ≥60: OR 1.38 (95% CI 1.22–1.56), p < 0.001; ≥150: OR 1.57 (1.32–1.86), p < 0.001.  **Proximity (higher score** = closer) → NE-based PA ≥60: OR 0.93 (0.86–1.00), p = 0.039; ≥150: OR 0.89 (0.82–0.98), p = 0.013. | | | Accessibility = positive; Proximity (as coded) = negative |
| Davidson et al.,  2010 | Canada | Cross-sectional | | 3,421 | Grade 5 students  10–11 years | Parent-perceived neighborhood “sidewalks/parks” component | | “Good playgrounds/parks”  (presence/quality as perceived) | Parent questionnaire | Perceived Likert items | Components categorized Low/Middle/High;  PA “active” if PAQ-C score >3 | Individual | Physical activity score (1–6) and binary “physically active” | Self-reported questionnaire (PAQ-C–based) | Multilevel logistic regression  Structural Equation Modeling | Gender,  household income,  parental education,  place of residence (urban/town/rural)  school clustering | SEM path coefficient | PA: β = 0.032 | 0.010 to 0.050 | <0.01 | Positive (better sidewalks/parks → higher PA) |
| Yuma-Guerrero et al.,  2017 | USA | Cross-sectional | | 2,750 | Mothers of young children  Mothers ~15–48y;  child 4–10y | Latent “Park accessibility”:  (1) good parks/playgrounds (Likert),  (2) comfort going to nearest park (Likert),  (3) Euclidean distance to nearest park (ft),  (4) park area within 0.5 mi (acres) | | Neighborhood parks/playgrounds; nearest park border; park area | Survey + GIS park polygons (six counties) | Perceived Likert + Euclidean distance | Perceived items 4-point scales;  distance/area continuous | Individual | Leisure-time PA category | Self-reported single-item | SEM with social cohesion as mediator | Race/ethnicity,  age,  marital/partner status,  # children <10,  depression,  obesity status | Standardized path coefficients (β) | Park access → PA (direct): NS; indirect via cohesion β = 0.022, SE = 0.005, p = .103 (NS) | | | Park access → PA: null (direct & indirect NS) |
| Babey et al.,  2015 | USA | Cross-sectional | | 3,638 | Adolescents  12–17 years | Park within walking distance (Yes/No) | | Park/playground/open space near home; nearest park | Adolescent self-report | Perceived measures | Availability binary | Individual | Park-based PA status at last park visit  (active / not active / no visit in past 30 days) | Self-reported survey items | Multinomial logistic regression | Age,  gender,  race/ethnicity  adolescent nativity  maternal/paternal nativity,  household income  parental education  urbanicity  neighborhood income  neighborhood % Latino  perceived park availability  perceived park safety | Odds ratio (OR) | Park within walking distance → Active vs No visit: OR = 2.12 (1.57–2.84)  Park within walking distance → Not active vs No visit: OR = 1.66 (1.01–2.75) | | | Positive (greater perceived availability/safety → higher odds of park-based PA) |
| Cerin et al.,  2013 | China | Cross-sectional | | 484 | Elders able to walk unassisted  ≥65 years | Audit prevalence scores (0–100) for parks/recreation | | Parks/playgrounds/outdoor sports fields; trees/natural sights (audit items) | On-street environmental audits by trained raters | Audit within 400 m road-network buffers | Continuous scores (0–100) | Neighborhood (block-level aggregate) exposure; individual PA | Minutes/week recreational walking;  minutes/week OLTPA;  odds of non-participation | IPAQ–Long (Chinese), interviewer-administered | Zero-inflated negative binomial | Age,  gender,  education,  # audited segments,  area SES;  neighborhood clustering | eb (minutes model; multiplicative) and  OR (non-participation) per 1-unit score increase | Parks → recreational walking (min/wk): eb = 1.03 (95% CI 1.02–1.05), p < .01.  Parks → OLTPA non-participation: OR = 0.96 (95% CI 0.94–0.98), p < .001. | | | Positive for parks with walking minutes; negative for non-participation (i.e., higher participation). |
| Jago et al.,  2006 | USA | Cross-sectional | | 210 | Adolescent males  (Boy Scouts)  10–14 years | GIS counts of parks by type within 1-mile buffer; PCA factor “Parks.”  Self-reported “playgrounds/parks close to home” (Likert).  Observed neighborhood audits (400 m) including sidewalk characteristics. | | Public parks (mini-, neighborhood, community, school, large urban) + trails | City park boundaries (GIS) + self-report; on-street audits for observed features | Counts within 1-mile circular buffers (GIS);  400 m observed audit area;  no network/GTFS distances for parks | Continuous counts/factor scores | Individual PA | Minutes/day sedentary, light, MVPA | Accelerometer (MTI) ≥2 valid days;  Puyau cutpoints;  minutes scaled to 1080 min/day | Mixed linear regression | Age,  BMI,  parental education,  ethnicity (Anglo vs other) | Correlation (bivariate) for park factor | Parks factor—Sedentary r=0.07 (NS);  Light r=−0.07 (NS); MVPA r=−0.04 (NS).  Sidewalk characteristics—Sedentary r=−0.20, p=.004; Light r=0.20, p=.003. | | | Parks factor → null with PA; sidewalk quality → positive with light PA, negative with sedentary time |
| Zandieh et al.,  2019 | UK | Cross-sectional | | 173 | Community-dwelling older adults  ≥65 years | Accessibility/quality: attractiveness score (1–7) from presence of 6 features | | Public parks/gardens, natural green spaces, amenity green spaces ≥2 acres (0.81 ha). | Birmingham City Council | Pedestrian network distance | Include green spaces ≥2 acres;  neighbourhood defined as 2 km crow-fly from home | Individual | Minutes/day of outdoor walking within neighbourhood | GPS tracking  (2-s interval; 3–8 days) | Hierarchical linear regression | Marital status, ethnicity | Unstandardized B (SE) | Closest green space size → walking: B = 0.09 (0.04), p < .05  Most attractive green space size → walking: B = 0.11 (0.05), p < .05  Largest green space size → walking: B = 0.17 (0.07), p ≤ .01 | | | Positive for size; null for proximity, attractiveness (score), and number. |
| Li et al.,  2023 | USA | Cross-sectional | | 4,371 | Twitter users  NR | Euclidean distance to nearest park  distance buffers (0.5, 1, 1.5, 2, 2.5, 3 miles) | | Public parks | City of Atlanta – Planning GIS Open Data | Straight-line distance from tweet point to park boundary  tweets within park set to 0 distance | 0.5-mile threshold highlighted  (10-minute walk) | Tweet-to-park distances; park-level tweet counts within buffers | Active travel/PA-related tweets  (walking, jogging, running, biking) | Keyword filter + Naïve Bayes text classifier on tweets (2017);  geotagged points | One-way ANOVA | None | Percent within threshold  ANOVA p-values  OLS slope (β₁) with p and R² | 72.2% of PA tweets within 0.5 mile of a park; peak at 0.3–0.4 mile = 803 tweets (18.4%)  ANOVA: park-type differences significant at ≥2.5 miles (p=0.035 at 2.5 mi; p=0.040 at 3 mi); not significant <2.0 mi  OLS (all parks): β₁ negative and significant at 2.0–3.0 mi (e.g., 2.0 mi p=0.038; 2.5 mi p=0.033; 3.0 mi p=0.030; low R²)  OLS (playlots, 0.5 mi): β₁=72.9 (SE 31.7), p=0.027; other types generally ns | SEs reported |  | Positive association between closer park proximity (≤0.5 mi) and PA tweet activity; park size mostly not predictive |
| Michael et al.,  2010 | USA | Prospective cohort | | 422 | Community-dwelling older men.  ≥65 years. | Distance to parks and trails; presence of recreational facilities within buffers. | | Parks; walking/hiking trails; recreational facilities. | Metro RLIS GIS database | Park distance:  street-network;  trail distance: Euclidean (straight-line). | Parks: 0.125 & 0.25 miles;  Trails: 0.25 & 0.5 miles;  Recreational facilities: ≥1 within 0.25 or 0.5 miles (vs none). | Participant residence buffers | Walking time (min/day). | Self-report | Log-binomial regression | None retained | Relative risk (RR). | Effect Estimate (numeric value):  • Park within 0.125 mi, high-SES: RR=1.22.  • Trail within 0.5 mi, high-SES: RR=1.34.  • Low-SES: parks RR=0.89; trails RR=0.93 (null). | • Park 0.125 mi, high-SES: 95% CI 1.01–1.47.  • Trail 0.5 mi, high-SES: 95% CI 1.16–1.55. | Interaction terms with SES: P<0.1  overall decline in walking: P<0.05. | ositive for parks/trails in high-SES  null in low-SES; recreational facilities: null. |
| Babey et al.,  2013 | USA | Cross-sectional | | 3,379 | General adolescent population  12–17 years | Lives in a park service area (binary);  recent park visit (past month);  perceived park safety. | | Public parks & open spaces/playgrounds | California Protected Areas Database (CPAD)  GIS by Trust for Public Land. | Euclidean buffers around park perimeters. | 0.25 mi buffer for parks <1 acre  0.5 mi for ≥1 acre (inside = access). | Household location linked to park service area buffer | ≥60 min PA on ≥5 days/week | Self-report | Adjusted comparisons | Age,  gender,  race,  income,  park visit,  park safety (for access);  plus access when modeling park visit. | NR | Active ≥5 days: 44.2% (in service area) vs 34.7% (outside); 39.6% (recent park visit) vs 29.5% (no visit). | NR | Associations stated as statistically significant after adjustment (p<0.05, per brief conventions). | Positive (access/visit → more PA); lower income linked to fewer visits and perceived unsafety. |
| Adamu et al.,  2023 | UK | Cross-sectional | | 33 boroughs | General urban residents  ≥16 years | % households within set travel distances to open spaces/local/district/metropolitan/regional parks; area/% of greenspace per borough | | Public/open greenspaces with free access | Greater London open spaces dataset | Accessibility by distance thresholds  greenspace availability as area/% per borough | 400 m (open & local/small/pocket parks)  1.2 km (district)  2.4 km (metropolitan)  5 km (regional) | Borough | Walking frequency  cycling frequency | Active People Survey | ANOVA | NR | F-statistic / Pearson r | Greenspace area → walking/cycling freq: F=29.17, p<0.001 (↑ area → ↑ PA)  Accessibility → walking/cycling freq: F=224.16, p<0.001 (↑ access → ↑ PA) | | | Positive for accessibility/availability → PA |
| Orstad SL et al.  2017 | USA | Cross-sectional | | 2,969 adults;  343 neighborhoods | Urban adults  18–92 y | Observed density (proportion of blocks) of recreation facilities  perceived park access | | Parks, playgrounds, sports fields/courts, other sports equipment | In-person SSO/audit of neighborhood blocks | N/A (audit-based density) | None | Neighborhood | Weekly walking minutes;  leisure-time PA (LTPA) level (1–5) | Self-report | Multiple linear regression | Age,  gender,  education,  race/ethnicity,  marital status,  neighborhood socioeconomic disadvantage,  lower-extremity functional impairment | Indirect effect (unstandardized) via perceived park access | Recreation facilities → Walking via park access: 0.657 min/week  Recreation facilities → LTPA via park access: 0.016 (on 1–5 scale) | Walking: 0.018–1.536 (SE 0.379)  LTPA: 0.001–0.038 (SE 0.010) | Significant (CIs exclude 0) | Positive (stronger/significant at lower depressive symptoms) |
| Cardinali  2024 | Portugal  France  Bulgaria  Denmark | Cross-sectional | | 1,365 | General urban residents  15–99 y | Network-distance–based accessibility to green spaces/corridors and green-space “uses” | | Public/semi-public/plot green spaces;  green corridors | OpenStreetMap (curated) | Euclidean & network | Distances tested every 100 m from 100–1,500 m;  key peak at 600 m | Individual | Total PA  (MET-min/week; ordinal 8-level) | Self-report | Structural equation models | Age,  sex,  disabilities,  education,  income  occupation  years in neighborhood  perceived safety  satisfaction with shops/leisure/public transport  population density | Standardized β (SEM) | β = 0.765 for accessible total green space at 600 m (network) → PA | 95% CI 0.260–1.355 | <0.05 | Positive (nearby accessible green space → higher PA) |
| Hillsdon  2006 | UK | Cross-sectional | | 4,732 | Community-dwelling adults  40–74 | (a) Distance-weighted access index;  (b) size-adjusted access index;  (c) quality+size-adjusted access index;  plus distance to nearest, size of nearest, area/# of spaces within 2 km | | Public green spaces ≥2 ha | On-foot quality audit of 61 spaces (69-item tool) with GPS access points; boundaries digitized | Street-network road distance (to access points);  distance-decay weighting | Quartiles of access indices;  2 km radius for neighborhood counts/area | Individual | Recreational PA  (hours/week) | Self-report | Multiple linear regression | Age,  sex,  education,  ethnicity,  Townsend deprivation,  distance to city boundary | β coefficient | Example—# green spaces within 2 km: β = 0.001 | SE = 0.002 (95% CI NR) | 0.65 (ns) | Null (no clear association across access/quality metrics) |
| Scott MM et al.  2007 | USA | Cross-sectional | | 1,556 | 6th-grade girls  11–12 y | Within 0.5-mile of home:  presence/number of schools;  locked vs unlocked with active amenities;  number of parks | | School grounds with active amenities  public parks | NCES school lists;  local/regional park shapefiles/hand-digitized;  direct Saturday site audits | Euclidean 0.5-mile home buffer;  on-site observation | : 0.5 mile (0.805 km) radius | Individual | Weekend MET-weighted MVPA | Accelerometer | hierarchical linear models | Race/ethnicity;  neighborhood SES index;  school % free/reduced lunch (plus exposure terms) | Percent difference | No school within 0.5 mile: −9.6% weekend MVPA (p=0.08)  Each additional park (0.5 mile): +2.8% weekend MVPA (p=0.06) | NR |  | Weak/mostly null for school accessibility → MVPA; parks show positive trend → MVPA |
| Stewart et al.,  2018 | USA | Longitudinal panel with repeated measures | | 634 adults | Urban adults  ≥18 y | Count of parks and total park area (acres) within home neighborhood buffer | | Publicly owned, freely accessible outdoor parks | King County + 39 municipalities’ park GIS | Street-network “sausage” buffer | 833 m network buffer | Individual | Total PA (bout minutes/day) and subtypes:  home-park PA,  non-home-park PA,  other PA | Accelerometer | Mixed-effects negative binomial regression (IRR) | Age,  sex,  race/ethnicity,  education,  income  children in household  BMI  adult ratio  BE covariates  single-family home  residential units employment restaurant count  intersection count  sidewalk length  buffer area  neighborhood wealth | IRR | IRRTotal PA vs park count:  IRR 1.01 (95% CI 0.99–1.03), p=0.348 → null  Total PA vs park area (log):  IRR 0.99 (95% CI 0.96–1.03), p=0.614 → null  Home-park PA vs park count:  IRR 1.09 (95% CI 1.00–1.18), p=0.039 → positive  Home-park PA vs park area (log):  IRR 1.54 (95% CI 1.34–1.77), p<0.001 → positive | | | Null for proximity → total PA;  positive for proximity → park-based PA. |
| Picavet et al.,  2016 | Netherlands | Longitudinal cohort with repeated measures | | R3 n=4,796;  R4 n=4,092;  R5 n=3,658 | General adult residents of Doetinchem (urban–rural town)  20–59 | % green space within 125 m and 1 km of home address | | Urban green and agricultural green | National Land Cover Classification (LGN; 25×25 m grid) | Euclidean buffers around geocoded home address | None | Individual | Guideline adherence (≥3.5 h/wk MVPA) and hours/week in bicycling, sports, gardening, odd jobs | Validated questionnaire | Generalized Estimating Equations | Age,  sex,  educational level (SES) | Odds ratio | Total green (1 km) vs PA guideline adherence OR = 1.01 (95% CI 0.97–1.05) | 0.97–1.05 | NR | Null for guideline adherence; activity-type specific patterns for hours |
| Rodriguez-Villamizar et al.,  2024 | USA | Cross-sectional | | 49,649.00 | Adult women in the Sister Study  35–74 years at enrollment | % greenness within 250 m and 500 m of residence. | | G1 = forest/shrub/herbaceous;  G2 = G1 + developed open space | NLCD (30 m), 2006/2011. | Circular buffers around geocoded residential address (250 m, 500 m). | Tertiles  (e.g., 500 m G2 cut-points 19.5%, 46.9%). | Individual | Participation (yes/no) in specific recreational activities (walking, conditioning exercises, sports, running, gardening, bicycling) | Self-reported | Multivariable logistic regression. | Age,  ethnicity,  household income per capita,  marital status;  plus census division. | Odds ratio | (500 m, G2, upper vs lowest)  Walking 1.11;  Conditioning 1.10;  Sports 1.28;  Running 1.15;  Gardening 1.46;  Bicycling 0.79. | Walking 1.06–1.16;  Conditioning 1.05–1.16;  Sports 1.19–1.38;  Running 1.04–1.27;  Gardening 1.25–1.69;  Bicycling 0.73–0.87 | NR | Positive for walking, conditioning, sports, running, gardening;  negative for bicycling. |
| Chong et al.,  2019 | Australia | Prospective cohort | | 18,094 | Adults from the 45 and Up Study living in Sydney SD  ≥45 years | % greenspace within  500 m,  1 km,  2 km  network buffers (home address) | | Parks/reserves, forests, protected/recreation areas, other urban greenspaces | StreetPro (Pitney Bowes) | Polygon-based road-network buffers (ArcGIS Network Analyst) | Categories:  0–5%,  >5–10%,  >10–15%,  >15–20%,  >20%  (500 m top two combined) | Individual | Change in walking (h/wk), total MVPA (weighted h/wk), sitting (h/wk) | Active Australia Survey (PA); IPAQ-based sitting; self-report at both waves | GEE with compound symmetry | Age,  sex,  education,  physical functioning,  area deprivation (IRSED),  BMI,  follow-up time,  baseline value of each outcome (plus duration since diagnosis in New T2D) | Adjusted change | **MVPA: +0.27 h/wk** (≈95% CI −0.61 to +1.15) — derived from 0–5%: 0.34 (0.21, 0.48) vs ≥15%: 0.61 (−0.26, 1.49). Direction: **positive (ns).**    **Walking: +0.09 h/wk** (≈95% CI −0.30 to +0.48) — 0–5%: 0.19 (0.13, 0.25) vs ≥15%: 0.28 (−0.11, 0.66). Direction: **positive (ns).**    **Sitting: +0.01 h/wk** (≈95% CI −0.33 to +0.34) — 0–5%: −0.51 (−0.56, −0.46) vs ≥15%: −0.50 (−0.83, −0.17). Direction: **null (ns).** | | | |
| Nigg et al.,  2024 | Germany | Cross-sectional | | 923 | Children/adolescents  6–17 y | % green space within 1000 m street-network buffer  (quartiles; stratified by urbanicity) | | Vegetated/semi-natural areas (forests, green urban areas, pastures); excludes agriculture and blue space | DE-LBM2018 land cover/land use (CORINE-aligned);  street network Basis-DLM;  urbanicity DEGURBA | Street-network service-area buffers | Quartiles of % green within each urbanicity level | Individual residential buffer | MVPA (min/day) | Accelerometer (ActiGraph GT3X+/wGT3X-BT); 15-s epochs; wear-time criteria applied | Multiple linear regression | Age group,  gender,  SES,  BMI category,  accelerometer wear time,  season | Age group, gender, SES, BMI category, accelerometer wear time, season | Rural —  Middle: −6.74;  Upper: −6.77 | Middle: −13.02 to −0.46;  Upper: −13.05 to −0.50 | Both 0.035 | Negative in rural (middle/upper vs bottom); null in towns/cities (main effects). |
| Lin et al.,  2024 | Taiwan | Cross-sectional | | 214 | Community-dwelling older adults  ≥65 years | Number of parks within residential buffers | | Public open spaces for recreation, managed by local authorities | National Land Surveying & Mapping Center, Ministry of the Interior (Taiwan) | GIS Euclidean residential buffers | Buffer radii 400 m, 800 m, 1,600 m | Individual residence buffers | Steps;  LPA;  MVPA;  Sedentary time | ActiGraph wGT3X-BT accelerometer | Adjusted linear regression | Age,  gender,  education,  living status,  BMI,  hypertension,  hyperlipidaemia  diabetes,  cognitive function,  nutritional status,  smoking, alcohol,  accelerometer wear time | Unstandardized coefficient (B) | Steps: B = 0.02 | 0.01–0.04 | 0.003 | Positive  LPA (min/day): B = 0.01 | 0.00–0.01 | 0.043 | Positive  MVPA (min/day): B = 0.07 | −0.03–0.17 | 0.18 | Null  Sedentary time (min/day): B = −2.00 | −3.77–−0.24 | 0.026 | Negative | | | |
| Motomura et al.,  2024 | Japan | Cross-sectional | | 276 | Community-dwelling older adults  65–84y | Distance to nearest & second-nearest park; count of parks within buffers | | Public parks/green spaces per Japan’s National Urban Park Law | National Land Numerical Information (Japan) | GIS, street-network distances & buffers | 800 m and 1,600 m network buffers | Individual residence–centered buffers | Light PA (min/day);  MVPA (min/day);  Sedentary time (min/day);  Breaks in sedentary behavior (times per sedentary hour) | Accelerometer  (Omron Active Style Pro HJA-350IT) | Multiple linear regression | Age,  gender,  economic status,  education,  living/marital/working status,  length of residence,  number of chronic diseases,  depression,  accelerometer wear time | Unstandardized coefficient (B) | Count of parks within 1,600 m → Breaks per sedentary hour: B = 0.31, 95% CI 0.02–0.59, p<0.05, positive  All other park–outcome associations (LPA, MVPA, sedentary time; other park metrics): NS (null) | | | |
| Kaczynski AT et al.  2014 | USA | Cross-sectional | | 893 | Adults from randomly-selected households.  18–98 years | Distance to closest park;  number of parks within 1 mile;  total park acreage within 1 mile. | | City park | City of KCMO parks directory + on-site audits (n=146). | Street-network distance;  1-mile network buffer;  nearest park via park centroid. | number of parks within 1 mile | Individual;  multilevel with census tract as level-2. | Any park-based PA in a usual week. | Self-report  (PA-PS questionnaire) | Multilevel logistic regression | Gender,  age,  race,  income,  BMI. | Odds ratio. | OR = 2.53 for park-based PA (3+ parks within 1 mile vs 0). | 1.21–5.31. | <0.05 | Positive |
| Kaczynski et al.,  2009 | Canada | Cross-sectional | | 384 | Adult neighborhood residents  18–89 | (1) Number of parks within 1 km;  (2) Total park area within 1 km;  (3) Distance to closest park. | | Municipal neighborhood parks | Municipal planning/GIS maps and municipality database. | Euclidean distance using park/home centroids | 1-km buffer for exposure | Individual  (participant home). | Moderate-to-strenuous PA (MSPA):  total;  neighborhood-based;  park-based. | 7-day self-reported PA log | Binary logistic regression | Age,  sex,  BMI,  temporary injury. | Odds ratio (OR) | .  # parks within 1 km → park-based MSPA (some vs none): OR 1.15 (1.01–1.28); p<0.05; positive. | | | More parks/park area = higher MSPA;  distance to nearest park = null. |

**Table D4. Morphology studies (n = 10)**

| **Study** | **Country** | **Sample Size (No. of analytical units)** | **Analytical unit of greenspace metrics** | **The map source for greenspace morphology measures** | **Study design** | **Specific metrics used (direction of effect) *** | **Physical Activity Type** | **Data Source** | **Physical Activity Measurement Method** | **Participants** |
| --- | --- | --- | --- | --- | --- | --- | --- | --- | --- | --- |
| Zhang et al.  (2020) | UK | 54,910 | catchment (service area or influence area) around a park. | Land cover/use map: UKMap | cross-sectional | Relative Circumscribing Circle (-)  Number of Parks (ns) | Walking Density | London Travel Demand Survey (LTDS) | Walking density:  The sum of all walking trip distances within a park's catchment area are divided by the total length of the streets surrounding the park. | Adults (aged 45–65 years) |
| Kim et al.  (2020) | Korea | 148754 | Administrative boundaries | Land use land cover map from National Environmental Information Network System | cross-sectional | Class Area (-)  Largest Patch Index (+)  Shape Index (+)  Edge Density (-)  Number of Patches (+) | Duration and Frequency of Physical Activity | Korea Community Health Survey (KCHS) | Frequency of vigorous physical activities.  Frequency of walking exercises.  The duration of these activities. | Adult  (over 19 years old) |
| Wang et al.  (2021) | China | 101 sites in five urban parks | Sites within parks | Unknown | cross-sectional | Shannon diversity index (-) | Physical Activity Diversity (How many types of PA can occur in a space simultaneously) | Behavioral mapping | Carrying out observations on park user’s PA in the greenspace. | Unknown |
| Tsai et al.  (2016) | USA | 135 counties within the U.S. metropolitan statistical areas (MSAs) with populations greater than 1 million | County | National Land Cover Database (NLCD) | cross-sectional | Patch Area (+)  Edge Density (+)  Edge Contrast Index (ns)  Euclidean Distance (ns)  Cohesion Index (ns)  Patch Density (+) | Participating in Physical Activity | The Behavioral Risk Factor Surveillance System (2008) | Self-reported participation in any physical activity other than regular work in the past month, including any duration and intensity. | Unknown |
| Huang et al.  (2023) | China | 129 parks with diverse running intensity | Parks | OpenStreetMap data of 2021 Shenzhen | cross-sectional | Shape Index (ns) | Running intensity | Strava | The running intensity was calculated by dividing the total length of running routes by the respective buffer area | Unknown |
| Liu et al.  (2023) | China | 147 urban parks in the core urban districts of Chongqing | Parks | Online Maps:  Baidu Map and Amap | cross-sectional | Shape Index (-) | Jogging flow | Edooon mobile app | Jogging flow was measured using GPS trajectory data collected via the Edooon mobile app. A 100-meter buffer was applied around each park boundary to account for potential GPS inaccuracies. The number of jogging trajectories within each buffer zone was used as the metric for jogging activity. | Unknown |
| Wang et al.  (2024) | USA | 4080 census tracts across five U.S. metropolitan areas (Los Angeles, New York City, San Antonio, Seattle, Miami) | Census tracts | Satellite imagery: National Agriculture Imagery Program | Cross-sectional | Mean Area Size (AREA_MN) (-)  Patch Density (+)  Patch Cohesion Index (-)  Aggregation Index (-)  Shape Index (-) | Leisure-time physical activity (e.g., walking, running, calisthenics, golf, gardening) | PLACES: Local Data for Better Health project provided by the Centers for Disease Control and Prevention | Percentage of residents who answered “no” to the question: “During the past month, other than your regular job, did you participate in any physical activities or exercises such as running, calisthenics, golf, gardening, or walking for exercise?” | Adult  (over 18 years old) |
| Li et al.,  (2023) | China | 1,436 grid cells containing GI;  3,785 app users. |  | City land-use planning maps | Cross-sectional | Large patch Index(-)  Patch Density(ns)  Shape Index(ns)  Edge Density(ns)  Aggregation Index(+)  Division Index (**Excluded** for multicollinearity)  Contagion Index (**Excluded** for multicollinearity) | (1) Frequency of walking physical activity  (count of walking trajectories per grid);  (2) Intensity of walking physical activity  (total length of walking trajectories per grid, km). | DuoRui app walking trajectories (2016–2019) | GPS trajectories aggregated to grid; frequency = count of walking trajectories per grid; intensity = total trajectory length (km) per grid. | NR |
| Ma et al.,  (2025) | China | 78 activity sites across 10 urban parks. | Activity site (well-bounded sub-areas within parks). | Park management authority maps, Google imagery, and in-situ measurements/mapping. | Cross-sectional | Enclosure index (Higher E ⇒ stronger sense of enclosure; lower E ⇒ more open space. )  Fragment index  Shape index |  |  | On-site observations and map annotations conducted on fair-weather weekends, at four time periods |  |
| Xu & Wang  2025 | USA | 865 census tracts | | Census tract (with a 0.5-mile Euclidean buffer around tract boundaries) | | --- |  |  | | --- | | | National Agriculture Imagery Program (NAIP) – 1-meter resolution satellite imagery (captured July 2016, leaf-on season) | | --- |  |  | | --- | | | Ecological cross-sectional study | | --- |  |  | | --- | | Greenspace percentage  Mean size Fragmentation  Connectedness  Aggregation  Shape complexity | | Leisure-time physical activity (no activity vs. any activity) | | --- |  |  | | --- | | | CDC PLACES: *Local Data for Better Health* (2016) | | --- |  |  | | --- | | Self-reported telephone survey: “In the past month, aside from your regular job, did you engage in any physical activities or exercises such as running, calisthenics, golf, gardening, or walking for exercise?” | General urban population represented at the census-tract level (residents of Los Angeles City) |

**Supplementary Information F. Meta-analysis Details**

Detailed information on effect size selection, harmonization procedures, and statistical models used in the meta-analysis are provided in this appendix. This includes study-level effect estimates, forest plots, and additional diagnostic analyses supporting the robustness of pooled results.

**F1. Study-level effect estimates included in meta-analysis (NDVI)**

**Table F1. Study-level effect estimates included in the meta-analysis of satellite-derived greenness (NDVI) and physical activity. Effect sizes were harmonized so that odds ratios (ORs) greater than 1 indicate higher levels of physical activity. When multiple estimates were available, the most fully adjusted and conceptually relevant model was selected. Detailed notes describe specific modeling choices and harmonization steps.**

| **Study** | **Physical activity outcome** | **Exposure contrast (NDVI)** | **OR** | **95% CI (lower)** | **95% CI (upper)** | **Covariate adjustment** | **Notes** |
| --- | --- | --- | --- | --- | --- | --- | --- |
| Almanza et al., 2012 | MVPA (accelerometer-based, momentary 30-s epochs; children 8–14) | 10th–90th percentile increase in NDVI (≈ +0.11) | 1.39 | 1.36 | 1.44 | Yes (age, sex, race, income, BMI, time context, spatial kernel; stratified by community type) | Neighborhood MVPA outside home/school; OR shown for smart growth communities |
| Almeida et al., 2024 | Leisure-time MVPA (self-reported IPAQ; sustained MVPA over 3 visits) | NDVI quintiles (Q4 vs Q1; 500 m buffer) | 1.48 | 1.04 | 2.12 | Yes (sex, age, education, research center, slum residence, perceived safety, sidewalks, streetlights, neighborhood income) | Longitudinal; adults; outcome = MVPA in all 3 visits |
| Dadvand et al., 2014 | PA participation (lower sedentary behavior) | IQR increase in NDVI (500 m buffer) | 1.18 | 1.03 | 1.35 | Yes (age, sex, parental education, school type, siblings) | Harmonised by inverting OR for excessive screen time |
| Dadvand et al., 2016 | Moderate-to-high PA (vs low; IPAQ) | IQR increase in NDVI (500 m buffer) | 1.25 | 1.07 | 1.45 | Yes (age, sex, education, neighborhood SES) | Adults; cross-sectional |
| Doan et al., 2024 | MVPA guideline adherence (accelerometer-based; ≥150 min/week) | NDVI ≤ median vs > median (500 m buffer), among those **meeting MVPA** | 1.11 | 0.62 | 1.97 | Yes (age, sex/gender, cultural/racial background, BMI, education, season, Can-ALE, CAN-Marg) | OR extracted from joint NDVI–PA strata (Table 4); outcome = poor/fair mental health |
| Gong et al., 2014 | PA participation (regular vs irregular; ≥3×/week) | 1 SD increase in % green space (NDVI-based; 400 m buffer) | 1.21 | 1.05 | 1.41 | Yes (lower extremity physical function, psychological distress, general health, car ownership, age, marital status, social class, education, area type, deprivation) | Elderly men (≥66 years); Caerphilly Prospective Study |
| Grigsby-Toussaint et al., 2011 | Outdoor PA behavior (multi-players vs rainy day kids; preschoolers) | Per 1-unit increase in NDVI (scaled ×10; ≈0.1 raw NDVI) | 1.32 | 1.02 | 1.71 | Yes (race/ethnicity, gender, parental education, parental support for PA, parental BMI) | Multinomial logistic model; reference = rainy day kids |
| Klicnik et al., 2022 | Moderate–high total physical activity (vs low; PASE-based) | NDVI quartiles (Q3 vs Q1; 1000 m buffer; females <65y) | 1.2 | 1.1 | 1.3 | Yes (household income, education, OARS score) | Effect estimates reported stratified by age and sex (Table 2); no pooled NDVI–PA OR |
| Klompmaker et al., 2018 | Outdoor MVPA ≥150 min/week (self-reported) | Highest vs lowest NDVI quintile (300 m buffer) | 1.14 | 1.1 | 1.17 | Yes (age, sex, marital status, origin, education, work, income, smoking, alcohol, indoor PA, neighborhood SES, urbanization) | NDVI-based surrounding greenness; non-linear association; main model |
| Lu et al., 2019 | Cycling participation (cycling vs not cycling; past 3 months) | NDVI (continuous; per unit increase) within 400 m buffer | 1.04 | 0.88 | 1.24 | Yes (multilevel logistic; age, gender, income, population density, land-use mix, bike lanes, transit, slope) | NDVI not significantly associated with cycling; street greenness (GSV) significant, NDVI null |
| McMorris et al., 2015 | Leisure-time physical activity (yes vs no, past 3 months) | NDVI quartiles (Q4 vs Q1; 500 m buffer) | 1.34 | 1.25 | 1.44 | Yes (age, sex, smoking, marital status, income, month, longitude) | National Canadian sample; strongest associations in younger adults and women; primary PA outcome suitable for NDVI–PA synthesis |
| Persson et al., 2019 | Walking/cycling change (increase vs stable) | Moved to less green vs stable NDVI quartile (2 km buffer) | 1.26 | 1.13 | 1.41 | Yes (gender, age, education, area-based income) | Longitudinal; exposure = **change in NDVI quartile** |
| Villeneuve et al., 2018 | Physically active (≥ 67.1 MET-hrs/week) | Highest vs lowest tertile of residential greenness (500 m buffer) | 1.17 | 1.1 | 1.23 | Yes | PA defined as upper tertile of MET-hrs/week; greenness measured using land-cover–based vegetation proxy (NDVI-like), adjusted for age, ethnicity, marital status, census tract population, and region |
| Tamura et al., 2019 | MVPA (vs. sedentary–light, minute-level) | Greenness (NDVI), per 1-unit increase within 50 m GPS buffer | 1.15 | 1.03 | 1.3 | Yes | Objective accelerometer + GPS; dynamic 50 m buffers around each minute; fully adjusted GLMM |
| Kivimäki et al., 2021 | Increase in physical activity | Increase in neighbourhood green space (higher NDVI; disadvantaged → advantaged) | 1.11 | 0.98 | 1.27 | Adjusted for age, sex, education, survey pair, cohort | PA analyzed as lifestyle mediator; not primary PA outcome |
| Boakye et al., 2021 | MVPA (minute-level, vs sedentary–light) | NDVI, highest vs lowest quartile (Q4 vs Q1), GPS-based 100 m buffer | 1.05 | 1.01 | 1.08 | Yes | Objective accelerometer + GPS; adjusted mixed-effects models; NDVI derived from Landsat, IQR and quartile analyses reported |

**Table F2. Greenspace proximity and physical activity: study-level effect estimates**

Study-level effect estimates examining associations between greenspace proximity and physical activity. Results are grouped by outcome domain. Effect sizes were harmonized such that odds ratios (ORs) greater than 1 indicate higher physical activity.

| **Group A: PA participation/guideline** | | | | | |
| --- | --- | --- | --- | --- | --- |
| study | Exposure definition | Physical activity outcome | OR | 95% CI (lower) | 95% CI (upper) |
| Dadvand_2016 | Within 300m of >=5000 m2 green space vs not | Moderate/high PA vs low | 1.33 | 0.96 | 1.83 |
| Kaczynski_2009 | Number of parks within 1 km (per unit increase) | Meeting PA guidelines (>=150 min/wk) | 1.31 | 1.05 | 1.65 |
| Lackey_2009 | Number of parks within 500 m (per park) | Meeting PA guidelines | 1.04 | 0.98 | 1.09 |
| Toftager_2011 | Distance to nearest green space (per category increase) | Leisure-time PA participation | 1.14 | 1.02 | 1.27 |
| Witten_2008 | Worst (>2.4 min) vs best (<0.8 min) park access | Meeting recommended PA | 1.15 | 0.96 | 1.37 |
| Feng_2021 | Total green space (%) within 1.6 km road-network buffer; per 10% increase | Vigorous MVPA proportion >30% (binary) | 1.03 | 1.01 | 1.06 |
| Xiao_2022 | Park proximity (logit part; total physical activity) | Any physical activity (yes vs no) | 1.01 | 0.29 | 2.91 |
| **Group B: Park-based / recreational PA** | | | | | |
| Kaczynski_2008 | Distance to nearest park (closest vs farthest) | Park-based PA participation (any PA in parks) | 1.52 | 1.07 | 2.16 |
| Kaczynski_2014 | Park availability/density within buffer (highest vs lowest) | Park-based & recreational PA participation | 1.67 | 1.12 | 2.49 |
| Lackey_2009 | Objective park proximity (closest vs farthest) | Park-based PA participation | 1.12 | 1.01 | 1.25 |
| Bozkurt_2021 | Proximity to urban green space (walkable access; closest vs farthest) | Park-based PA participation | 1.09 | 0.56 | 2.12 |
| Schipperijn_2017 | Distance/access to nearest park (best vs worst access) | Recreational PA participation | 1.14 | 0.94 | 1.37 |
| **Group C: Walking** | | | | | |
| Sugiyama_2013 | Objective walkable green/open space availability (highest vs lowest) | Recreational walking participation (yes vs no) | 1.33 | 0.96 | 1.84 |
| VanCauwenberg_2015 | Distance to nearest park (per category closer) | Recreational walking participation | 1.16 | 1.06 | 1.27 |
| Schipperijn_2017 | Objective proximity to nearest park (best vs worst access) | Recreational walking participation | 1.14 | 0.94 | 1.37 |
| MakiOpas_2016 | Objective access to green space (closest vs farthest) | Walking for transport (participation) | 1.12 | 1.06 | 1.18 |

**Table S 4. Formula and descriptions for the indices of greenspace morphological metrics.**

| ***Criteria*** | ***Landscape indices (acronym)*** | ***Formula*** | ***Description*** | ***Unit (range)*** |
| --- | --- | --- | --- | --- |
| **Size metrics** | Mean Patch Area (AREA_MN) | aij = area (m2) of patch ij. | The average size of patches at the class or landscape level.   - A higher value indicates a larger average size of greenspaces, and vice versa. | Hectares    (AREA > 0, without limit) |
| Class Area (CA) | CA = Class area for class *i* (e.g., all greenspace patches)  aij = Area (in square meters or hectares) of patch *j* of class *i*  n = Total number of patches of class *i* | This metric quantifies the total landscape area occupied by all patches of a specific land cover class.  • A higher value indicates greater spatial dominance of the class within the landscape. | Hectares  CA ≥ 0 (no upper limit; constrained by total landscape area) |
| Patch Area  (AREA) | aij = area (m2) of patch ij. | The range in AREA is limited by the grain and extent of the image; in a particular application, AREA may be further limited by the specification of a minimum patch size that is larger than the grain. | Hectares  AREA > 0, without limit. |
| Largest Patch Index (LPI) | aij = area (m2) of patch ij.  A = total landscape area (m2). | Largest patch index quantifies the percentage of total landscape area comprised by the largest patch.   - A higher value indicates that the largest greenspace in an area occupies a higher proportion of the total land, and vice versa. | Percent   (0 < LPI < 100) |
| **Shape metrics:** | Shape Index (SHAPE) | pij = perimeter (m) of patch ij.  aij = area (m2) of patch ij. | SHAPE equals patch perimeter (m) divided by the square root of patch area (m2), adjusted by a constant to adjust for a square standard.   - A higher value signifies a more complex shape of greenspace, and vice versa. | None   (SHAPE > 1, without limit.) |
| Edge Density (ED) | E = total length (m) of edge in landscape.  A = total landscape area (m2). | ED equals the sum of the lengths (m) of all edge segments in the landscape, divided by the total landscape area (m2), multiplied by 10,000 (to convert to hectares). | Meters per hectare  (ED >= 0, without limit.) |
| Edge Contrast Index  (ECON) | pijk = length (m) of edge of patch ij adjacent to patch type (class) k.  dik = dissimilarity (edge contrast weight) between patch types i and k.  pij = length (m) of perimeter of patch ij. | Edge contrast index quantifies the proportion of a patch’s perimeter that is adjacent to contrasting land cover types.  • A higher value indicates that a greater share of the patch boundary lies next to highly contrasting covers (e.g., greenspace next to roads), and vice versa. | Percent  0 ≦ ECON ≦ 100 |
| Relative Circumscribing | A = area (m²) of the park  As = area (m²) of the park's minimal circumscribing circle | Roundness compactness coefficient (RCC) quantifies how closely the shape of a park approximates a circle.  • Calculated as 1 minus the ratio of the park area to the area of its minimal circumscribing circle.  • A lower value (closer to 0) indicates a more circular, compact shape; a higher value (closer to 1) reflects a more irregular, elongated, or fragmented shape. | None  0 ≤ RCC < 1 |
| **Fragmentation metrics** | Patch Density (PD) | ni = number of patches in the landscape type (class) i.  A = total landscape area (m2). | PD equals the number of patches of the corresponding patch type divided by total landscape area (m2), multiplied by 10,000 and 100 (to convert to 100 hectares).   - A higher value denotes a more fragmented distribution of greenspace, while a lower value suggests the opposite. | Number per 100 hectares  (PD > 0, constrained by cell size) |
| **Connectedness metrics** | Patch Cohesion Index (COHESION) | pij* = perimeter of patch ij in terms of number of cell surfaces.  aij* = area of patch ij in terms of number of cells.  Z = total number of cells in the landscape. | COHESION equals 1 minus the sum of patch perimeter divided by the sum of patch perimeter times the square root of patch area for patches of the corresponding patch type, divided by 1 minus 1 over the square root of the total number of cells in the landscape, multiplied by 100 to convert to a percentage.   - It assesses the physical connectedness of greenspace.   A lower value indicates that greenspaces become progressively subdivided and less physically connected. | None  (0 < COHESION < 100) |
| **Aggregation metrics** | Aggregation Index (AI) | gii = number of like adjacencies (joins) between pixels of patch type (class) i based on the single-count method.  max-gii = maximum number of like adjacencies (joins) between pixels of patch type (class) i (see below) based on the single-count method. | AI equals the number of like adjacencies involving the corresponding class, divided by the maximum possible number of like adjacencies involving the corresponding class, which is achieved when the class is maximally clumped into a single, compact patch; multiplied by 100 (to convert to a percentage).   - A higher value signifies a more aggregated distribution of greenspace. - The value equals 100 when greenspace is maximally aggregated into a single, compact one. | Percent  (0 <= AI <=100) |
| Number of Patches  (NP) | ni = number of patches in the landscape of patch type (class) i. | Number of patches (NP) quantifies the total count of discrete patches belonging to a particular class.  • A higher value indicates greater fragmentation or subdivision of the class across the landscape, while NP = 1 indicates the entire class consists of a single patch.  • Interpretability is limited when considered alone, as it does not reflect patch size, distribution, or density. However, it serves as a foundational metric for calculating more complex indices. | None  NP ≥ 1, without limit. |
| Euclidean Nearest-Neighbor Distance  (ENN) | hij = distance (m) from patch ij to nearest neighboring patch of the same type (class), based on patch edge-to-edge distance, computed from cell center to cell center. | Euclidean nearest-neighbor distance (ENN) measures the shortest edge-to-edge distance between a patch and its nearest neighboring patch of the same class.  • A higher value indicates greater isolation between patches, while a lower value suggests that similar patches are more closely spaced. | Meters  ENN > 0, without limit |
| **Diversity metrics** | Shannon Diversity Index (SHDI) | Pi =proportion of the landscape occupied by patch type (class) i. | SHDI equals minus the sum, across all patch types, of the proportional abundance of each patch type multiplied by that proportion.   - A higher value suggests a greater number of different greenspace types and/or a more equitable proportional distribution of area among these various greenspace types. | Information  (SHDI >= 0, without limit) |
| Edge Contrast Index (ECON) | pijk = length (m) of edge of patch ij adjacent to patch type (class) k.  dik = dissimilarity (edge contrast weight) between patch types i and k.  pij = length (m) of perimeter of patch ij. | ECON equals the sum of the patch perimeter segment lengths (m) multiplied by their corresponding contrast weights, divided by total patch perimeter (m), multiplied by 100 (to convert to a percentage).   - This index is a relative measure of the amount of contrast along the patch perimeter. - A higher value indicates that longer boundaries are adjacent to more contrasting land covers, such as greenspace and road systems. Conversely, a lower value illustrates that shorter boundaries are adjacent to less contrasting land covers, such as trees and grassland. | Percent  (0 <= ECON <= 100) |
